# Supplementary material for: Protective Effects of Vitamin K Compounds on the Proteomic Profile of Osteoblasts under Oxidative Stress Conditions
Source: Molecules. 2020 Apr 23;25(8):1990. doi: 10.3390/molecules25081990 (PMC7222007; doi:10.3390/molecules25081990)
Supplement: Supplementary file 1 [file molecules-25-01990-s001.xlsx]

## Sheet: S1, S2, S3
Supplementary table S1. The level of proteins with transporter or transcription regulator activity that expression was significant changed in osteoblasts treated with H2O2 (200μM for 24h) and vitamins K1, MK4, or MK7 (10 µM for 5 days). Results obtained basing on label-free quantification. Mean of three independent experiments with standard deviation (SD) are presented.
	Control		H2O2		H2O2+K1		H2O2+MK4		H2O2+MK7
ID	Mean	SD	Mean	SD	Mean	SD	Mean	SD	Mean	SD
B2RPK0	6200000	496000	11000000	880000	4800000	384000	10000	800	5400000	432000
O60518	10000	800	2200000	176000	10000	800	10000	800	610000	48800
O75475	3100000	248000	6100000	488000	1100000	88000	6400000	512000	10000	800
O95373	2300000	184000	6200000	496000	670000	53600	610000	48800	929000	74320
P05023	3400000	272000	2900000	232000	10000	800	10000	800	710000	56800
P13489	1300000	104000	10000	800	2200000	176000	2900000	232000	3000000	240000
P38606	1200000	96000	3300000	264000	10000	800	3200000	256000	1900000	152000
P55060	7200000	576000	17000000	1360000	1500000	120000	1500000	120000	2100000	168000
P60468	5300000	424000	7800000	624000	7300000	584000	1900000	152000	7900000	632000
Q00325	10000	800	10000	800	10000	800	10000	800	10000	800
Q02978	3700000	296000	4000000	320000	3700000	296000	10000	800	4000000	320000
Q14247	720000	57600	1800000	144000	760000	60800	3400000	272000	2700000	216000
Q14974	13000000	1040000	26000000	2080000	3800000	304000	4900000	392000	5800000	464000
Q15758	1300000	104000	1500000	120000	10000	800	10000	800	1600000	128000
Q8N163	1900000	152000	3700000	296000	10000	800	330000	26400	10000	800
Q8WVM8	2700000	216000	4000000	320000	2700000	216000	3400000	272000	10000	800
Q96P70	1300000	104000	4900000	392000	10000	800	330000	26400	700000	56000
Q96QK1	1300000	104000	5900000	472000	2000000	160000	4200000	336000	1100000	88000
Supplementary table S2. The level of proteins with transporter or transcription regulator activity that expression was significant changed in osteoblasts treated with H2O2 (200μM for 24h) and vitamins K1, MK4, or MK7 (10 µM for 15 days). Results obtained basing on label-free quantification. Mean of three independent experiments with standard deviation (SD) are presented.
	Control		H2O2		H2O2+K1		H2O2+MK4		H2O2+MK7
ID	Mean	SD	Mean	SD	Mean	SD	Mean	SD	Mean	SD
O14983	3000	120	2330000	93200	9600000	384000	3390000	135600	522000	20880
O75746	2300000	92000	15940000	637600	17000000	680000	22000000	880000	2732000	109280
P38606	6600000	264000	3000	120	6300000	252000	752000	30080	3000	120
P60468	1000	40	1000	40	1000	40	6800000	272000	1000	40
Q00325	1000	40	1000	40	7400000	296000	1000	40	1000	40
Q02978	1000	40	1000	40	1000	40	3300000	132000	1000000	40000
Q13263	1000	40	1100000	44000	1400000	56000	830000	33200	1000	40
Q15758	1000	40	1200000	48000	1900000	76000	630000	25200	1000	40
Q8N4V1	1000	50	1000	50	1000	50	1400000	70000	1000	50
Q8WVM8	2000000	80000	1300000	52000	1400000	56000	1900000	76000	1000	40
Q96QK1	1000	50	1300000	65000	800000	40000	820000	41000	1000	50
Q99523	1000	40	1900000	76000	2200000	88000	2100000	84000	1000	40
Supplementary table S3. The level of proteins with transporter or transcription regulator activity that expression was significant changed in osteoblasts treated with H2O2 (200μM for 24h) and vitamins K1, MK4, or MK7 (10 µM for 20 days). Results obtained basing on label-free quantification. Mean of three independent experiments with standard deviation (SD) are presented.
	Control		H2O2		H2O2+K1		H2O2+MK4		H2O2+MK7
ID	Mean	SD	Mean	SD	Mean	SD	Mean	SD	Mean	SD
O60518	455513	31885.9	1236000	86520	2800000	196000	10000	700	990000	69300
O75475	10593.3	741.533	10300	721	10000	700	930000	65100	10000	700
P20020	1.48307e+06	103815	10300	721	10000	700	10000	700	500000	35000
P38606	6260660	438246	3512300	245861	9110000	637700	3710000	259700	3910000	273700
P55060	3.60173e+06	252121	2884000	201880	6600000	462000	910000	63700	3200000	224000
Q00325	1.48307e+06	103815	185400	12978	10000	700	550000	38500	5300000	371000
Q00765	5.29667e+06	370767	2884000	201880	20000	1400	20000	1400	20000	1400
Q02978	3.60173e+06	252121	721000	50470	10000	700	1700000	119000	1500000	105000
Q07666	1.69493e+06	118645	2678000	187460	5100000	357000	10000	700	10000	700
Q07812	4.97887e+06	348521	3409300	238651	20000	1400	20000	1400	2200000	154000
Q13263	2.96613e+06	207629	2884000	201880	4100000	287000	10000	700	1200000	84000
Q15758	2860200	200214	1442000	100940	2200000	154000	640000	44800	1600000	112000
Q8WVM8	2.01273e+06	140891	10300	721	2400000	168000	10000	700	1200000	84000
Q99523	10593.3	741.533	10300	721	10000	700	10000	700	1800000	126000

## Sheet: S4
Supplementary table S4. The p values of proteins expression obtained basing on label-free quantification in osteoblasts treated with H2O2 (200μM for 24h) and vitamins K1, MK4, or MK7 (10 µM for 5, 15, 20 days).
Control vs. H2O2									H2O2 + K1 vs. H2O2									H2O2 + MK4 vs. H2O2									H2O2 + MK7 vs. H2O2
day 5			day 15			day 20			day 5			day 15			day 20			day 5			day 15			day 20			day 5			day 15			day 20
ID	p.value		ID	p.value		ID	p.value		ID	p.value		ID	p.value		ID	p.value		ID	p.value		ID	p.value		ID	p.value		ID	p.value		ID	p.value		ID	p.value
A0A023T6R1	0.023079		A0A024QZF2	1.5713e-07		A0A023T6R1	0.00012428		A0A024DAK3	7.3e-06		A0A024QZX3	13613		A0A023T6R1	1.8454e-07		A0A023T6R1	7.5e-07		A0A023T6R1	7.6556e-08		A0A023T6R1	1.8454e-07		A0A023T6R1	23079		A0A024QZF2	1.2e-06		A0A023T6R1	1.8454e-07
A0A024DAK3	0.00022716		A0A024QZJ6	3.8273e-05		A0A024QZF2	1.0666e-05		A0A024QYZ0	0.045		A0A024R0Q4	73168		A0A024QZF2	1.8454e-07		A0A024DAK3	2.5e-06		A0A024QYZ0	5.5443e-08		A0A024QZF2	1.8454e-07		A0A024DAK3	0.00072		A0A024QZJ6	22473		A0A024QYW2	1.7728e-07
A0A024QYZ0	1.9278e-07		A0A024QZT0	3.4787e-05		A0A024QZN4	0.0012618		A0A024QZA8	6e-06		A0A024R1N4	15016		A0A024QZN4	0.030557		A0A024QYZ0	8.2e-07		A0A024QZF2	4.5857e-08		A0A024QZN4	6.5388e-06		A0A024QYZ0	74406		A0A024QZT0	2e-05		A0A024QZF2	0.00015494
A0A024QZA8	2.5983e-07		A0A024R0J4	1.2304e-07		A0A024QZX3	0.00010668		A0A024QZJ8	0.65		A0A024R1S8	1653		A0A024QZX3	3.5392e-05		A0A024QZA8	1.9e-06		A0A024QZJ6	0.00021066		A0A024QZX5	0.0023401		A0A024QZA8	6e-06		A0A024QZX3	0.00011		A0A024QZN4	0.00019457
A0A024QZF2	0.003112		A0A024R1A3	8.8985e-05		A0A024R1N4	0.00086967		A0A024R0P9	0.32		A0A024R382	24059		A0A024QZX5	2.7558e-05		A0A024QZF2	4.1e-07		A0A024QZX3	0.010004		A0A024R0L6	5.1396e-07		A0A024QZF2	90227		A0A024QZX5	5.1e-07		A0A024QZX3	0.00061719
A0A024QZJ8	0.00058555		A0A024R1S8	5.9737e-08		A0A024R3X7	5.7625e-06		A0A024R169	8.1e-06		A0A024R599	1653		A0A024R0L6	5.1396e-07		A0A024QZJ8	8.4e-07		A0A024R0J4	0.0012807		A0A024R0Q4	0.0011732		A0A024QZJ8	38615		A0A024R0J4	2.3e-06		A0A024QZX5	0.00045851
A0A024QZX3	8.3642e-05		A0A024R3X7	1.4456e-07		A0A024R4H0	2.3301e-05		A0A024R172	2.6e-06		A0A024R6C9	36536		A0A024R0Q4	0.00016179		A0A024QZX3	16667		A0A024R0Q4	0.011118		A0A024R1A3	1.819e-05		A0A024QZX3	36055		A0A024R0Q4	4.8e-07		A0A024R0L6	5.1396e-07
A0A024R0P9	1.0628e-07		A0A024R5L0	0.021925		A0A024R5H8	2.6641e-08		A0A024R1A3	7.1e-05		A0A024R8U1	1.9e-06		A0A024R169	2.7499e-07		A0A024R0Q4	19003		A0A024R1A3	0.001071		A0A024R1N4	0.00079299		A0A024R0P9	1316		A0A024R1A3	0.0009		A0A024R169	8.0625e-07
A0A024R0Q4	0.001071		A0A024R652	1.4655e-05		A0A024R5L0	0.00010745		A0A024R1K7	0.05		A0A024RAP1	57678		A0A024R1A3	0.00059001		A0A024R169	2.9e-06		A0A024R1N4	0.016731		A0A024R2A7	0.012205		A0A024R125	2e-07		A0A024R1N4	0.00039		A0A024R1A3	0.0069567
A0A024R125	4.5019e-07		A0A024R7F1	1.9363e-05		A0A024R5Z8	3.8842e-05		A0A024R1T5	0.065		A0A024RAR8	7.7e-07		A0A024R1N4	0.00010921		A0A024R172	2.5e-06		A0A024R1S8	0.024669		A0A024R325	1.673e-07		A0A024R169	8.1e-06		A0A024R1S8	0.00011		A0A024R1N4	0.00017719
A0A024R169	7.2242e-06		A0A024R845	2.889e-07		A0A024R6W0	0.0015831		A0A024R1Y2	3.9e-06		A0A024RB87	12495		A0A024R2A7	0.00055087		A0A024R1A3	7.1e-05		A0A024R203	7.319e-08		A0A024R382	0.0013812		A0A024R172	3.5e-06		A0A024R203	2e-07		A0A024R2A7	0.00035768
A0A024R1A3	0.00055829		A0A024R872	0.0010038		A0A024R6W2	2.0633e-05		A0A024R280	8.9e-06		A0A024RBA2	25569		A0A024R325	0.003003		A0A024R1K7	3e-06		A0A024R3X7	2.9834e-08		A0A024R3X7	0.0012618		A0A024R1A3	0.00079		A0A024R2A7	7.6e-05		A0A024R325	1.673e-07
A0A024R1K7	1.1622e-05		A0A024R9E2	0.0083848		A0A024R755	0.0056336		A0A024R2M7	5e-06		A0A024RBH2	1653		A0A024R382	0.00010007		A0A024R1T5	70674		A0A024R5H8	6.5366e-08		A0A024R4E5	1.2545e-07		A0A024R1K7	1416		A0A024R382	0.0002		A0A024R382	0.0017963
A0A024R1T5	3.9659e-05		A0A024R9G4	7.3174e-08		A0A024R7L5	2.9729e-08		A0A024R3Z6	0.29		A0A024RDS1	1.8e-06		A0A024R3R6	1.6956e-07		A0A024R1Y2	8e-05		A0A024R5L0	0.00085229		A0A024R4H0	1.6456e-05		A0A024R1T5	87197		A0A024R3X7	3.2e-07		A0A024R3X7	0.00035481
A0A024R1Y2	0.00012859		A0A024RB01	6.0566e-08		A0A024R972	0.0011044		A0A024R4E5	7.6e-06		A0A024RDT4	89576		A0A024R3X7	0.00019457		A0A024R280	3.2e-06		A0A024R5Z8	3.0588e-08		A0A024R5L0	0.016367		A0A024R1Y2	0.00084		A0A024R599	5.1e-07		A0A024R4E5	3.008e-05
A0A024R280	2.889e-07		A0A024RB85	0.013689		A0A024R9E2	0.00029057		A0A024R4H0	4e-07		A0A087X2I1	16775		A0A024R4E5	0.00021182		A0A024R2M7	6.7e-06		A0A024R652	0.01316		A0A024R5Z8	8.777e-08		A0A024R280	11254		A0A024R5L0	13636		A0A024R5H8	1.3721e-06
A0A024R382	0.0042553		A0A024RB87	0.0045796		A0A024RAB6	2.9729e-08		A0A024R592	9.9e-05		A0A090N8G0	1653		A0A024R4H0	2.2117e-05		A0A024R3X7	0.00054		A0A024R845	7.0255e-08		A0A024R652	1.0113e-07		A0A024R382	14297		A0A024R5Z8	4.8e-07		A0A024R5L0	0.00023245
A0A024R3Z6	3.3404e-05		A0A024RBA2	1.1166e-07		A0A024RAE4	1.4253e-05		A0A024R5L0	3.7e-06		A0A0A0MRX9	4.2e-06		A0A024R5L0	6.445e-05		A0A024R3Z6	24961		A0A024R904	1.2152e-07		A0A024R6W0	0.012408		A0A024R3X7	64156		A0A024R652	1.4e-07		A0A024R5Z8	3.3579e-05
A0A024R4E5	0.00070391		A0A024RBS1	0.0074754		A0A024RAL1	6.9522e-05		A0A024R5M3	0.0062		A0A0A0N0L3	7e-08		A0A024R5Z8	1.5987e-05		A0A024R4E5	3e-08		A0A024R9D7	4.9237e-08		A0A024R6W2	1.9499e-07		A0A024R3Z6	22789		A0A024R6C9	9e-08		A0A024R652	0.00056849
A0A024R4H0	5.9553e-06		A0A024RC61	4.7259e-08		A0A024RAP1	0.00013876		A0A024R652	2.4e-06		A0A0C4DFV9	20014		A0A024R652	0.0004278		A0A024R4H0	8.7e-05		A0A024R9G4	0.013636		A0A024R718	0.003296		A0A024R4E5	5e-05		A0A024R718	0.00021		A0A024R6W2	0.00060921
A0A024R592	0.0016753		A0A024RDD3	9.3895e-08		A0A024RAR8	0.00044059		A0A024R6Z0	1.1e-06		A0A0S2Z3L2	23103		A0A024R6W0	9.0793e-05		A0A024R592	1e-05		A0A024RA75	6.5366e-08		A0A024R755	0.00063394		A0A024R4H0	0.00026		A0A024R7F1	5.8e-07		A0A024R755	0.0032645
A0A024R5H8	0.015444		A0A024RDG1	6.7668e-08		A0A024RB01	8.3598e-05		A0A024R718	0.59		A0A0S2Z3S2	2.7e-07		A0A024R6W2	3.1853e-05		A0A024R5H8	6.9e-07		A0A024RAV5	9.3895e-08		A0A024R7U6	4.3262e-07		A0A024R592	9e-05		A0A024R845	6e-07		A0A024R7U6	4.3262e-07
A0A024R5J5	7.162e-05		A0A024RDS1	1.1795e-07		A0A024RB16	2.601e-05		A0A024R7L5	8.1e-06		A0A0S2Z491	11631		A0A024R718	0.00010682		A0A024R5J5	4.7e-07		A0A024RB87	0.00017914		A0A024R845	1.7539e-07		A0A024R5H8	28982		A0A024R872	14199		A0A024R845	1.7539e-07
A0A024R5M3	0.00036439		A0A024RDY0	0.00012		A0A024RB72	1.9177e-08		A0A024R7U6	5.4e-06		A0A0S2Z4R1	0.00083		A0A024R755	0.00040959		A0A024R5L0	5.1e-07		A0A024RBA2	0.0042103		A0A024R872	0.0030841		A0A024R5L0	6.7e-06		A0A024R9D7	5.1e-06		A0A024R895	6.8435e-08
A0A024R652	0.0013636		A0A087WZ27	1.526e-07		A0A024RBC7	3.7739e-08		A0A024R872	0.00035		A0AUL6	50163		A0A024R7L5	1.6264e-07		A0A024R5L7	362		A0A024RBH7	5.3377e-08		A0A024R895	9.2322e-08		A0A024R5M3	77765		A0A024R9E2	7.5e-07		A0A024R8W0	7.0589e-08
A0A024R6I3	0.0020708		A0A087WZ51	0.00029109		A0A024RBH2	0.00022624		A0A024R8Q0	0.07		A4ZU86	11631		A0A024R7U6	2.4435e-05		A0A024R5M3	56849		A0A024RBS1	0.0013104		A0A024R8W0	0.00065564		A0A024R652	0.00028		A0A024R9G4	17967		A0A024RAE4	0.00011903
A0A024R6Z0	2.1959e-07		A0A087X2I1	2.9361e-05		A0A024RBH7	2.3116e-08		A0A024R972	7e-07		A5D904	6e-06		A0A024R845	1.7539e-07		A0A024R652	2.7e-05		A0A024RBT2	7.6556e-08		A0A024R972	2.1001e-05		A0A024R6I3	104		A0A024RA75	2.8e-06		A0A024RAP1	6.0014e-05
A0A024R718	0.00032629		A0A090N8G0	0.001071		A0A024RC61	0.00026285		A0A024R9D7	0.09		A5PKX5	2.4e-06		A0A024R872	3.7547e-05		A0A024R6I3	1.5e-06		A0A024RC59	0.0077765		A0A024RAE4	1.7539e-07		A0A024R6W2	11254		A0A024RAP1	1.4e-07		A0A024RAR8	0.0011006
A0A024R755	0.00038222		A0A0A1HAW1	3.136e-07		A0A024RD93	7.3188e-05		A0A024R9E2	0.32		A6NJA2	0.00018		A0A024R8Q0	0.00022344		A0A024R6W2	2e-07		A0A024RDD3	0.00048408		A0A024RAL1	2.215e-05		A0A024R6Z0	4.1e-06		A0A024RAR8	8.9e-06		A0A024RB01	4.6859e-05
A0A024R7B7	1.7909e-05		A0A0C4DGP4	1.9658e-08		A0A087WZ27	2.5738e-05		A0A024R9G4	7.8e-06		A7E2S2	33775		A0A024R8W0	0.00053538		A0A024R755	22014		A0A024RDG1	0.014787		A0A024RAR8	3.4633e-05		A0A024R718	12139		A0A024RB01	6e-08		A0A024RB16	9.9585e-05
A0A024R7L5	0.001071		A0A0C4DGX8	1.0162e-07		A0A087X2B5	0.029567		A0A024RA58	3.7e-06		A8K3B4	1.9e-06		A0A024R972	0.0008862		A0A024R7L5	2.9e-06		A0A024RDR0	7.6556e-08		A0A024RB01	0.015158		A0A024R7B7	12139		A0A024RB72	2e-06		A0A024RBA2	1.601e-07
A0A024R845	0.0035326		A0A0G2JNZ0	3.9659e-05		A0A096LPE1	0.00038065		A0A024RAM0	0.067		A8K761	26965		A0A024R9E2	0.00017637		A0A024R7U6	6.3e-06		A0A024RDS1	1.1795e-07		A0A024RB16	0.00048065		A0A024R7I3	8.9e-06		A0A024RB85	99319		A0A024RBC7	5.3055e-07
A0A024R872	0.0006408		A0A0S2Z3L2	9.3895e-08		A0A0A6YYA0	0.00012428		A0A024RB01	8e-07		B0AZR9	7e-08		A0A024RAE4	0.023279		A0A024R845	9.3e-07		A0A024RDY0	0.0024815		A0A024RBA2	1.601e-07		A0A024R7L5	8.1e-06		A0A024RB87	51819		A0A024RBE6	1.0077e-05
A0A024R8Q0	0.010666		A0A0S2Z3S2	8.2677e-08		A0A0A6YYL6	1.1041e-05		A0A024RB16	0		B0QZ43	8.9e-07		A0A024RAL1	0.013529		A0A024R872	16628		A0A087WY85	1.405e-07		A0A024RBE6	1.2133e-05		A0A024R7U6	5.4e-06		A0A024RBA2	1.2e-06		A0A024RBH2	2.9552e-05
A0A024R972	4.6875e-06		A0A0S2Z3Y1	0.0062708		A0A0B4J2D5	2.4997e-08		A0A024RBA2	8.8e-06		B0YIW5	7.5e-07		A0A024RAP1	3.8766e-05		A0A024R895	41774		A0A087WZ27	6.33e-08		A0A024RBH2	0.00017314		A0A024R845	35326		A0A024RBH2	0.0004		A0A024RBH7	3.5562e-06
A0A024R9D7	0.001625		A0A0S2Z4R1	0.00016261		A0A0C4DFU1	6.7253e-05		A0A024RBB5	0.047		B0YJC4	3112		A0A024RAR8	0.012061		A0A024R972	8.8e-07		A0A087WZ51	0.0059548		A0A024RBH7	2.4652e-06		A0A024R872	0.00079		A0A024RBH7	4.9e-06		A0A024RC61	0.0087454
A0A024R9E2	0.00064156		A0A0S2Z5M1	1.0162e-07		A0A0C4DFU2	3.3235e-05		A0A024RBH7	0.22		B3KTA3	26807		A0A024RB01	0.00093257		A0A024R9D7	8.4e-07		A0A087X020	1.2974e-07		A0A024RC61	8.2608e-06		A0A024R895	26276		A0A024RBS1	8773		A0A024RCT1	1.2531e-07
A0A024RA58	2.806e-05		A0A109NGN6	3.6101e-08		A0A0C4DFZ2	1.8645e-06		A0A024RBS1	1.6e-06		B4DKB2	16731		A0A024RB16	0.00017088		A0A024RA58	9e-07		A0A087X2I1	0.00020472		A0A024RCT1	5.0964e-07		A0A024R972	1.4e-05		A0A024RC59	0.00083		A0A024RDD3	3.08e-07
A0A024RA75	0.024669		A1A5C5	1.3351e-07		A0A0C4DG56	3.0382e-05		A0A024RC59	8e-07		B4DP62	0.0002		A0A024RBA2	0.00043503		A0A024RA75	0.00042		A0A090N8G0	0.0042553		A0A024RDG1	7.357e-06		A0A024R9D7	60679		A0A024RC61	2.7e-05		A0A024RDG1	0.006709
A0A024RAE4	0.0023449		A1JUI8	0.015444		A0A0C4MW46	2.9729e-08		A0A024RC61	3.4e-05		B4DRS6	78033		A0A024RBE6	6.478e-06		A0A024RAE4	4e-05		A0A096LNH5	7.8435e-08		A0A024RDQ0	6.3679e-06		A0A024R9G4	5e-07		A0A024RDD3	3.9e-07		A0A024RDQ0	0.022171
A0A024RAE6	0.0041327		A1L0V1	8.6468e-05		A0A0D9SFE5	2.2248e-08		A0A024RC87	1.7e-06		B4DZX7	5.1e-07		A0A024RBH2	0.00017314		A0A024RAE6	0.00073		A0A0A0MRX9	2.1659e-07		A0A087WZ27	1.5362e-06		A0A024RA58	26276		A0A024RDG1	0.00014		A0A075B712	1.8596e-07
A0A024RAM0	1.3011e-06		A1XP52	0.0098049		A0A0S2Z3L2	3.2533e-05		A0A024RCC9	0.78		B5BU24	12118		A0A024RC61	0.00063019		A0A024RAM0	0.00085		A0A0A1HAW1	6.5178e-08		A0A087X1S2	0.00038557		A0A024RAE4	54916		A0A024RDS1	1.8e-06		A0A087WVM4	6.7229e-07
A0A024RAP1	0.00012495		A2A274	2.4876e-05		A0A0S2Z3X3	0.004133		A0A024RD93	0.48		B5BUE6	10548		A0A024RD93	0.00010313		A0A024RAP1	12618		A0A0A6YYA0	5.8185e-08		A0A087X2B5	0.0005019		A0A024RAE6	4351		A0A024RDT4	4.3e-07		A0A087WZ27	6.1437e-08
A0A024RAR8	3.5422e-07		A2VCT2	1.0628e-07		A0A0S2Z3Y1	0.00027647		A0A024RDB2	0.00058		B7Z9I1	7.7e-07		A0A024RDD3	1.564e-07		A0A024RAV5	2.3e-07		A0A0A6YYG9	8.2677e-08		A0A090N8G0	0.015158		A0A024RAM0	12209		A0A024RDY0	0.00023		A0A087X1S2	0.0048818
A0A024RAV5	0.0018273		A4QPA1	1.254e-07		A0A0S2Z415	1.9716e-05		A0A024RDD3	8.2e-06		B7ZB67	33755		A0A024RDG1	0.0003907		A0A024RB01	5.4e-07		A0A0A6YYL6	7.319e-08		A0A096LPE1	8.777e-08		A0A024RAR8	2e-06		A0A087WY85	4.1e-06		A0A087X2B5	0.0014765
A0A024RB01	0.00027937		A4QPB0	6.5617e-06		A0A0S2Z5C0	0.0042715		A0A024RDS1	6e-06		B7ZKK7	6.9e-06		A0A024RDQ0	0.00019818		A0A024RB16	0.00018		A0A0C4DGX8	0.0098049		A0A0A0MRJ7	1.601e-07		A0A024RAV5	3188		A0A087WZ27	2.8e-06		A0A096LPE1	2.4357e-05
A0A024RB16	0.00076424		A4VCH6	9.3895e-08		A0A0S2Z5K8	6.5301e-05		A0A024RDY0	0.00032		B7ZW00	92697		A0A024RDT4	1.365e-07		A0A024RB87	3.2e-05		A0A0S2Z3Y1	0.0015065		A0A0A0MSM0	1.8454e-07		A0A024RB01	0.00049		A0A087WZ51	11808		A0A0A0MRJ7	1.601e-07
A0A024RB85	0.00012053		A5D904	0.00029961		A0A0S2Z5M1	3.3941e-08		A0A087WW40	1.8e-06		B8XPJ7	2.9e-06		A0A087WVM4	1.3248e-07		A0A024RBA2	5.7e-07		A0A0S2Z415	0.016984		A0A0A6YYA0	1.8454e-07		A0A024RB16	0.00081		A0A087X2I1	5.5e-06		A0A0A0N0L3	1.4084e-07
A0A024RB87	0.0020014		A5YM53	5.9737e-08		A0A0S2Z5P6	3.7404e-05		A0A087WWI4	6.3e-05		B8XPJ8	2.9e-06		A0A087WZ27	3.1717e-05		A0A024RBB5	5e-08		A0A0S2Z4R1	2.916e-05		A0A0A6YYL6	2.5459e-05		A0A024RB85	12139		A0A090N8G0	83172		A0A0A6YYL6	3.9512e-05
A0A024RBA2	4.6631e-06		A5YPB6	8.7734e-08		A0A0S2Z5U7	3.7404e-05		A0A087WWP1	7.2e-05		B8Y0L3	7.7e-07		A0A087X1S2	0.0024977		A0A024RBS1	8.7e-07		A0A0S2Z580	6.6485e-08		A0A0C4DFU1	1.0507e-06		A0A024RB87	20014		A0A0A0N0L3	7e-08		A0A0C4DFU1	2.9952e-06
A0A024RBB5	0.00029793		A6NDY9	3.9508e-06		A0A0S2Z6F0	2.9729e-08		A0A087WYR3	0.17		C9J9C1	43923		A0A087X2B5	0.0013312		A0A024RC59	5.3e-07		A0A0S2Z5I7	1.2974e-07		A0A0C4DFU2	2.5429e-06		A0A024RBA2	0.00085		A0A0A1HAW1	8.1e-06		A0A0C4DFU2	2.9952e-06
A0A024RBH2	0.0062708		A6NIW5	1.6941e-07		A0A0U1RRH9	2.1565e-06		A0A087WZH7	0.0016		C9JAM8	13869		A0A090N8G0	0.00014136		A0A024RC61	9.3e-07		A0A0S2Z5M1	0.0054175		A0A0C4DFV9	9.2322e-08		A0A024RBB5	23098		A0A0A6YYA0	2.5e-06		A0A0C4DFV9	6.8435e-08
A0A024RBH7	0.00029762		A7BI36	1.3351e-07		A0PJ62	8.8144e-06		A0A087X020	0.0053		C9JCQ4	1583		A0A096LPE1	8.777e-08		A0A024RC87	1.3e-06		A0A0S2Z5N2	0.014787		A0A0C4DFZ2	0.0002815		A0A024RBH2	12139		A0A0A6YYG9	5.1e-06		A0A0C4DFZ2	1.3407e-05
A0A024RBS1	0.00019678		A8K3B4	1.1864e-07		A0PJ85	1.2504e-08		A0A087X0K1	0		C9JDR0	86732		A0A0A0MRJ7	0.00069804		A0A024RCC9	0.00059		A0A109NGN6	0.00030432		A0A0C4DG56	2.0539e-06		A0A024RBH7	53926		A0A0A6YYL6	7.5e-07		A0A0C4DG56	9.369e-06
A0A024RC59	1.6563e-07		A8MT02	2.5983e-07		A0PJ87	3.3371e-06		A0A087X0Z7	7e-07		C9JFN4	2276		A0A0A0MSM0	0.00022856		A0A024RDB2	1.5e-05		A0AUL6	0.032863		A0A0C4DGH5	8.7459e-06		A0A024RBS1	9.9e-05		A0A0C4DFV9	8.9e-07		A0A0C4DGH5	0.0053341
A0A024RC61	0.004448		B0AZR9	9.0653e-08		A0PJG0	0.00017096		A0A087X253	0.002		C9JFR7	8.4e-06		A0A0A6YYA0	1.8454e-07		A0A024RDD3	6e-05		A0N071	7.8435e-08		A0A0D9SFE5	0.00041334		A0A024RC59	7.1e-06		A0A0C4DGP4	1.5e-05		A0A0C4MW46	2.5322e-07
A0A024RC87	4.7822e-07		B1AK85	0.0010696		A1A5C4	0.00015158		A0A090N8P3	0.31		C9JG65	13181		A0A0A6YYL6	1.3861e-05		A0A024RDS1	3.3e-07		A0PJH2	7.1675e-08		A0A0G2JH37	5.1031e-07		A0A024RC61	3.6e-05		A0A0C4DGX8	2e-07		A0A0G2JH37	1.4835e-07
A0A024RCC9	0.00033083		B1AK87	0.0063854		A1E286	0.00072137		A0A0A0MSM0	8e-06		C9JJT5	2.3e-06		A0A0C4DFU1	7.7008e-06		A0A024RDT4	15363		A1A5C5	0.015156		A0A0S2Z3L2	0.00015571		A0A024RC87	5.4e-06		A0A0G2JNZ0	3e-08		A0A0S2Z3L2	0.00033833
A0A024RCT1	6.5706e-06		B1AR63	5.2008e-05		A1L0V1	0.010707		A0A0A0MTR1	8e-06		C9JYS6	85021		A0A0C4DFU2	1.819e-05		A0A024RDY0	0.00026		A1E286	0.0011937		A0A0S2Z3L7	1.673e-07		A0A024RCC9	94967		A0A0J9YXF2	4.3e-07		A0A0S2Z3S2	0.0011575
A0A024RD93	1.7909e-05		B1PS43	6.4306e-08		A1L0W4	5.0437e-08		A0A0A0MTS7	0.082		D1MGQ2	7.6e-07		A0A0C4DFZ2	1.2719e-05		A0A087WVN4	6387		A1JUI8	0.019363		A0A0S2Z3S2	1.1873e-07		A0A024RCT1	14469		A0A0S2Z3L2	20661		A0A0S2Z3X3	0.0012871
A0A024RDB2	0.023987		B3KQV6	0.0090002		A1L180	6.834e-05		A0A0C4DFS8	0.48		D3DQH8	8.2e-07		A0A0C4DG56	2.8362e-05		A0A087WWI4	8.5e-05		A1L0V1	0.0033755		A0A0S2Z3X3	3.3774e-05		A0A024RD93	12139		A0A0S2Z3L7	6.7e-05		A0A0S2Z3Y1	7.145e-05
A0A024RDD3	0.00076633		B3KTA3	0.024669		A2BDD9	0.00015699		A0A0D9SFE5	0.00097		D3DR65	8.9e-07		A0A0C4DGH5	0.00016352		A0A087WWP1	4.2e-05		A1XP52	0.030697		A0A0S2Z3Y1	0.00065402		A0A024RDB2	0.00074		A0A0S2Z3S2	2.7e-07		A0A0S2Z4A5	1.0545e-05
A0A024RDS1	0.00051983		B3KU28	3.6512e-05		A2VCQ4	6.7253e-05		A0A0D9SGF6	7e-06		D3DUG9	7e-07		A0A0D9SFE5	0.001502		A0A087WZ27	9e-06		A2A274	0.017757		A0A0S2Z4A5	1.673e-07		A0A024RDD3	3e-05		A0A0S2Z3Y1	3e-08		A0A0S2Z5K8	0.00027579
A0A024RDT4	0.00079675		B3KXS5	9.3895e-08		A2VCR0	3.9613e-08		A0A0J9YXF2	3.3e-06		D6RBD0	3.3e-06		A0A0S2Z3L7	0.00020021		A0A087WZH7	35306		A2A2D0	5.8881e-08		A0A0S2Z5C0	0.000127		A0A024RDS1	0.00021		A0A0S2Z415	0.00034		A0A0S2Z5M1	2.9039e-07
A0A024RDY0	5.91e-05		B4DJI1	1.6451e-05		A2VCT3	4.9895e-05		A0A0S2Z3D9	0.075		D6REM6	98049		A0A0S2Z3S2	0.0057142		A0A087X020	9e-07		A2VCR0	8.5088e-08		A0A0S2Z5K8	1.4253e-07		A0A024RDT4	84194		A0A0S2Z491	4.6e-07		A0A0S2Z5P6	4.7671e-05
A0A087WWI4	5.5598e-06		B4DKB2	0.00024211		A3R0T7	0.00011273		A0A0S2Z3W2	0.97		D6RFL1	29875		A0A0S2Z3X3	0.00027689		A0A087X027	71356		A2VCT2	0.00062157		A0A0S2Z5P6	1.673e-07		A0A024RDY0	1924		A0A0S2Z4R1	4.8e-05		A0A0S2Z5U7	4.7671e-05
A0A087WWP1	1.7277e-06		B4DP62	0.0015414		A4FU11	0.00013696		A0A0S2Z415	0.077		E5RG03	48199		A0A0S2Z3Y1	0.00022258		A0A087X0K1	6387		A4D2P2	8.7734e-08		A0A0S2Z5U7	1.673e-07		A0A087WVN4	47209		A0A0S2Z580	6e-06		A0A0S2Z6F0	1.6956e-07
A0A087WYR3	9.4268e-05		B4DPX0	9.3895e-08		A4QMW8	0.0012903		A0A0S2Z4A5	2e-07		E5RK62	1e-07		A0A0S2Z415	0.00099123		A0A087X0Z7	2.9e-06		A4FU11	7.6556e-08		A0A0U1RRH9	0.0087971		A0A087WVQ6	5.8e-06		A0A0S2Z5M1	2e-07		A0A0U1RRH9	0.0024592
A0A087WZ27	0.010548		B4DYN5	0.0012852		A4QPB0	0.0042183		A0A0S2Z4D8	2e-06		E7EMS6	0		A0A0S2Z4A5	8.455e-05		A0A087X253	10006		A4QPA1	0.010406		A0AUL6	0.0032797		A0A087WWI4	9e-05		A0A0S2Z5N2	5e-08		A0AUL6	0.00020447
A0A087WZH7	0.00010684		B5BU24	3.5479e-08		A4UCS8	5.7024e-05		A0A0S2Z4R1	9e-06		E7EPA6	11429		A0A0S2Z4R1	1.3248e-07		A0A0A0MSM0	2.3e-07		A4QPB0	0.0006748		A0PJ62	0.0016419		A0A087WWP1	0.00029		A0A109NGN6	21314		A0PJ62	1.3654e-07
A0A087X020	0.00024757		B5BUB5	0.0027671		A4UCT1	0.0028264		A0A0S2Z4W6	5.8e-06		E7EU96	7e-08		A0A0S2Z5C0	0.00071346		A0A0A0MTR1	2.3e-07		A5D904	9.5497e-06		A0PJ85	5.6166e-08		A0A087WZH7	8e-05		A0AUL6	12495		A0PJ87	5.1397e-05
A0A087X0K1	0.00022951		B7Z1D1	6.9924e-08		A4UJ43	2.9729e-08		A0A0S2Z4Z9	0.041		E9PAV3	11647		A0A0S2Z5K8	0.00059001		A0A0A0MTS7	1.4e-06		A5YPB6	8.7734e-08		A0PJ87	0.00020355		A0A087X020	11647		A0N071	4.6e-06		A0PJC9	1.377e-07
A0A087X0Z7	3.1727e-07		B7Z9I1	7.4813e-08		A4ZU86	0.00013876		A0A0S2Z5I7	0.0053		E9PBF6	7e-08		A0A0S2Z5M1	1.7728e-07		A0A0A0N0L3	0.00071		A6NDY9	7.9062e-05		A0PJC9	1.377e-07		A0A087X027	25947		A1A5C5	3.4e-06		A0PJG0	2.2335e-05
A0A087X1N8	0.0035071		B7ZB67	0.0033755		A5D6Y6	0.00010102		A0A0S2Z5K8	3.7e-06		E9PCX2	0.00092		A0A0S2Z5P6	3.6944e-05		A0A0A6YYA0	5.6e-05		A6NIW5	5.2551e-08		A0PJG0	6.8447e-08		A0A087X0K1	15136		A1E286	0.00019		A0PJH2	3.7048e-07
A0A087X253	0.00010295		B7ZKK7	9.7523e-08		A5D904	7.4216e-06		A0A0S2Z5M1	2e-06		E9PFN5	25044		A0A0S2Z5U7	3.6944e-05		A0A0A6YYL6	0.00031		A6NJA2	1.4631e-07		A1A5C4	1.2197e-07		A0A087X253	11317		A1JUI8	12915		A1A5C4	0.006709
A0A090N8G0	0.0017307		B7ZKY6	4.8017e-08		A5PKT9	7.2693e-05		A0A0U4BW16	6.2e-05		E9PG39	4.3e-06		A0A0U1RRH9	6.4817e-05		A0A0C4DFV9	41774		A6NLN1	0.003006		A1E286	3.0008e-05		A0A090N8P3	17757		A1L0V1	0.00036		A1E286	0.00028816
A0A0A0MSM0	0.00012495		B7ZLA9	8.2677e-08		A5YM53	0.00029598		A0JLQ9	4.1e-06		E9PH38	28462		A0AUL6	0.00059001		A0A0C4MVT1	3e-05		A7BI36	0.015156		A1L0V1	6.6255e-06		A0A0A0MSM0	0.00037		A1XP52	0.00042		A1JUI8	0.00667
A0A0A0MTR1	0.00045084		B7ZW00	1.7776e-07		A5YPB6	2.7576e-08		A0JLT9	5.4e-06		E9PI86	77765		A0PJ62	1.3654e-07		A0A0D9SGF6	7.2e-07		A7E2S2	0.0036797		A1L0W4	0.00014686		A0A0A0MTR1	8e-06		A2A274	5.8e-07		A1L0V1	0.00018746
A0A0A0MTS7	2.4796e-07		B8A6G2	2.8702e-08		A6NIW5	5.8442e-05		A0JNT2	6e-06		E9PL85	1144		A0PJ85	4.8482e-08		A0A0J9YXF2	6e-08		A7E2S3	5.9737e-08		A1L180	2.0706e-07		A0A0A6YYA0	21318		A2A2D0	1.5e-06		A1L0W4	0.00014686
A0A0A0N0L3	2.188e-07		B8XPJ7	1.2884e-07		A6NLN1	8.5788e-05		A0PJ62	0.94		E9PNV3	19106		A0PJ87	1.0574e-05		A0A0S2Z3D9	5.4e-05		A8K761	1.3319e-05		A1XP52	0.00054956		A0A0A6YYL6	11541		A2VCT2	6e-07		A1L180	2.0706e-07
A0A0A6YYA0	0.0026604		B8XPJ8	1.2884e-07		A6NP16	0.00015699		A0PJG0	8.6e-06		E9PPQ4	8e-05		A0PJC9	0.006885		A0A0S2Z3L2	51602		A8MT02	9.7523e-08		A2A274	1.4423e-06		A0A0C4DFV9	26276		A4QMW8	0.00065		A1XP52	0.016078
A0A0A6YYL6	0.00015275		B8Y0L3	5.2031e-08		A7BI36	0.00015158		A1L0V1	4e-05		E9PPQ8	30274		A0PJG0	0.00030648		A0A0S2Z3M4	1.3e-05		B0AZR9	0.029434		A2BDD9	5.5054e-08		A0A0C4MVT1	39468		A4QPA1	2.5e-06		A2A274	0.0030016
A0A0C4DFS8	0.00032629		B8ZZ54	3.0245e-07		A8K4Z4	0.015717		A1L0W4	0.69		E9PPR5	36797		A1A5C4	0.0012962		A0A0S2Z415	35275		B0YJC4	0.010102		A2IDB2	1.4782e-07		A0A0D9SFE5	13757		A4QPB0	10973		A2BDD9	5.5054e-08
A0A0C4MVT1	0.00063245		B9EKV4	0.021548		A8K761	3.5452e-08		A2VCL1	8.9e-06		F1T0B3	1.2e-06		A1E286	0.00060571		A0A0S2Z4A5	1.5e-05		B1AK13	1.6941e-07		A2VCQ4	6.0359e-06		A0A0D9SGF6	5.7e-05		A4UCS8	0.00014		A2IDB2	1.4782e-07
A0A0D9SFE5	0.0008773		B9VP24	1.433e-05		A8MZG1	0.00017599		A2VCQ4	1.9e-06		F2Z393	99201		A1JUI8	0.00012041		A0A0S2Z4D8	4.6e-07		B1AK85	9.3378e-08		A2VCR0	1.9499e-07		A0A0S2Z3D9	26945		A4UJ43	8.5e-06		A2VCR0	1.9499e-07
A0A0D9SGF6	4.1516e-06		C9J539	0.00027002		B0AZR9	2.2384e-08		A2VCR0	0.053		F4ZW63	98049		A1L0V1	0.0050582		A0A0S2Z4I7	40809		B1AK87	0.0060476		A2VCT3	2.5265e-05		A0A0S2Z3L2	30208		A4VCH6	3.9e-07		A2VCT3	0.0051373
A0A0S2Z3D9	2.0472e-06		C9J9C1	0.00095275		B0YJC5	0.0043527		A2VCT2	9.3e-06		F4ZW65	77765		A1L0W4	2.0463e-05		A0A0S2Z4W6	43951		B1AR63	0.01653		A3R0T7	0.0011199		A0A0S2Z3M4	26435		A4ZU86	4.6e-07		A3R0T7	0.0008862
A0A0S2Z3L2	0.012609		C9J9X7	5.667e-08		B1AHD1	1.9964e-08		A2VCT3	6.9e-06		F4ZW66	77765		A1L180	0.00027537		A0A0S2Z580	2.3e-07		B1PS43	0.00022543		A4FU11	8.6422e-08		A0A0S2Z415	27671		A5D904	12355		A4FU11	0.00010823
A0A0S2Z3M4	0.015041		C9JDR0	0.024669		B1ANL0	5.9706e-06		A4FU11	0.069		F5H0C8	50799		A1XP52	0.00050823		A0A0S2Z5I7	9e-07		B2M1S8	7.8435e-08		A4FU99	2.3788e-07		A0A0S2Z4A5	0.00046		A5YM53	0.00059		A4FU99	2.3788e-07
A0A0S2Z3S9	8.5159e-05		C9JFR7	0.00017871		B1AR63	0.00016417		A4FVA8	3.7e-06		F5H6U7	6.6e-07		A2A274	0.0071265		A0A0S2Z5K8	9e-07		B2R5M8	0.0086092		A4QMW8	0.0033756		A0A0S2Z4D8	1.3e-05		A5YPB6	7.7e-07		A4QPB0	0.0011403
A0A0S2Z3W2	8.5159e-05		C9JI87	9.6366e-05		B1Q3B4	3.5714e-08		A4QPB0	1.2e-05		F8VSL7	30524		A2BDD9	0.0018535		A0A0S2Z5M1	1e-07		B2R6C4	7.1675e-08		A4QPB0	8.5993e-06		A0A0S2Z4W6	7.3e-05		A6NDY9	6.6e-07		A4UCT1	0.00060781
A0A0S2Z415	2.8905e-05		C9JJT5	1.2304e-07		B2MV14	3.3532e-05		A4UJ43	0.064		F8W1K5	8.8e-06		A2IDB2	1.4782e-07		A0A0U1RQQ4	12408		B3KTA3	0.0057265		A4UCS8	0.00016831		A0A0S2Z5I7	11647		A6NIW5	7e-08		A4UCU2	0.00029354
A0A0S2Z4A5	0.0013956		C9JKI3	7.1398e-05		B2R6F3	3.1075e-05		A4VCH6	7e-07		G1UI16	10933		A2VCQ4	0.00026106		A0A0U4BW16	7.3e-05		B4DDI9	0.026994		A4UCT1	0.00039295		A0A0S2Z5K8	3.7e-06		A6NJA2	4.6e-06		A4UJ43	8.0625e-07
A0A0S2Z4D8	3.7946e-05		C9JKM9	6.5992e-05		B2R6Q2	1.4253e-05		A5D904	0.47		G3V1A4	14863		A2VCR0	1.9499e-07		A0JLQ9	5.6e-06		B4DJI1	0.0049571		A4UCU2	0.00266		A0A0S2Z5M1	0.0001		A6NLN1	21998		A4VCH6	0.00065917
A0A0S2Z4R1	3.2457e-05		C9JMD7	0.00017871		B2R6S5	3.2375e-08		A5PHJ9	8.1e-06		G3V1U5	6.6e-07		A2VCT3	0.00029906		A0JLT9	1.6e-06		B4DKB2	0.0088989		A4VCH6	1.9499e-07		A0A0U4BW16	0.00084		A7BI36	3.4e-06		A4ZU86	4.759e-05
A0A0S2Z4W6	1.6208e-07		C9JSZ1	1.5673e-05		B2RCZ7	4.5267e-05		A5YM53	7.3e-06		G3V2K7	5.5e-06		A3R0T7	0.00024781		A0PJ62	5.1e-05		B4DP62	0.00016257		A5D6Y6	2.5943e-07		A0JLQ9	4.1e-06		A7E2S2	7.7e-07		A5D904	1.1025e-07
A0A0S2Z4Z9	9.5497e-06		C9JUP7	4.4589e-08		B3KNF6	6.8785e-08		A5YPB6	8.1e-06		G9K388	14199		A4D0V4	0.00031424		A0PJG0	7.7e-06		B4DRS6	1.6305e-05		A5D904	6.9756e-05		A0JLT9	5.4e-06		A7E2S3	1.2e-06		A5PKT9	1.5364e-07
A0A0S2Z580	0.021318		C9JYS6	8.9156e-08		B3KNJ4	6.8237e-05		A6NJA2	0.0002		G9K389	14199		A4FU11	8.6422e-08		A0PJJ5	9.5e-06		B4DUC8	9.7523e-08		A5PKT9	1.5364e-07		A0PJ62	601		A8K3B4	1.9e-06		A6NHQ2	0.00065054
A0A0S2Z5I7	0.00024757		D1MGQ2	4.7633e-08		B3KPA6	4.8791e-06		A6NLM8	0.75		H0Y4Z6	25515		A4FU99	0.0010736		A0PJK4	3e-07		B4DYN5	3.435e-05		A5YM53	0.00011271		A0PJG0	8.6e-06		A8MT02	5.3e-06		A6NIW5	1.9225e-05
A0A0S2Z5K8	0.0025309		D3DR22	0.021143		B4DID5	0.00014339		A6NLN1	0.008		H0Y7Z1	42901		A4QMW8	0.00038486		A1L0V1	9.6e-05		B4DZX7	6.7668e-08		A6NIW5	3.029e-06		A0PJJ5	5e-06		B0AZR9	7e-08		A6NP16	5.5054e-08
A0A0S2Z5M1	0.0043923		D3DRR6	0.0077765		B4DJF2	9.8713e-05		A6NMY6	0.0083		H0Y8X7	11878		A4UCS8	0.0018745		A1L0W4	12946		B5BU24	3.2892e-06		A6NLN1	0.00053984		A1L0V1	0.00047		B0QZ43	8.9e-07		A6PVH9	1.8596e-07
A0A0U4BW16	0.00045593		D3DUG9	0.0078189		B4DPA3	0.0013039		A6YID7	6.6e-06		H0YDL9	11387		A4UCT1	0.00015599		A2A2D0	0.00022		B5BUB5	0.016397		A6NP16	5.5054e-08		A1L0W4	28094		B0YIW5	57566		A7BI36	0.006709
A0JLQ9	3.4071e-07		D3DVQ1	1.1166e-07		B4DR61	4.2619e-05		A7E2S3	0.097		H0YE29	6.7e-06		A4UCU2	9.0793e-05		A2VCL1	1.8e-06		B7Z9I1	7.8435e-08		A6PVH9	2.0703e-07		A1XP52	14787		B0YJC4	0.00057		A7E2S3	9.0648e-08
A0JLT9	2.5371e-07		D6RBD0	1.2303e-07		B4E0X1	0.00053783		A8K1Z2	0.074		H0YFC6	1.2e-06		A4VCH6	0.0001679		A2VCQ4	4.5e-07		B7ZKK7	8.7734e-08		A7BI36	1.2197e-07		A2A2D0	49347		B1AK85	9e-08		A7IZZ3	2.5322e-07
A0PJ62	7.7258e-05		D6REM6	5.4436e-05		B5BUB1	0.0033147		A8K7Q2	0.075		H0YFD6	13511		A4ZU86	3.8766e-05		A2VCR0	0.00016		B7ZW00	1.7776e-07		A7E2S2	1.564e-07		A2AB90	14469		B1AK87	12951		A7XZE4	1.9499e-07
A1L0V1	0.00042578		D6RFL1	1.4668e-05		B5BUB5	0.00015272		A8K8N7	6e-06		H0YJ21	2.6e-06		A5D6Y6	0.00037265		A2VCT2	8.2e-07		B8A6G2	5.2521e-06		A7E2S3	0.0043222		A2VCL1	68357		B1AR63	2.6e-05		A8K4Z4	0.017921
A1L0W4	1.3872e-07		D6W5E6	0.0018434		B7Z1D1	2.1623e-05		A9CB80	8.6e-06		H0YJE4	37746		A5D904	6.5029e-05		A2VCT3	7.5e-07		B8XPJ7	3.0508e-05		A7IZZ3	2.0703e-07		A2VCQ4	4e-06		B1PS43	63245		A8K761	5.0768e-07
A2A2D0	0.035484		E1NZA1	0.0074754		B7Z3V1	1.4622e-05		B0I1S7	2e-07		H0YKD0	23338		A5PKT9	0.00015217		A4D2P2	8.2e-05		B8XPJ8	3.0508e-05		A7XZE4	1.9499e-07		A2VCT2	1.9e-05		B2M1S8	4.6e-06		A8K916	0.033007
A2AB90	6.5706e-06		E2QRI1	2.3182e-05		B7Z6E6	0.0028164		B1AH87	0.99		H0YLU2	5.7e-06		A5YM53	0.0022985		A4FU11	0.0009		B8Y0L3	5.8185e-08		A8K761	1.1232e-05		A2VCT3	0.00084		B2R5M8	6.9e-07		A8MW50	0.0028591
A2VCQ4	0.042283		E5KMI6	9.3895e-08		B7Z9I1	4.0077e-08		B1AH99	0.00097		H0YMI6	56598		A5YPB6	9.089e-08		A4FU51	6.4e-07		B8ZZ54	3.0788e-08		A8K916	0.0049178		A4FU51	2.5e-06		B3GQS7	0.00083		A8MZG1	6.677e-06
A2VCR0	0.0006408		E5KNY5	2.5386e-05		B7ZKY6	6.3547e-05		B1AHC9	0.026		H0YNX6	30626		A6NHQ2	9.0793e-05		A4FVA8	9e-07		B9VP24	0.0025133		A8MW50	0.014912		A4FU99	6.8e-05		B3KQ51	0.00015		B0AZR9	2.352e-07
A2VCT2	0.00036439		E5RG03	3.403e-08		B7ZW00	6.834e-05		B1AJQ6	5.4e-06		H3BPK7	33755		A6NHR9	1.0054e-07		A4QPB0	4.7e-05		C8C504	7.8435e-08		A8MZG1	7.5688e-08		A4FVA8	26276		B3KQV6	0.00065		B0YIW6	1.5406e-05
A2VCT3	0.00016785		E7EMS6	8.713e-08		B8XPJ7	3.1075e-05		B1AK88	0.097		H3BS10	77885		A6NIW5	1.103e-05		A4UJ43	3.8e-07		C9J539	0.015593		B0YIW6	0.0014722		A4QPB0	1e-05		B3KTA3	0.0003		B0YJC5	0.017145
A4D2P2	1.233e-05		E7ENM1	8.5542e-08		B8XPJ8	3.1075e-05		B2R5U3	0.91		H3BTN5	10832		A6NLN1	0.00015069		A4VCH6	4.1e-06		C9J9C1	0.021051		B0YJC5	5.2549e-05		A4UCS8	10933		B3KU28	3.9e-07		B1AK13	3.9869e-07
A4FU11	0.0014144		E7EPA6	9.6872e-08		B8Y0L3	0.00030612		B2R6E5	2.8e-06		H3BU13	13765		A6NP16	0.0018535		A4ZU86	1513		C9J9M4	0.002716		B1AK13	3.9869e-07		A4VCH6	0.00037		B3KXS5	3.9e-07		B1ANL0	0.008661
A4FVA8	2.806e-05		E7EQR4	7.1675e-08		B8ZZL6	2.7857e-08		B2RAZ0	0.07		H7C597	15349		A6PVH9	1.6956e-07		A5D904	1.1e-05		C9JAM8	0.021925		B1AK85	0.0024079		A4ZU86	17757		B4DDI9	1.9e-05		B1AR63	0.0042286
A4QMW8	1.7752e-05		E7EW37	8.2783e-08		B8ZZL8	5.1446e-06		B2RB32	8.9e-05		I6L957	45796		A7BI36	0.0012962		A5YM53	9.3e-07		C9JFR7	4.8327e-08		B1ANL0	2.1922e-05		A5PHJ9	8.1e-06		B4DEX8	5.4e-07		B1Q3B3	1.2921e-07
A4QPB0	5.5388e-05		E7EX44	0.0013057		B9EKV4	9.6807e-05		B2RBW5	5.9e-06		I6LPK7	8.1e-06		A7E2S2	7.6571e-08		A5YPB6	57601		C9JI87	0.00012748		B1AR63	1.6518e-05		A5YM53	10371		B4DJI1	60747		B2MV14	2.2594e-05
A4UCS8	8.6468e-05		E9PAV3	2.2918e-05		B9VPB4	0.00033911		B2RPK0	0.0037		I6TRR8	77765		A7E2S3	9.0648e-08		A6NIW5	7.3e-05		C9JJT5	1.5265e-05		B1Q3B3	2.0076e-05		A5YPB6	1638		B4DKB2	22306		B2R5W3	2.5322e-07
A4UCU2	0.012139		E9PBF6	0.017757		C9J1E1	1.7646e-08		B2RTX2	8.9e-06		J3KN16	3e-06		A7IZZ3	1.4084e-07		A6NJA2	17035		C9JKI3	3.8387e-08		B1Q3B4	5.0964e-07		A6NIW5	23885		B4DP62	10255		B2R6F3	5.5933e-05
A4UJ43	0.013423		E9PCX2	4.5851e-08		C9J1E7	0.00070847		B2RU06	1.7e-06		J3KRY1	7e-06		A7XZE4	5.9742e-06		A6NJU6	0.00067		C9JKM9	0.00083742		B2MV14	5.2361e-08		A6XMH4	24843		B4DPX0	3.9e-07		B2RA56	2.5322e-07
A4VCH6	0.0037497		E9PDF2	9.6929e-08		C9J2Q4	1.6403e-05		B3KM87	0.00038		J3QKT2	24059		A8K4Z4	0.00019071		A6NLM8	44497		C9JM55	0.00023989		B2R6Q2	2.1227e-05		A6YID7	0.0001		B4DRS6	12192		B2RCZ7	2.1305e-07
A4ZU86	0.00012495		E9PFN5	6.5127e-06		C9J8D4	9.1698e-06		B3KSH4	7.7e-05		J3QLI9	1.8e-06		A8K916	0.0028436		A6NLN1	18827		C9JMD7	4.4878e-08		B2RCZ7	2.1305e-07		A8K1Z2	2e-05		B4DUC8	3.8e-06		B2RU06	4.5635e-07
A5D904	0.0033755		E9PG39	0.00017871		C9JAZ1	3.5714e-08		B3KSQ7	3.3e-06		J3QLR1	11395		A8MW50	0.0073556		A6XMH4	13337		C9JPC3	4.1652e-05		B2RU06	4.5635e-07		A8K7Q2	86445		B4DZX7	5e-06		B2RU10	4.5635e-07
A5PHJ9	1.9555e-05		E9PGT1	1.9003e-07		C9JCA9	0.00027063		B3LEU8	4.1e-06		J7M2B1	8.4e-07		A8MZG1	0.00036884		A6YID7	1.1e-05		C9JUP7	0.0027267		B2RU10	4.5635e-07		A8K8N7	6e-06		B5BU24	0.0001		B2ZZ89	0.0068128
A5YM53	0.002819		E9PGX9	0.0049226		C9JF79	0.003231		B4DDZ4	0.04		K7EJ44	48546		B0AZR9	1.365e-07		A7E2S2	28262		C9JYS6	1.7045e-07		B2ZZ89	9.3264e-05		A8K8U3	4.2e-05		B5BUB5	12495		B3GQS7	0.0001899
A5YPB6	0.0025658		E9PMA0	7.0249e-05		C9JG65	0.00096869		B4DHQ3	8.9e-06		K7EME0	43731		B0YIW6	5.4026e-06		A7E2S3	6.3e-07		C9JZ81	0.028525		B3KNF6	6.0733e-07		A9CB80	8.6e-06		B5BUE6	6.5e-07		B3KNF6	2.176e-07
A6NIW5	1.3011e-06		E9PN25	3.819e-06		C9JGT6	7.5825e-08		B4DID5	0.0042		K7EN27	1.9e-06		B0YJC5	0.00026693		A7XZE4	19003		D1MGQ2	0.013423		B3KNJ4	1.3309e-05		B0I1S7	0.0004		B7Z1D1	0.00045		B3KNJ4	0.0028513
A6NJA2	1.1406e-07		E9PNV3	8.963e-08		C9JH19	0.0027881		B4DJI1	0.083		K7EPV9	8.5e-07		B1AK13	3.9869e-07		A8K8N7	1.9e-06		D3DPG0	6.0566e-08		B3KPA6	0.0047853		B0YIW6	72909		B7ZB67	11961		B3KPA6	0.00019153
A6NJU6	0.014986		E9PPQ4	2.549e-07		C9JI87	0.00047372		B4DKB2	5e-06		K7EQA9	1653		B1AK85	1.555e-05		A8MX94	9.7e-05		D3DQH8	0.022959		B4DJF2	0.00018855		B1AH87	19917		B7ZKY6	0.00064		B4DJF2	6.3717e-06
A6NLM8	0.002964		E9PPR5	6.7668e-08		C9JKI3	0.00018409		B4DMB5	0.27		L0R849	42553		B1ANL0	3.661e-05		A9CB80	7.7e-06		D3DRR6	0.0029326		B4DMB5	2.2001e-07		B1AH99	0.00092		B7ZLA9	2.7e-07		B4DKB2	1.8596e-07
A6NLN1	2.5108e-06		E9PQJ2	3.0901e-05		C9JPK5	0.00013215		B4DUI5	0.8		O00264	5.2e-06		B1AR63	0.00061918		B0I1S7	2.1e-07		D3DUG9	1.0684e-07		B4DNW7	0.017979		B1AHC9	2819		B7ZW00	7.8e-06		B4DMB5	2.352e-07
A6NMY6	0.00023103		E9PRH9	0.0045796		C9JR96	0.0024754		B4DVJ0	0.68		O00461	5.3e-06		B1Q3B3	1.2921e-07		B0YIW6	11453		D6RBD0	4.7342e-08		B4DPA3	0.0037506		B2R6E5	2.8e-06		B8A6G2	12459		B4DNW7	0.017281
A6YID7	3.0089e-06		F1T0B3	0.00022473		C9JSZ1	0.015508		B4E043	0.62		O14929	7.5e-07		B2R5W3	1.8596e-07		B1AH87	17354		D6REM6	8.3201e-08		B4DR61	0.00048391		B2RB32	8.7e-05		B8XPJ7	39817		B4DPA3	0.0058653
A7E2S2	0.0055235		F2Z393	0.011518		C9JTK6	3.3531e-05		B4E0E1	7.3e-06		O14943	3e-08		B2R6F3	2.3788e-07		B1AH99	4e-06		D6W5E6	0.013613		B4DSN5	1.9579e-07		B2RB89	62708		B8XPJ8	39817		B4DSN5	1.6956e-07
A7E2S3	0.00050577		F4ZW65	7.8435e-08		C9JUP7	0.0028379		B4E1L0	0.68		O14967	26714		B2R6Q2	0.00013389		B1AHC9	10698		D9HTE9	5.3089e-08		B4E0X1	7.2544e-08		B2RBW5	8.8e-05		B8Y0L3	9.3e-06		B4E0X1	0.00029331
A7XZE4	2.0642e-05		F4ZW66	7.8435e-08		C9JV77	4.4766e-05		B5BUE6	0.017		O14983	0.00059		B2RCZ7	2.1305e-07		B1AJQ6	9.2e-07		E1NZA1	0.0013104		B5BU24	5.8202e-08		B2RPK0	96905		B8ZZ54	1.2e-07		B5BU24	0.00015614
A8K1Z2	3.101e-05		F5GWF8	0.001071		C9JZ20	1.9895e-05		B7Z1X9	0.00025		O15400	2e-07		B2RU06	0.00022532		B2RAZ0	7e-05		E4W6B6	8.0468e-08		B5BUB1	0.0063223		B2RTX2	8.9e-06		B8ZZL6	6.6e-07		B5BUB1	0.00095641
A8K7Q2	1.5114e-06		F5GXD8	0.009117		C9JZ81	0.0013525		B7Z3V1	6e-06		O43681	6e-07		B2RU10	0.00022532		B2RB32	5.3e-07		E5RG03	0.010447		B7Z1D1	4.175e-05		B2RU06	1071		B9EKV4	5e-08		B5BUB5	0.0042495
A8K8N7	0.00020259		F5GZI0	1.2155e-05		D1MGQ2	3.8842e-05		B7Z6K2	0.0092		O75083	9.2e-07		B2ZZ89	0.00044268		B2RB89	2.9e-06		E5RIW3	3.6533e-08		B7Z3V1	0.00023221		B3GQS7	26994		B9VP24	31531		B7Z3V1	4.8104e-05
A8K8U3	1.4294e-06		F5H0C8	0.010728		D3DR22	6.2902e-05		B7Z6P3	7e-07		O75396	38742		B3GQS7	7.8277e-05		B2RBW5	2.3e-07		E7D7Y0	9.3895e-08		B7Z6E6	0.001488		B3KM87	0.00067		C8C504	4.6e-06		B7Z6E6	0.00013742
A8MVZ9	1.0732e-06		F5H136	0.0091017		D3DRR6	0.0015337		B7ZKK7	0.027		O75718	15741		B3KNJ4	0.00014196		B2RCZ7	1.3e-07		E7EMS6	8.0837e-06		B7ZKY6	1.2986e-05		B3KQ19	34165		C9J539	0.00092		B7ZM96	0.00040146
A8MX94	0.00087408		F5H2V6	1.0945e-07		D3DV26	1.1252e-08		B7ZKY6	3.9e-06		O94826	2.4e-06		B3KPA6	1.3513e-05		B2RPK0	9e-08		E7ENM1	0.0005873		B7ZM96	2.6258e-07		B3KRS7	27307		C9J9C1	4.8e-07		B7ZM99	6.7229e-07
A9CB80	0.00046813		F5H6N1	0.00017871		D6R991	0.00047481		B7ZLE5	9.2e-06		O94874	10598		B4DID5	7.0089e-05		B2RTX2	3.2e-06		E7EPA6	0.0047477		B7ZW00	1.9775e-05		B3KSH4	1.4e-07		C9J9M4	26947		B7ZW00	0.0039844
B0AZR9	2.3261e-07		F5H6U7	1.9564e-07		D6RD18	0.0021486		B7ZW00	4.1e-06		O95325	3.9e-07		B4DJF2	1.3969e-05		B2RU06	32939		E7EQR4	0.0021067		B8XPJ7	2.3788e-07		B3KSQ7	3.3e-06		C9J9X7	4e-06		B8Y0L3	0.00040146
B0I1S7	0.00039573		F5H6X6	3.1336e-05		D6RDG7	6.9554e-05		B8XPJ7	0.048		O95782	225		B4DKB2	1.6956e-07		B3GQS7	52155		E7ER27	0.0037497		B8XPJ8	2.3788e-07		B4DDZ4	2512		C9JAM8	6.2e-07		B8ZZL8	0.00051768
B0YIW6	0.0077765		F6VDH7	0.022459		D6RDU5	0.00011915		B8XPJ8	0.048		P00558	10059		B4DNW7	0.00060522		B3KM87	4e-05		E7EU96	9.0653e-08		B8Y0L3	2.6466e-07		B4DHQ3	11254		C9JCP0	0.00075		B9EG90	2.7499e-07
B1AH87	0.0042103		F8VSL7	1.2382e-07		D6RDX1	8.9838e-05		B8Y0L3	8.9e-06		P02765	77765		B4DPA3	0.00016494		B3KNJ4	3743		E9PB61	6.6485e-08		B8ZZL6	1.377e-07		B4DKB2	5e-06		C9JCQ4	0.00097		B9EKV4	0.014656
B1AH99	6.1957e-07		F8VZB1	5.8944e-08		D6RGY2	1.7092e-05		B9EG90	4.1e-06		P02786	6e-07		B4DR61	2.9838e-07		B3KQ19	9e-07		E9PBF6	9.0653e-08		B8ZZL8	0.001325		B4DMK9	57265		C9JDR0	0.0003		B9VPB4	0.001521
B1AHC9	0.032943		F8W1K5	1.8835e-07		D9HTE9	2.6641e-08		B9EKV4	6e-06		P02808	8.7e-07		B4E0X1	7.2544e-08		B3KSH4	4.3e-07		E9PCX2	2.42e-05		C9J1E1	1.5099e-07		B4DNY3	79526		C9JFN4	0.00088		C9J1E1	1.223e-07
B1AK88	0.00067006		G1UI16	1.0162e-07		E2DRY6	0.0076994		B9VP19	0.4		P09486	8.2e-07		B5BU24	1.1724e-05		B3KSQ7	7e-07		E9PDF2	0.00032203		C9J1E7	1.7677e-07		B4E043	23837		C9JG65	0.00045		C9J1E7	1.7677e-07
B2R5U3	0.00067567		G1UI21	7.6556e-08		E2DTL8	9.1987e-06		C4P0D4	6.9e-06		P0DME0	20014		B5BUB1	4.0048e-05		B3KT18	30464		E9PEX6	0.0077765		C9J2Q4	0.0015814		B4E0E1	0.00044		C9JI87	56769		C9J2Q4	0.00056772
B2R6E5	0.00057566		G3V1A4	2.4797e-05		E2QRI1	0.00016823		C9IZL7	0.0041		P10768	4.3e-07		B5BUB5	0.0001899		B3LEU8	6e-06		E9PFN5	2.2591e-05		C9J539	0.017443		B4E1E0	27417		C9JJT5	46415		C9J539	0.0032341
B2RAZ0	0.00036613		G3V1U5	1.9564e-07		E4W6B6	2.3301e-05		C9J177	2.6e-06		P11216	77765		B7Z1D1	0.00036512		B4DDI9	22999		E9PG39	6.2433e-08		C9J8D4	0.0010674		B4E1L0	9.3e-06		C9JKI3	3.8e-06		C9J8D4	0.0043885
B2RB32	0.00066633		G3V2J8	4.0744e-05		E5KMI6	5.4779e-05		C9JIG9	5e-06		P12111	92697		B7Z3V1	6.7384e-05		B4DHQ3	3.2e-06		E9PGT1	9.7523e-08		C9JCA9	1.2366e-05		B5MC82	13869		C9JKM9	23103		C9JCA9	0.0023054
B2RB89	2.8084e-07		G3V3E6	0.001625		E5RH09	0.00011899		C9JJT5	0.17		P15924	5.6e-06		B7Z6E6	0.00013039		B4DJI1	17276		E9PGX9	0.017377		C9JF79	0.016056		B7Z1X9	3e-05		C9JM55	7.7e-05		C9JG65	0.0073074
B2RPK0	0.0021973		G3V5G2	1.4244e-07		E5RHG6	2.9729e-08		C9JNK6	0.0045		P15927	8.1e-06		B7Z9I1	1.0244e-07		B4DJS7	26021		E9PI86	0.0042553		C9JG65	0.00062943		B7Z3V1	0.00075		C9JMD7	2.8e-06		C9JGT6	9.9541e-08
B2RTX2	0.00055829		G3XAM7	9.0653e-08		E5RI98	0.00013876		C9JUP7	7.5e-07		P17661	42553		B7ZKY6	0.00041705		B4DKB2	7e-07		E9PL85	0.001581		C9JGT6	2.2424e-07		B7Z6B3	49698		C9JPC3	87478		C9JH19	1.212e-05
B2RU06	0.0017827		G9K388	7.359e-05		E7EMS6	2.6669e-05		C9JZR2	9.1e-05		P17844	10548		B7ZLP5	1.7728e-07		B4DMK9	17301		E9PNV3	0.010299		C9JH19	0.00047457		B7Z6K2	13373		C9JSZ1	6.4e-05		C9JI87	0.00015454
B3GQS7	0.0072512		G9K389	7.359e-05		E7EP04	4.3076e-08		C9K055	1.2e-06		P19338	1292		B7ZM96	2.6258e-07		B4DPA3	24935		E9PP27	0.023515		C9JI87	3.6242e-05		B7Z6P3	7e-07		C9JUP7	4.6e-07		C9JJ34	1.673e-07
B3KM87	1.7764e-06		H0Y2W2	6.8232e-05		E7EPA6	0.0045825		D1MGQ2	4.8e-06		P19525	6.9e-06		B7ZM99	1.3248e-07		B4DS43	2.7e-06		E9PPQ4	1.1604e-06		C9JJ34	1.673e-07		B7Z9I1	5.4e-06		C9JVG3	0.0002		C9JKI3	0.00040563
B3KNJ4	0.00083949		H0Y368	0.0010696		E7EPD2	3.8486e-08		D3DP75	5e-06		P20700	7e-08		B7ZW00	0.00017756		B4DUI5	4.1e-05		E9PPQ8	7.6556e-08		C9JKI3	5.5195e-07		B7ZKK7	49698		C9JYS6	7e-06		C9JPK5	0.0021707
B3KQ19	0.0012669		H0Y4J6	7.0142e-06		E7EQR4	7.4789e-05		D3DPG0	0.082		P23246	14144		B8XPJ7	2.3788e-07		B4E043	24195		E9PPR5	6.7668e-08		C9JPK5	0.0001551		B7ZKY6	0.00092		C9JZ81	1e-05		C9JQU6	1.7728e-07
B3KRS7	4.3506e-06		H0Y4Z6	5.4335e-08		E7ER44	3.3532e-05		D3DQH8	0.12		P23381	44775		B8XPJ8	2.3788e-07		B4E0E1	9.3e-07		E9PRB9	4.886e-08		C9JR96	2.1512e-06		B7ZLE5	4.8e-05		D1MGQ2	7.6e-07		C9JTK6	0.027906
B3KSH4	3.1417e-08		H0Y5F5	0.0075424		E7ERC4	2.9346e-05		D3DVC4	2.4e-06		P28331	14705		B8ZZL6	0.00029678		B4E1E0	1648		E9PRH9	0.0018777		C9JSZ1	0.00010485		B7ZW00	4.1e-06		D3DNF9	9.3e-05		C9JUP7	0.0010532
B3KSQ7	0.00056538		H0Y7R7	1.433e-05		E7ESS4	7.7236e-05		D3DVQ1	2.6e-06		P30048	1.2e-06		B8ZZL8	0.00015261		B5BU72	362		F1T0B3	1.1166e-07		C9JTK6	0.015616		B8Y0L3	86007		D3DQH8	8.2e-07		C9JV77	7.8004e-05
B3KT18	9.2362e-06		H0Y7Z1	1.9345e-08		E7ESV4	0.0041896		D3DWL0	5.4e-06		P30613	17074		B9EKV4	6.8452e-05		B5MC82	1.4e-06		F2Z2I8	0.004957		C9JUP7	5.9987e-08		B8ZZL8	72289		D3DR22	6e-05		C9JYS6	4.5734e-07
B3KTA3	1.3199e-05		H0Y875	0.004787		E7EU96	2.86e-08		D3DXJ4	3.3e-06		P31939	1.2e-06		B9VPB4	0.00022203		B7Z1X9	3.9e-07		F4ZW65	0.00024305		C9JV77	5.4342e-08		B9EG90	4.1e-06		D3DR65	8.9e-07		C9JZ81	0.0016129
B3LEU8	4.0467e-07		H0Y8X7	4.5857e-08		E7EW37	0.012945		D6R9F8	7e-06		P37108	1.2e-06		C9J1E1	9.5555e-08		B7Z2E6	0.00067		F4ZW66	0.00024305		C9JVG3	0.0093888		B9EKV4	2e-07		D3DRR6	7.3e-05		D3DR22	0.0050582
B4DDI9	0.0094138		H0Y8Z9	0.00013697		E7EWE5	0.00042605		D6RCP9	9.8e-06		P37802	8.9e-06		C9J1E7	0.02949		B7Z3V1	1.9e-06		F5GWF8	0.0006377		C9JZ20	5.914e-05		B9VP19	5815		D3DUG9	7e-07		D3DRR6	0.0071276
B4DDZ4	0.00028542		H0Y983	4.3373e-05		E9KL35	0.0006621		D6RGI3	0.0088		P38606	8.9e-07		C9J2Q4	7.4196e-05		B7Z6B3	8.9e-07		F5GYG5	7.319e-08		D1MGQ2	3.2007e-05		C4P0D4	1653		D3DVQ1	0.00025		D3DUW6	6.097e-05
B4DHN0	8.6645e-08		H0Y9K1	1.0305e-07		E9PBS1	0.0002946		D6W5E6	0.47		P41219	93664		C9J539	6.7734e-05		B7Z6K2	0.00099		F5GZI0	0.021051		D3DRR6	0.018744		C7DJS2	12139		D6RBD0	1.1e-07		D6R991	0.0001086
B4DHQ3	2.889e-07		H0YCC6	0.0034211		E9PCR7	6.4037e-05		E1NZA1	1.6e-06		P41250	1653		C9J8D4	3.6236e-05		B7Z6P3	4.1e-06		F5GZN3	0.018301		D3DTW3	0.0013089		C9J177	7.3e-06		D6REM6	0.00081		D6R9W4	1.4917e-07
B4DID5	1.9863e-07		H0YD14	0.00076633		E9PEF9	5.1126e-05		E2QRI1	0.079		P46783	25772		C9JCA9	0.00030518		B7Z9I1	8e-07		F5GZV7	6.0346e-08		D3DUW6	0.00011235		C9J3N8	23427		D6RFL1	6.7e-05		D6RD66	1.0291e-05
B4DJI1	2.621e-06		H0YDG0	8.6839e-08		E9PFN5	0.00065505		E4W6B6	0.08		P46940	22046		C9JF79	8.9981e-05		B7ZKY6	3.4e-07		F5H0C8	1.3872e-07		D6R991	1.4828e-05		C9J4N6	19927		D6W5E6	10038		D6RDX1	1.4149e-05
B4DJS7	1.0226e-05		H0YDL9	9.5932e-05		E9PI21	3.8726e-06		E5KMI6	1.6e-06		P49591	40683		C9JG65	0.00015437		B7ZLE5	4.9e-06		F5H136	0.011087		D6R9W4	1.4917e-07		C9JDR0	19746		E1NZA1	8773		D6RGY2	0.00016399
B4DKB2	0.012139		H0YDS9	0.0020014		E9PJC6	0.018092		E5KNY5	8.9e-06		P49748	78047		C9JH19	9.9977e-06		B7ZW00	5.6e-06		F5H6N1	7.2131e-08		D6RD18	0.00069945		C9JNK6	51983		E2DRY6	0.00041		D6RJI2	0.020381
B4DMB5	2.7749e-05		H0YE29	9.3895e-08		E9PJH8	0.00021532		E5RI16	7.8e-06		P53004	3.9e-07		C9JJ34	1.673e-07		B8XPJ7	7e-07		F5H6U7	1.824e-07		D6RD66	0.019003		C9JPC3	12326		E2QRI1	0.00041		D9HTE9	2.7499e-07
B4DNN2	0.0018273		H0YER7	1.241e-05		E9PMV1	0.00021314		E5RK62	0.077		P54136	1.8e-06		C9JKI3	1.4465e-05		B8XPJ8	7e-07		F8VPF3	7.6443e-08		D6RDG7	0.0005203		C9JUP7	1.6e-05		E5KMI6	3.9e-07		E2DTL8	0.00031726
B4DNY3	0.00027484		H0YF33	0.0045796		E9PN89	0.013285		E7ENL6	4.1e-06		P54886	13613		C9JPK5	0.00022215		B8Y0L3	3.2e-06		F8VSL7	2.6113e-05		D6RDU5	1.8039e-07		C9JZR2	6e-06		E5KNY5	0.00079		E4W6B6	7.2129e-08
B4DPA3	0.0018998		H0YFA9	0.006981		E9PNF7	5.1727e-05		E7EQT5	0.00058		P54920	2e-07		C9JR96	0.0062093		B8ZZL8	0.00061		F8VUX1	0.029487		D6RDX1	0.00023105		C9K055	4.8e-06		E5RG03	5e-07		E5KMI6	0.00011047
B4DS43	2.7511e-07		H0YFC6	8.1264e-08		E9PNH1	0.00020892		E7EQW5	0.0006		P55084	16301		C9JSZ1	0.0006604		B9EG90	5.6e-06		F8VXU5	9.3895e-08		D6RGI3	1.2197e-07		D3DP75	5e-06		E5RK62	1e-07		E5RG29	0.00040146
B4DUI5	0.00080999		H0YH27	4.6895e-08		E9PNV3	0.00010875		E7ES33	0.21		P55263	2e-06		C9JTK6	0.00036982		B9EKV4	1.3e-06		F8VZB1	0.013074		D6RGY2	0.015414		D3DP78	9.3e-06		E7EMS6	175		E5RH09	2.7808e-05
B4DVJ0	7.2745e-05		H0YHM6	4.7025e-05		E9PNW4	5.5143e-05		E7ET15	7.8e-06		P61026	10042		C9JUP7	0.0035451		C4P0D4	7e-06		F8W1K5	1.478e-05		D6RJI2	0.020381		D3DQH8	2.1e-06		E7ENM1	0.00079		E5RHW4	2.2001e-07
B4E043	3.2341e-06		H0YIC4	0.00029335		E9PP27	0.0014461		E7EU96	0.37		P61163	37824		C9JV77	0.021655		C7DJS2	7e-06		F8W8T1	0.004298		D6W5E6	0.0050086		D3DUG9	5964		E7ENU9	5e-08		E5RI98	4.0715e-05
B4E0E1	0.020077		H0YIV0	2.0275e-06		E9PPQ4	0.00019518		E9PBS1	0.24		P63096	4666		C9JVG3	6.7335e-05		C9J3N8	8.6e-05		G1UI16	1.0162e-07		D9HTE9	1.7728e-07		D3DV26	10171		E7EPA6	6.9e-07		E5RJD2	1.7539e-07
B4E1E0	5.4499e-05		H0YJ21	0.00017871		E9PRH9	0.00086594		E9PC52	0.046		P68363	17074		C9JZ20	2.9237e-05		C9JA36	13107		G1UI21	0.017757		E2DTL8	0.0042446		D3DVC4	2.4e-06		E7EQR4	36439		E7ENX0	0.014142
B4E1L0	1.9278e-07		H0YJE4	0.00022892		F4ZW62	0.00010155		E9PH82	5e-07		P69849	6e-07		C9JZ81	0.00023355		C9JIG9	6.7e-06		G3V1A4	0.00010407		E2QRI1	0.00014623		D3DVQ1	2.6e-06		E7ER27	7.5e-07		E7EP04	5.6648e-07
B5BUB5	0.0060401		H0YJI8	8.4303e-08		F4ZW63	0.00010155		E9PII3	2.7e-06		P78527	65874		D1MGQ2	1.0322e-07		C9JJ34	0.00055		G3V1U5	1.824e-07		E4W6B6	7.2129e-08		D3DWL0	5.4e-06		E7EU96	7e-08		E7EPA6	0.0068648
B5BUE6	0.00031127		H0YNX6	3.7818e-08		F4ZW64	0.00014182		E9PKU7	8.3e-05		Q00325	2.6e-07		D3DP78	1.8596e-07		C9JJT5	9.2e-07		G3V2K7	4.105e-08		E5KMI6	2.6003e-07		D3DXJ4	4.1e-06		E7EW37	0.00058		E7EPD2	2.5215e-07
B7Z1X9	1.8109e-06		H3BNP9	0.00025188		F4ZW65	0.00014182		E9PLC4	0.077		Q03252	8.9e-07		D3DR22	0.0034321		C9JNK6	1.6e-06		G3V4X6	6.8923e-08		E5RG29	2.6258e-07		D6R9F8	6.3e-05		E7EX44	4e-07		E7EQR4	0.0049178
B7Z2E6	0.00057163		H3BPK7	6.8923e-08		F4ZW66	0.00014182		E9PNH1	6.6e-07		Q05BR2	0.00093		D3DRR6	0.0031204		C9JPC3	6.2e-05		G3V5G2	5.6071e-05		E5RH09	2.5543e-05		D6R9W4	1.3e-06		E9PAV3	2.3e-07		E7ER44	2.2594e-05
B7Z6B3	0.00045593		H3BS10	0.00010672		F5GY56	5.1814e-06		E9PNV3	0.00082		Q05CU6	23318		D3DTW3	0.00053939		C9JUP7	5.9e-05		G3V5M2	7.7892e-08		E5RI98	0.016643		D6RCP9	9.8e-06		E9PB61	5e-07		E7ERC4	0.0012397
B7Z6K2	1.1795e-07		H3BTN5	0.0091363		F5GYZ5	2.643e-05		E9PSI0	5.5e-06		Q09161	24427		D3DUG9	1.2876e-07		C9JZ20	7.6e-05		G3XAM7	1.3912e-05		E5RJD2	1.7539e-07		D6RDA2	77765		E9PBF6	7e-08		E7ESS4	0.027957
B7Z9I1	3.2845e-07		H3BU13	0.0033755		F5GZ03	0.00075041		F2YGG7	7.8e-06		Q0D2Q6	6.4e-07		D3DUW6	0.00099202		C9JZR2	2.7e-05		G5E972	5.3377e-08		E7EMS6	2.3788e-07		E1NZA1	9.9e-05		E9PCX2	8.9e-07		E7ESV4	0.00018558
B7ZKK7	0.0018777		H7C597	1.405e-07		F5H0C8	9.4301e-05		F2Z2V0	0.28		Q0VGA5	40683		D3DVQ1	2.0703e-07		C9K055	1.3e-06		G5EA09	8.7734e-08		E7ENX0	0.0056723		E1P5S2	7.3e-06		E9PDF2	6.9e-07		E7ETZ4	1.962e-07
B7ZKY6	0.0026276		I3L3E9	0.0036797		F5H265	0.00013124		F2Z2Y4	0.057		Q0VGD6	7.5e-07		D6RAX7	2.0098e-07		D1MGQ2	1.4e-06		G9K388	1.8644e-06		E7EPA6	3.7582e-06		E2QRI1	27421		E9PEX6	16123		E7EU96	1.1111e-07
B7ZLE5	7.8115e-05		I6L957	0.0027671		F5H3C5	2.643e-05		F2Z3J9	2.6e-06		Q10471	18777		D6RD18	0.00021669		D3DNF9	13107		G9K389	1.8644e-06		E7EPD2	2.0201e-06		E4W6B6	40683		E9PFN5	6342		E7EWE5	6.901e-05
B7ZW00	0.0018777		I6LPK7	9.3827e-08		F5H4R2	2.643e-05		F4ZW63	0.027		Q10713	14787		D6RD66	0.00028856		D3DP75	5.3e-06		H0Y2W2	0.016097		E7EQR4	1.3046e-07		E5KMI6	0.00019		E9PG39	4.4e-06		E7EX29	1.0191e-05
B8Y0L3	2.889e-07		I6TRR8	9.7523e-08		F5H6I7	2.2969e-08		F4ZW64	3.7e-06		Q12797	7.7e-07		D6RDG7	4.934e-05		D3DPG0	1.4e-06		H0Y368	7.6073e-08		E7ER44	5.2361e-08		E5KNY5	5.6e-05		E9PGX9	54522		E7EX90	3.9262e-07
B8ZZL6	1.1934e-07		J3KQL8	0.024669		F5H6P7	0.00012428		F4ZW65	3.7e-06		Q12907	1044		D6RDU5	6.7437e-05		D3DR22	98183		H0Y3Z3	0.0064636		E7ESS4	1.6865e-07		E5RI16	5e-07		E9PH38	8e-05		E9PBF6	0.0018278
B9EG90	0.0062708		J3KRY1	1.835e-07		F5H6T1	5.3401e-05		F4ZW66	3.7e-06		Q13148	7e-08		D6RDX1	5.475e-05		D3DTW3	31492		H0Y4J6	7.606e-08		E7ESV4	5.3771e-07		E5RK62	5e-07		E9PI86	8.4e-07		E9PCR7	0.0045895
B9VP19	0.0002605		J3QLE9	1.1669e-05		F5H6U7	2.148e-06		F5CTF3	9.8e-06		Q13228	6.6e-07		D6RGI3	0.00066203		D3DV26	0.00028		H0Y7Z1	3.6744e-05		E7ETZ4	3.0547e-07		E7ENL6	4.1e-06		E9PMA0	2.7e-07		E9PFD4	2.5322e-07
C4P0D4	3.692e-07		J3QLI9	1.3744e-07		F6IQ84	9.7833e-05		F5H0C8	0.0008		Q13492	1.2e-06		D6RGY2	0.0001344		D3DVC4	2e-07		H0Y875	0.0096382		E7EU96	1.6264e-07		E7EQT5	36573		E9PN25	0.00044		E9PFN5	6.3471e-06
C7DJS2	0.0025085		J3QLR1	0.00045847		F6KPG5	8.9806e-05		F5H1Y3	0.31		Q13813	4.7e-06		D6RJI2	0.00059001		D3DVQ1	9.6e-06		H0Y8X7	0.00015127		E7EW37	2.2042e-05		E7EQW5	0.0006		E9PNV3	0.00056		E9PG15	0.00074483
C9IZL7	8.5539e-06		J7M2B1	7.8435e-08		F6RFD5	0.00021937		F8VRN8	0.00051		Q14222	36454		D6W5E6	0.00019545		D3DWL0	1.6e-06		H0Y8Z9	0.0061452		E7EWE5	0.0002229		E7ET15	7.8e-06		E9PP27	1.5e-05		E9PI21	3.5926e-05
C9J3N8	3.2086e-05		K7EJ44	0.0036047		F6UJC5	2.7429e-08		F8VSL7	6.6e-06		Q14455	7e-08		E2DRY6	0.00022856		D3DX26	12481		H0Y9K1	0.00033111		E7EX29	4.1296e-05		E9KL35	26911		E9PPQ4	23793		E9PJH8	6.0901e-05
C9J4N6	1.3619e-06		K7EJE8	3.6512e-05		F8VR77	0.00029654		F8VYZ4	0.068		Q14666	3.3e-07		E2DTL8	1.7844e-07		D6R9F8	1.1e-06		H0YCC6	0.0010986		E7EX90	3.9262e-07		E9PAV3	21067		E9PPQ8	6.6e-07		E9PMD4	6.6404e-07
C9JA36	0.005815		K7EKE6	3.6512e-05		F8VZB1	2.6812e-05		F8W026	0.00092		Q15046	6e-07		E2QRI1	0.00032467		D6RBV2	32908		H0YD14	0.00016652		E9PCR7	3.9248e-05		E9PBS1	16118		E9PPR5	7.7e-07		E9PMD7	0.024608
C9JDR0	0.00013274		K7EKL8	6.6909e-08		F8W026	0.00029216		F8W0A3	0.053		Q15393	5.1e-06		E4W6B6	3.4665e-06		D6RCP9	3.7e-06		H0YDG0	3.2104e-05		E9PEF9	5.5696e-08		E9PC52	49267		E9PQJ2	2.7e-05		E9PMV1	1.7544e-05
C9JJ34	0.0064476		K7EL50	6.7008e-05		F8W1G0	3.7106e-05		F8W8W4	1.2e-06		Q15404	5.3e-06		E5KMI6	5.0132e-05		D6RDG7	3.4e-05		H0YDL9	5.5325e-05		E9PFD4	3.398e-07		E9PII3	4e-05		E9PRB9	9.5e-06		E9PNF7	0.00017088
C9JNK6	2.5371e-07		K7EL56	9.7869e-05		F8W6C1	0.00014581		F8WB65	0.0053		Q15435	3.9e-07		E5RG29	2.6258e-07		D6RGI3	69699		H0YDS9	0.00077144		E9PFF2	0.010674		E9PKU7	1.5e-05		E9PRH9	10031		E9PNV3	2.4011e-07
C9JPC3	1.6267e-08		K7ELR7	1.5251e-05		F8W7S5	0.00015158		G1UI16	7e-07		Q15758	49698		E5RI98	3.8766e-05		D9HTE9	5.4e-07		H0YE29	8.0468e-08		E9PFN5	0.00016677		E9PLC4	11515		F1T0B3	1.2e-06		E9PNW4	0.00016462
C9JTK6	5.0719e-05		K7EM90	0.0019524		F8WE04	0.02034		G1UI32	0.057		Q16187	2.7e-07		E5RJD2	1.7539e-07		E0WN24	48009		H0YEP8	0.003112		E9PG15	6.4854e-05		E9PNH1	7.6e-05		F2Z2I8	0.00042		E9PP27	0.0018473
C9JUG7	0.004787		K7EME0	0.00023103		F8WEF0	6.8785e-08		G3V2F7	0.0084		Q16222	3.2e-07		E7EMS6	2.3788e-07		E1NZA1	8.7e-07		H0YER7	0.011315		E9PI21	0.00090421		E9PNV3	83256		F2Z393	9.2e-07		E9PPQ4	8.7973e-05
C9JUP7	0.0012547		K7EN66	1.9129e-07		F8WF86	3.7106e-05		G3V5M2	0.59		Q16555	54063		E7ENX0	0.00033487		E1P5S2	8e-07		H0YF33	0.0018777		E9PJC6	1.4953e-05		E9PS48	12622		F4ZW63	8.2e-07		F4ZW62	0.0020953
C9JZ20	4.6126e-06		K7EPF6	1.5964e-05		G3V0E5	4.8226e-05		H0Y659	3.6e-06		Q16576	4.2e-07		E7EP04	2.6289e-07		E2QRI1	71678		H0YF61	7.2808e-08		E9PJH8	0.0025266		E9PSI0	8.5e-06		F4ZW65	8.4e-07		F4ZW63	0.0020953
C9JZR2	0.00017359		K7EPV9	5.8499e-08		G3V1A4	0.00010583		H0Y9K1	9.9e-06		Q16706	2.4e-06		E7EPA6	0.012275		E4W6B6	1.6e-05		H0YFC6	4.4944e-06		E9PMV1	1.1617e-07		F2YGG7	7.8e-06		F4ZW66	8.4e-07		F4ZW64	0.0039668
D1MGQ2	0.013869		K7ER27	9.804e-08		G3V1U5	7.9133e-06		H0YAB0	0.0041		Q16881	1.2e-06		E7EPD2	1.1597e-07		E5KMI6	8.7e-07		H0YFD6	0.0012195		E9PNF7	0.0021009		F2Z3J9	3.5e-06		F5GWF8	19132		F4ZW65	0.0039668
D3DNF9	0.005815		K7ESA3	6.7668e-08		G3V2J8	0.0056336		H0YCK3	7.3e-06		Q1LZN2	6e-07		E7EQR4	0.00011282		E5KNY5	6.2e-07		H0YG07	6.9952e-08		E9PNH1	1.0886e-05		F4ZW64	0.0005		F5GXD8	7e-05		F4ZW66	0.0039668
D3DP75	5.4988e-07		O00116	1.3656e-07		G3V2K7	1.7838e-05		H0YCR7	1.7e-06		Q2F831	14191		E7ERC4	0.00010618		E5RFP6	50615		H0YGR4	8.2677e-08		E9PNW4	1.2921e-07		F4ZW65	0.0005		F5GZI0	7.6e-07		F5GY56	0.00034515
D3DPG0	2.4796e-07		O00264	0.00025954		G3V2R6	6.5832e-05		H0YCU9	0.31		Q2TNB3	5.1e-07		E7ESS4	0.00036982		E5RI98	18624		H0YH27	0.019363		E9PP27	0.00017132		F4ZW66	0.0005		F5GZN3	0.00099		F5GYN4	0.0039844
D3DQH8	0.0052142		O00461	1.526e-07		G3V325	5.3592e-06		H0YDG0	6.9e-06		Q2TTR7	60721		E7ESV4	4.618e-06		E5RK62	4245		H0YJ21	3.1844e-07		E9PPQ4	1.3328e-07		F5CTF3	9.8e-06		F5H0C8	3.9e-06		F5GYZ5	1.0049e-06
D3DR22	4.8798e-06		O14929	7.8435e-08		G3V5B3	0.0027691		H0YDN1	3.7e-06		Q32Q10	5.3e-06		E7EU96	8.9517e-08		E7ENL6	5.6e-06		H0YJE4	0.0058483		E9PRH9	7.0231e-06		F5GYU3	85344		F5H136	0.00045		F5GZ03	0.025934
D3DTW3	0.0012292		O14942	0.00010606		G3V5G2	0.00053778		H0YFA9	7e-07		Q3B7X1	90954		E7EW37	0.00039896		E7EQT5	27359		H0YJI8	9.0297e-05		F4ZW64	7.6436e-08		F5H0C8	15174		F5H2V6	9e-07		F5H0C8	1.1289e-07
D3DUG9	2.5983e-07		O14967	0.011593		G5E972	2.3116e-08		H0YIV0	0.00045		Q3BDU5	1.4e-07		E7EWE5	0.00015245		E7EQW5	8.3e-05		H0YLU2	6.8402e-06		F4ZW65	7.6436e-08		F5H1Y3	17757		F5H6U7	8.7e-06		F5H1S8	2.6353e-07
D3DUL8	2.2371e-07		O14983	1.3776e-07		G5EA09	0.00023238		H0YJZ8	7.3e-06		Q3LIE9	1.2e-06		E7EX29	6.485e-06		E7ET15	2e-06		H0YMI6	1.8378e-06		F4ZW66	7.6436e-08		F5H6N1	42813		F5H6X6	0.00045		F5H265	0.0043949
D3DV26	0.010247		O14992	0.00026596		G8I0M6	3.2375e-08		H0YMU3	3.8e-06		Q3LIF4	0.00031		E7EX90	0.00079299		E7EU96	17045		H0YNA5	5.6759e-08		F5GY56	4.5264e-07		F6RFD5	13373		F6VDH7	6.5e-07		F5H2F4	0.00059347
D3DVC4	0.01653		O15031	1.4978e-07		G8JLJ2	4.7406e-05		H3BLZ8	0.09		Q49A78	5e-08		E9KL35	0.014638		E9KL35	59745		H0YNX6	1.0563e-05		F5GYN4	2.0706e-07		F8VRN8	29041		F8VSL7	72797		F5H3C5	1.0049e-06
D3DWL0	0.002276		O60568	3.7346e-06		G9K389	0.00023222		H3BMS6	0.095		Q4G148	11449		E9PBF6	0.00013454		E9PAV3	11398		H3BNP9	0.0073594		F5GYZ5	3.5047e-06		F8VSL7	6e-06		F8VUX1	3309		F5H4R2	1.0049e-06
D3DX26	0.021749		O75083	1.2544e-07		H0Y2W2	5.9298e-08		H3BND4	2e-07		Q4LE79	5.6e-06		E9PBS1	0.00012349		E9PC52	3.4e-05		H3BPK7	0.00074406		F5GZ03	0.012102		F8VYY9	2e-07		F8VVA7	2e-06		F5H6I7	1.4084e-07
D3DXJ4	2.8084e-07		O75322	3.9659e-05		H0Y368	3.4366e-06		H3BRK3	0.007		Q4W4Y1	3.8e-06		E9PCR7	0.00051882		E9PII3	5.8e-05		H3BRK3	9.1135e-08		F5H0C8	1.1289e-07		F8VYZ4	18271		F8VWV4	0.00033		F5H6P7	1.8454e-07
D6R9F8	1.5407e-07		O75396	1.4787e-07		H0Y394	0.010799		H6WCP5	2e-07		Q53EM5	16316		E9PEF9	0.0013932		E9PKU7	1.3e-05		H3BS10	0.00012961		F5H265	5.3552e-05		F8W026	0.00038		F8VXH9	5.8e-07		F5H6T1	0.015523
D6R9W4	4.2591e-07		O75546	1.9278e-07		H0Y512	1.8869e-06		H7BZ20	0.0028		Q53ES0	28112		E9PFF2	0.00049826		E9PLC4	3.2e-05		H7BY16	0.018306		F5H2F4	1.1115e-07		F8W8W4	4.8e-06		F8VZB1	0.00084		F5H6U7	4.1206e-05
D6RBV2	0.037926		O75746	1.9045e-05		H0Y548	0.00086246		H7BZT7	0.4		Q53FB0	27659		E9PFN5	1.2453e-05		E9PNH1	9.7e-05		H7BZ20	6.4306e-08		F5H3C5	3.5047e-06		G1UI16	0.00085		F8W1K5	69819		F5H783	0.0029557
D6RCP9	2.976e-07		O75944	4.9237e-08		H0Y687	0.00013291		H7C1D4	0.0044		Q53FG3	51046		E9PG15	1.9775e-05		E9PNV3	96271		H7C1F6	7.8435e-08		F5H4R2	3.5047e-06		G3V2F7	0.00059		F8W651	2e-06		F6IQ84	0.00033221
D6RDA2	1.9467e-05		O94826	1.471e-07		H0Y6E7	0.00053588		H7C3A1	3.7e-06		Q53FN7	77765		E9PI21	5.1243e-07		E9PRM1	3.8e-06		H7C3V6	7.1675e-08		F5H6I7	2.352e-07		G5E9E9	79462		F8W8T1	11073		F6KPG5	1.6456e-05
D6RDG7	1.433e-05		O94874	0.0031488		H0Y6T7	0.00011184		H7C4W4	5.4e-06		Q53FR4	77765		E9PJC6	0.0039943		E9PS48	8.9e-05		H7C4W4	7.8435e-08		F5H6P7	1.8454e-07		G5EA09	6.9e-06		G1UI16	2e-07		F6RFD5	1.0776e-07
D6RGI3	2.6658e-05		O94925	0.0064476		H0Y7G9	4.5127e-08		H7C597	6.9e-06		Q53G34	8.9e-06		E9PJH8	9.8176e-05		E9PSI0	2.7e-06		I1SRC5	9.3895e-08		F5H6T1	0.00037543		G9K388	41327		G1UI21	0.00051		F6UJC5	9.3013e-08
D6RJI2	4.6328e-05		O95202	1.1166e-07		H0Y8C6	0.017531		I6L957	0.006		Q53GE3	14483		E9PMD7	0.000134		F2YGG7	2e-06		I1VE18	3.2335e-08		F5H6U7	0.00038061		H0Y449	35931		G3V1A4	34729		F8VRE9	1.4901e-07
D6W539	0.00016123		O95479	9.3895e-08		H0Y8W2	0.00082451		I6L9E8	5e-07		Q53GN4	7.5e-07		E9PMV1	0.00021085		F2Z3J9	2.5e-06		I6LPK7	2.8774e-05		F5H783	7.4558e-06		H0Y4Y4	10247		G3V1U5	8.7e-06		F8VVM2	9.5512e-07
D6W5E6	0.00066222		O95782	6.3105e-08		H0Y983	0.00027171		I6L9I5	0.65		Q53GY0	64476		E9PN89	0.00034398		F4ZW64	2.4e-07		I6TRR8	0.014787		F6IQ84	0.00015727		H0Y512	24669		G3V2J8	0.0006		F8VZB1	2.4194e-05
D9HTE9	0.012139		P02765	1.1795e-07		H0Y9K7	6.3037e-05		I6TRR8	4.7e-06		Q53HA4	40683		E9PNF7	4.4363e-05		F4ZW65	2.4e-07		J3KQL8	0.024669		F6KPG5	5.4093e-06		H0Y5E8	17193		G3V2K7	1.5e-06		F8VZQ9	8.0717e-07
E0WN24	2.1959e-07		P05161	8.5088e-08		H0Y9X5	0.00041087		J3KN16	4.1e-06		Q53HH2	0.00076		E9PNH1	0.00028398		F4ZW66	2.4e-07		J3KRY1	4.0902e-08		F6RFD5	1.0776e-07		H0Y659	3.6e-06		G3V2Y4	0		F8W026	0.0028436
E1NZA1	0.00019678		P07954	0.0038277		H0YB24	0.00017418		J3KNE0	9.7e-06		Q53HK8	7e-08		E9PNV3	0.0055869		F5CTF3	3.7e-06		J3QLE9	0.0039785		F6UJC5	1.4909e-07		H0Y7L7	6.9e-06		G3V3E6	0.00084		F8W1G0	1.9499e-07
E1P5S2	2.976e-07		P09382	2.6795e-07		H0YD14	0.00024818		J3KPD9	0.47		Q53T76	10276		E9PNW4	1.819e-05		F5GYU3	0.00088		J3QLI9	9.0054e-08		F8VR77	1.2094e-07		H0Y8W2	19867		G3V5G2	4.2e-06		F8W1N5	1.564e-07
E2DRY6	0.0036585		P09914	7.6556e-08		H0YDD4	0.0030005		J3KPM9	1.6e-05		Q569J8	15065		E9PP27	0.0002074		F5H6N1	3e-07		J3QLR1	0.00027182		F8VRE9	8.8273e-05		H0Y9K1	0.00047		G3V5M2	7.2e-06		F8W6C1	1.7494e-05
E2QRI1	4.93e-06		P10768	6.4306e-08		H0YDG0	0.00056808		J3KQL8	2.8e-06		Q59EI9	19543		E9PPQ4	4.6745e-06		F6RFD5	3.9e-07		J3QSA3	5.2617e-05		F8VVM2	8.488e-05		H0YAB0	20824		G3XAM7	7e-08		F8W7S5	0.006709
E4W6B6	0.00083172		P11279	0.00027675		H0YE04	4.0529e-05		J3KRI4	0.0031		Q59EL5	8e-07		E9PRH9	0.001129		F8VYZ4	8.5e-05		J3QSB7	9.7523e-08		F8VZB1	0.00049776		H0YCJ8	8e-07		G5E972	4.9e-06		F8WE04	4.9379e-08
E5KMI6	0.0002605		P11717	1.3872e-07		H0YF61	5.0265e-08		J3KS22	4.8e-06		Q59ES3	47014		E9PSI0	3.8048e-07		F8VZX2	18453		J7FRP4	1.0162e-07		F8W026	5.3096e-06		H0YCK3	0.00072		G9K388	5.4e-05		G3V1A4	1.7151e-05
E5KNY5	4.6966e-05		P12111	1.7776e-07		H0YFA9	0.00026285		J3QL56	4.8e-06		Q59EV6	35152		F4ZW62	3.9109e-05		F8W026	0.00065		J7M2B1	7.8435e-08		F8W1G0	1.9499e-07		H0YCR7	5.4e-06		G9K389	5.4e-05		G3V1U5	0.00027537
E5RFP6	0.0028693		P14324	0.00011397		H0YFD6	0.00015272		J3QS36	4.8e-06		Q59F25	7.6e-06		F4ZW63	3.9109e-05		F8W8W4	1.3e-06		K7EJ44	6.3833e-06		F8W1N5	1.8596e-07		H0YDG0	0.0007		H0Y2W2	0.00042		G3V2R6	7.3179e-07
E5RI98	2.1111e-05		P15924	1.5558e-07		H0YFI1	5.0338e-06		J7M2B1	0.0027		Q59F44	1.1e-06		F4ZW64	0.00027537		F8WD96	0.00087		K7EL50	0.003613		F8W6C1	1.51e-07		H0YDN1	3.7e-06		H0Y368	2.3e-06		G3V5G2	0.00024148
E5RK62	0.0051319		P15927	0.0022379		H0YHM6	0.00023334		K7EN27	0.05		Q59FF0	94967		F4ZW65	0.00027537		G1UI16	4.1e-06		K7EL56	0.00090145		F8W7S5	1.2197e-07		H0YE29	87823		H0Y3Z3	0.00055		G3V5M2	2.8234e-07
E7ENH5	0.0019477		P17655	1.526e-07		H0YHV5	0.0017111		K7ENY6	0.7		Q59FI0	1316		F4ZW66	0.00027537		G3V2F7	6.8e-06		K7EN27	4.4381e-08		F8WE04	1.8778e-05		H0YF61	12495		H0Y4J6	5.3e-06		G3V5T9	2.7228e-07
E7ENL6	0.0018777		P19525	9.7523e-08		H0YIV0	0.00020248		K7ER00	0.045		Q59FV6	14504		F5GY56	1.2634e-05		G3V3E6	112		K7EN66	6.475e-08		F8WF86	8.4057e-07		H0YFA9	0.00071		H0Y4Z6	15351		G3XAK4	1.3271e-07
E7EQT5	2.0233e-06		P19823	0.0077765		H0YIZ0	0.0023488		K7ER96	0.097		Q59G75	1.2e-06		F5GYN4	3.9646e-05		G3V5M2	2.4e-06		K7EPV9	0.0082361		G3V0E5	1.377e-07		H0YIV0	0.00045		H0Y5F5	5.8e-07		G3XAM7	5.7941e-07
E7EQW5	6.3724e-06		P20700	0.017757		H0YJI8	5.0599e-05		K9MS24	5e-07		Q59GX5	89576		F5GYZ5	2.1996e-05		G5E9E9	7.5e-07		K7ERA3	1.2078e-07		G3V1A4	4.9304e-05		H0YJZ8	7.3e-06		H0Y7R7	0.00091		G5E972	3.5562e-06
E7ES33	0.0018777		P21399	8.0468e-08		H0YKK6	0.0004182		L0EQ52	7.8e-06		Q59H15	20783		F5GZ03	0.00011181		G9K388	4.7e-05		K7ESA3	7.1675e-08		G3V1U5	0.00036716		H0YKT8	19336		H0Y7Z1	9.9e-05		G5EA09	1.3328e-07
E7ET15	0.0049198		P23246	1.0844e-05		H0YKS8	0.00019505		M0QXF7	0.027		Q59H94	7e-08		F5H0C8	0.023557		H0Y449	1027		K7X1S0	7.6556e-08		G3V2J8	3.7528e-05		H0YL69	85239		H0Y875	0.00097		G8FSY7	0.0057713
E7EU96	0.001631		P26022	0.0013842		H0YKT6	2.2969e-08		M0QYE0	3.3e-06		Q5H928	5e-07		F5H265	0.0023054		H0Y4R4	1254		L0R849	0.0077765		G3V2K7	3.0683e-06		H0YMU3	1.6e-06		H0Y8X7	12735		G8JLJ2	1.4997e-06
E7EUT5	2.8756e-05		P28331	0.00012495		H0YKT8	8.9162e-05		M0QYR1	0.086		Q5I6Y5	1.4e-07		F5H2F4	0.00042887		H0Y4Y4	8.6e-06		L8B4R0	7.966e-05		G3V2R6	0.0015619		H3BLU7	16232		H0Y8Z9	0.00058		G9K389	1.0487e-05
E9KL35	6.0642e-05		P30085	1.4097e-07		H0YLU7	5.1313e-05		M0R0K9	0.12		Q5JTV8	15535		F5H3C5	2.1996e-05		H0Y5E8	1.9e-06		M0QYN0	3.8031e-08		G3V325	2.6978e-07		H3BMS6	31318		H0Y983	0.00081		H0Y2L7	3.9869e-07
E9PAV3	2.9584e-05		P30613	0.0062708		H0YMA0	4.991e-05		O00116	6.9e-06		Q5JYX0	68309		F5H4R2	2.1996e-05		H0Y659	9.3e-06		M0QZS6	0.00090837		G3V5B3	0.0013641		H3BND3	39468		H0Y9K1	3e-07		H0Y2W2	1.1559e-07
E9PBS1	2.9573e-06		P31150	8.0468e-08		H0YMA1	0.0023026		O00764	0.057		Q5M7Z5	15535		F5H6I7	8.6936e-08		H0Y8W2	3.7e-05		M0R1V7	9.1438e-05		G3V5G2	2.0408e-07		H3BND4	2e-07		H0YBG6	1.4e-05		H0Y368	0.00070999
E9PC52	1.2847e-07		P31939	7.4813e-08		H0YNA5	4.0198e-05		O14660	7.8e-06		Q5TBR1	49698		F5H6P7	1.8454e-07		H0Y9K1	7.6e-05		M0R268	1.1236e-07		G3V5M2	2.8234e-07		H3BT58	14787		H0YCC6	5.3e-05		H0Y394	1.2756e-05
E9PII3	0.00013286		P32004	1.1166e-07		H3BNU3	0.004369		O14715	9.7e-06		Q5U5J2	7e-08		F5H6T1	4.6318e-07		H0Y9Q1	27957		M0R389	1.0162e-07		G3V5T9	2.7228e-07		H3BTN5	26168		H0YD14	1.8e-07		H0Y512	1.1928e-06
E9PJH8	6.8979e-06		P35580	6.6527e-08		H3BNV2	3.0873e-08		O14942	0.00043		Q5VSR5	4.3e-07		F5H6U7	8.538e-05		H0YCJ8	1.3e-06		O00116	1.2228e-07		G3XAK4	1.0672e-07		H6WCP5	2e-07		H0YDG0	6.8e-07		H0Y548	1.8559e-05
E9PKU7	0.0024727		P37108	1.1166e-07		H3BS10	0.00015513		O14943	7.8e-06		Q5VXV3	20014		F5H783	0.00010191		H0YCK3	2.5e-06		O00264	2.6116e-06		G5E972	2.4652e-06		H7BZ20	13998		H0YDL9	83162		H0Y687	0.0011006
E9PLC4	7.5067e-05		P37802	1.9324e-07		H3BU78	0.0001869		O14980	5.1e-06		Q6DC98	7e-08		F6IQ84	0.00021008		H0YCR7	1.3e-06		O00461	0.00036439		G5EA09	0.0041469		H7C0A3	32835		H0YDS9	10031		H0Y6E7	0.0048646
E9PNH1	0.017757		P38606	7.7042e-08		H3BUK7	0.0039116		O14992	6e-07		Q6FHE4	90227		F6KPG5	0.011048		H0YCU9	0.00044		O00560	8.7734e-08		G8FSY7	0.00079798		H7C1D4	3367		H0YE29	2.8e-06		H0Y6T7	0.00090206
E9PNV3	4.7946e-05		P40261	1.3451e-07		H7BY16	0.00011368		O15067	6e-06		Q6FHK8	5e-08		F6RFD5	3.456e-05		H0YDG0	6.8e-07		O14967	0.030393		G8JLJ2	2.7449e-06		H7C3A1	6e-05		H0YEP8	0.00093		H0Y7G9	9.5555e-08
E9PRQ6	0.0019271		P41250	0.001071		H7BZG0	0.00031052		O43169	0.029		Q6FHP5	1071		F6UJC5	7.4515e-08		H0YDN1	9e-07		O14983	0.010222		G9K389	0.00060921		H7C4W4	7.3e-06		H0YER7	0.00036		H0Y7L7	2.0706e-07
E9PS48	1.2679e-05		P41252	1.044e-07		H7C0A3	0.00052076		O43776	0.0015		Q6FHU3	6.1e-06		F8VR77	0.0017354		H0YF61	2.5e-06		O14992	0.0030888		H0Y2L7	3.9869e-07		H7C597	0.00044		H0YF33	10031		H0Y875	0.0055263
E9PSI0	0.00017871		P43307	0.00027307		H7C0R3	0.0024107		O60282	8.7e-06		Q6I9V5	19543		F8VRE9	0.00015378		H0YFA9	7866		O15031	1.4978e-07		H0Y2W2	1.675e-07		H9KVC9	2053		H0YFA9	2e-08		H0Y8C6	0.0023118
F2YGG7	0.0019625		P46783	1.8312e-08		H7C1D4	0.00011629		O60518	1.7e-06		Q6IBN1	30274		F8VVM2	1.6343e-06		H0YIV0	0.00087		O15400	7.0255e-08		H0Y368	4.4755e-07		I1SRC5	14592		H0YFC6	11741		H0Y8W2	1.7783e-06
F2Z2V0	0.0019477		P46940	0.00053654		H7C1F6	2.4997e-08		O75322	0.00026		Q6IBP2	7.7e-07		F8VZB1	3.0316e-05		H0YJZ8	2.5e-06		O43681	9.7523e-08		H0Y394	1.6293e-07		I1VE18	25085		H0YFD6	0.00011		H0Y9K7	0.012839
F2Z2Y4	2.1096e-05		P49189	0.021548		H7C2C5	1.558e-05		O75367	0.0009		Q6MZI6	5.1e-06		F8W026	0.00055087		H0YKT8	2.5e-05		O43854	8.5088e-08		H0Y512	2.2836e-06		I6L957	28608		H0YGR4	6e-07		H0Y9X5	0.0016419
F2Z393	4.1374e-05		P49736	1.6038e-07		H7C367	0.00585		O75475	0.0001		Q6NTA2	3.9e-07		F8W1G0	0.00065917		H0YL69	3.9e-05		O75396	2.6541e-06		H0Y548	3.7046e-05		I6L9I5	38615		H0YH27	0.00018		H0YAB0	4.977e-05
F4ZW63	0.00090452		P49748	0.019439		H7C3V5	3.1053e-05		O75546	7.8e-06		Q6NVC0	1071		F8W6C1	0.0003854		H0YLU2	0.0005		O75546	1.1166e-07		H0Y687	3.8315e-08		I6LPK7	27142		H0YHM6	5.8e-07		H0YAB3	7.5675e-07
F4ZW64	0.013024		P52292	0.00028336		H7C4G5	0.00099018		O75828	0.009		Q6NWZ1	1653		F8W7S5	0.0012962		H0YMU3	2.9e-06		O75746	0.017082		H0Y6E7	0.00012475		I6TRR8	0.00019		H0YIC4	0.00034		H0YB24	5.8604e-05
F4ZW65	0.013024		P53597	0.0077765		H7C597	0.0054022		O76003	0.0038		Q6NZI2	12986		F8WE04	3.8254e-06		H3BLU7	17509		O75880	8.0468e-08		H0Y6T7	0.00051301		J3KN16	0.00068		H0YIV0	4.2e-05		H0YCU9	7.8594e-05
F4ZW66	0.013024		P53618	8.2516e-05		H7C5W9	4.9597e-05		O94855	8.6e-06		Q6P0M4	1.2e-06		F8WEF0	2.1297e-07		H3BLZ8	17702		O75944	0.0003238		H0Y7G9	1.3271e-07		J3KNE0	9.7e-06		H0YJ21	7.6e-06		H0YD14	0.0014605
F5CTF3	2.976e-07		P54136	0.014787		I1VE18	1.0847e-05		O94874	6.9e-06		Q6PIX2	15384		F8WF86	9.007e-05		H3BMS6	6.3e-06		O94826	9.0653e-08		H0Y7L7	2.0706e-07		J3KNQ4	6377		H0YJE4	7.5e-07		H0YDD4	0.0030362
F5GYU3	0.00029057		P54727	9.7523e-08		I3L398	0.0033333		O94925	0.0086		Q6PJ76	13613		G3V0E5	0.00026938		H3BND3	1.4e-06		O95138	0.0024059		H0Y875	0.0026855		J3KPD9	42553		H0YJI8	4.3e-07		H0YDG0	0.00088827
F5H0C8	1.433e-05		P54886	8.7734e-08		I3L3E9	0.0030676		O95202	2.6e-06		Q6PJY7	52765		G3V1A4	6.239e-05		H3BND4	2.3e-07		O95571	6.6485e-08		H0Y8C6	1.687e-05		J3KPM9	0.00016		H0YKD0	7.4e-07		H0YE04	4.8765e-05
F5H1Y3	0.017757		P55290	2.1385e-05		I3L3M7	0.0054241		O95347	6.6e-06		Q6PKD2	79462		G3V1U5	3.2161e-07		H3BRK3	7.2e-05		O95782	0.00025681		H0Y8W2	0.00066924		J3KQL8	9e-07		H0YLU2	19813		H0YE29	0.00015077
F5H6N1	0.00010349		P61026	0.0039052		I3L3U9	3.3371e-06		O95373	0.00036		Q6S8J3	10345		G3V2J8	0.00045975		H3BT58	15378		P00492	9.7523e-08		H0Y983	0.0036155		J3KRI4	42843		H0YMI6	0.00034		H0YER7	9.5261e-05
F5H783	2.3018e-05		P61163	0.0017505		I6L957	0.00012819		O95654	4.1e-06		Q6TXQ4	11535		G3V2K7	1.6887e-07		H6WCP5	2.3e-07		P01116	9.3895e-08		H0Y9K7	4.972e-06		J3KS22	4.8e-06		H0YNA5	7.1e-06		H0YFD6	0.00096591
F6RFD5	0.00055829		P63096	3.5788e-08		I6YID7	0.0062735		O95831	8.9e-06		Q7L4M3	29599		G3V2R6	1.257e-05		H7BY58	6.7e-05		P02765	1.1795e-07		H0Y9X5	8.8513e-06		J3QKN0	41114		H0YNX6	10645		H0YFI1	2.5804e-07
F8VRN8	3.4498e-05		P67809	0.001071		J3JZZ9	3.098e-08		O96011	0.057		Q7L553	2936		G3V325	2.6978e-07		H7BZ20	0.00078		P02786	1.2543e-07		H0YAB0	0.00013409		J3QL56	4.8e-06		H3BNP9	1143		H0YHV5	3.0906e-05
F8VSL7	3.5422e-07		P68363	0.001071		J3KQE5	0.0017046		P00568	0.097		Q7RTM4	0.00031		G3V5B3	0.00084724		H7C0A3	2.8e-05		P04066	0.0061041		H0YB24	2.0029e-07		J3QS36	4.8e-06		H3BPK7	0		H0YJ40	1.8454e-07
F8VYY9	4.5019e-07		P78527	5.0569e-08		J3KRY1	0.005366		P02786	6.9e-06		Q7Z675	0.00044		G3V5G2	0.0043922		H7C1D4	4.6e-07		P06737	0.0037332		H0YCU9	1.1381e-07		J7FRP4	88458		H3BRK3	6.3e-06		H0YJ66	1.0653e-07
F8VYZ4	0.0030107		P80723	5.0111e-08		J3KTM9	0.00013928		P04183	0.061		Q86VG2	14144		G3V5M2	2.8234e-07		H7C3A1	9e-07		P09382	5.3248e-08		H0YD14	0.032541		J7M2B1	51546		H3BS10	76311		H0YKK6	1.3396e-05
F8VZX2	0.00044317		P84077	3.669e-08		J3QLE5	1.624e-05		P05023	6e-06		Q86XP3	4.2e-06		G3V5T9	2.7228e-07		H7C4W4	5.5e-07		P09486	0.022959		H0YDD4	0.0030605		K7EJ44	14971		H3BTN5	0.00065		H0YKS8	5.3147e-05
F8W026	0.026599		Q05193	6.1434e-08		J3QLL0	2.6164e-05		P05161	0.00079		Q8IUB0	51983		G3XAM7	1.9103e-07		H7C597	7.5e-07		P10619	1.0628e-07		H0YDG0	2.5031e-06		K7EN27	12776		H3BU13	16765		H0YKT6	1.564e-07
F8W0A3	3.6877e-06		Q05BR2	5.4822e-08		J3QSA3	0.00031407		P05186	8.1e-06		Q8N0Y7	4.3e-07		G5EA09	1.3328e-07		H9KVC9	1094		P10768	0.0018434		H0YE04	1.4883e-05		K7EQA9	12139		H3BU78	8e-05		H0YKT8	2.2394e-05
F8WB65	0.0030274		Q05CK9	0.024669		J3QTR3	0.00013124		P05362	4.8e-06		Q8N519	1.4e-07		G5EA31	2.2001e-07		I1SRC5	0.00034		P11717	1.3872e-07		H0YE29	2.6029e-07		K9MS24	0.00096		H7BY16	0.00052		H0YLU2	2.5804e-07
G1UI16	0.00084392		Q05CU6	9.0653e-08		J7M2B1	0.00073267		P06756	7.3e-06		Q8NBX0	7.7e-07		G8FSY7	8.2462e-05		I1VE18	8.5e-07		P12111	1.7776e-07		H0YER7	0.00071709		L8B4J3	77144		H7C3V6	8e-06		H0YLU7	7.6268e-05
G1UI32	2.1096e-05		Q05CW6	0.00023738		J9JIE6	1.6713e-08		P07910	0.022		Q8NF91	0.00031		G8I0M6	1.2208e-07		I6L965	99549		P14174	5.1528e-08		H0YFD6	0.016643		M0QXB4	33755		H7C597	4.1e-06		H0YMA0	3.0316e-07
G3V2F7	4.6029e-06		Q05D43	0.001071		K4DI93	0.0015337		P07954	0.068		Q8TAS6	98582		G8JLJ2	9.0068e-06		I6L9I5	8.4e-07		P14324	0.0066623		H0YFI1	2.5804e-07		M0QXB5	31467		I1VE18	3e-08		H0YMA1	8.881e-06
G3V3E6	0.00058555		Q05D48	9.4393e-08		K4DIE0	2.1944e-05		P07996	8.6e-06		Q8TC62	81845		G9K389	1.7933e-05		I6LPK7	1e-06		P15924	1.5558e-07		H0YHM6	0.0010117		M0QYE0	4.3e-06		I3L3E9	5.7e-07		H0YMU3	0.0074487
G3V5M2	2.322e-05		Q08ET0	0.00028514		K7EJ44	0.00015239		P08195	0.00066		Q8WUM4	12814		H0Y2L7	3.9869e-07		I6TRR8	7.2e-07		P15927	8.7809e-05		H0YHV5	1.8139e-07		M0QYR1	28936		I6L957	0.00062		H0YNA5	2.2467e-05
G5E9E9	0.0017827		Q08J23	1.3065e-07		K7EJB9	0.039353		P08238	0.00011		Q8WY81	19477		H0Y2W2	2.8295e-07		J3KN16	9.4e-05		P17655	1.0628e-07		H0YIV0	4.4284e-06		M0R0Y2	27671		I6LPK7	34573		H3BNP9	1.619e-05
G5EA09	4.7822e-07		Q09161	1.1225e-07		K7EJJ5	0.002822		P08473	3.9e-06		Q92820	85021		H0Y368	4.4755e-07		J3KNE0	7.5e-06		P17661	0.0042553		H0YIZ0	1.2041e-07		M0R1V7	12219		I6TRR8	7.5e-07		H3BNV2	1.5309e-07
G9K388	0.00062157		Q09666	2.1774e-05		K7EKX0	5.683e-06		P08648	8e-07		Q93008	4.6e-06		H0Y394	0.00022774		J3KNW4	11613		P19338	0.017757		H0YJ40	1.8454e-07		O00560	6.9e-06		J3KQL8	5.1e-07		H3BPK7	0.00095138
H0Y449	2.2147e-05		Q0D2Q6	6.7146e-05		K7EM90	0.00081861		P0C7P4	0.072		Q93020	1.7e-07		H0Y512	5.9414e-06		J3KPD9	5.7e-07		P19525	8.7734e-08		H0YJI8	5.6366e-06		O14660	22306		J3KRY1	7e-07		H3BS10	0.0011044
H0Y4R4	3.8492e-05		Q0IIN5	0.00019376		K7EMN2	0.00094966		P11217	3.4e-05		Q96A33	3e-06		H0Y548	4.5525e-05		J3KPM9	3.4e-05		P19823	0.0029326		H0YKK6	0.00051404		O14715	9.7e-06		J3QKT2	0.0002		H3BUK7	0.0023258
H0Y4Y4	4.0467e-07		Q0IJ56	0.022459		K7EN27	5.9986e-05		P11586	2.4e-06		Q96AG4	7131		H0Y687	3.8315e-08		J3KQL8	7.7e-06		P20700	9.0653e-08		H0YKS8	9.123e-05		O14942	0.00096		J3QLE9	8e-05		H3BVA8	0.019207
H0Y659	6.3593e-07		Q0VGD6	0.0021067		K7EPH2	5.1333e-05		P11717	8.6e-06		Q96C71	1.7e-07		H0Y6E7	0.00029192		J3KRI4	0.00035		P21399	0.0018777		H0YKT8	1.2782e-05		O14943	0.00093		J3QLI9	3.2e-07		H6WCP5	0.00024953
H0Y8W2	2.2625e-06		Q12797	5.2031e-08		K7EPW7	4.1185e-05		P12081	0.087		Q96QK1	40683		H0Y6T7	0.00016925		J3KS22	0.00055		P23246	0.00012495		H0YLU2	2.5804e-07		O14980	0.0009		J3QLR1	3.2e-06		H7BY16	3.8003e-06
H0Y983	0.00027002		Q12907	0.0001911		K7EQA9	2.8844e-08		P12111	4.1e-06		Q96RE1	51983		H0Y7G9	1.1254e-07		J3QKN0	0.00042		P26022	0.0042103		H0YLU7	0.0013573		O14992	0.0001		J3QSB7	3.8e-06		H7BZT7	0.0015157
H0Y9K1	2.4184e-05		Q13041	1.0162e-07		K7ESG8	0.00011977		P12268	0.0091		Q9BQ02	12356		H0Y875	0.0002815		J3QKT2	88414		P28331	0.00021409		H0YMA0	3.0316e-07		O15067	6e-06		J7FRP4	2e-07		H7C0A3	8.52e-08
H0Y9Q1	0.0090954		Q13228	7.6556e-08		K7X1S0	3.7404e-05		P12270	5e-07		Q9BSD0	12389		H0Y8C6	0.0081472		J3QL56	1.4e-06		P29144	0.023439		H0YMA1	4.074e-05		O43169	13959		J7M2B1	8.4e-07		H7C0R3	0.00028044
H0YAB0	1.541e-05		Q13263	1.1166e-07		K9MS24	7.1546e-05		P13473	0.0016		Q9BSE8	1.2e-06		H0Y8W2	0.00010707		J3QS36	0.00055		P30043	8.2677e-08		H0YMT1	1.4253e-07		O43681	1653		K7EJ44	42955		H7C0V9	2.2116e-07
H0YCJ8	8.0224e-07		Q13620	0.0015065		L8B4R0	0.00013124		P13489	1.7e-06		Q9BTI9	11631		H0Y983	0.00022397		J7FRP4	7e-07		P30048	5.2363e-06		H0YMU3	0.00027473		O43776	81717		K7EJE8	3.9e-07		H7C1D4	1.7719e-07
H0YCK3	0.00022716		Q13707	3.582e-08		M0QX72	3.4808e-05		P14314	1.9e-06		Q9BTY2	6.6e-06		H0Y9K7	0.00043503		J7M2B1	38123		P30084	6.33e-08		H0YNA5	8.3671e-05		O60282	0.00075		K7EKE6	3.9e-07		H7C2C5	3.6327e-05
H0YCR7	4.7822e-07		Q13727	6.6057e-06		M0QXB5	0.00011368		P14625	0.00097		Q9BUX5	7.5e-07		H0Y9X5	0.0077135		K7EJ44	8e-05		P30085	8.2677e-08		H3BNP9	0.00057064		O60361	94967		K7EKL8	0.00074		H7C367	0.0075688
H0YCU9	9.5497e-06		Q13813	1.471e-07		M0QXF7	8.528e-05		P15927	0.48		Q9BV28	4.3e-07		H0YAB0	4.2521e-05		K7EN27	5.6e-05		P30533	1.0628e-07		H3BNU3	0.00087371		O60518	0.00073		K7EL50	0.00038		H7C4G5	0.0010286
H0YDG0	0.0013057		Q14455	9.0653e-08		M0QYR1	0.00015265		P17812	0.27		Q9BW34	77765		H0YAB3	1.7185e-07		K7ENY6	13438		P30536	5.4223e-08		H3BNV2	1.5309e-07		O75083	0.0002		K7EL56	2.9e-05		H7C4H2	3.179e-07
H0YDN1	0.0012669		Q14666	6.33e-08		M0R1M6	0.00011578		P19338	0.94		Q9H3N1	5.1e-07		H0YB24	0.00032484		K9MS24	3.8e-07		P31930	0.0083152		H3BPK7	4.9181e-07		O75322	0.0001		K7ELR7	21141		H7C597	1.6739e-05
H0YE29	9.5497e-06		Q14730	0.0011843		M0R248	1.8612e-08		P19367	0.0003		Q9HB74	50904		H0YCU9	1.1381e-07		L8B4J3	0.00099		P32004	0.00011312		H3BRU6	0.034989		O75367	90682		K7EM90	0.00033		H7C5W9	0.00033833
H0YFA9	3.0702e-07		Q15046	7.0255e-08		M0R261	0.040151		P19525	0.027		Q9NZN4	72256		H0YD14	0.012304		M0QXB4	2.3e-07		P35580	0.00018281		H3BS10	1.3964e-07		O75475	5.9e-06		K7EME0	4.7e-07		H9KVC9	1.6073e-07
H0YIV0	0.03587		Q15404	1.5339e-07		O00264	4.59e-05		P21108	0.01		Q9NZS6	14239		H0YDD4	0.00056129		M0QXB5	9e-07		P35914	1.6941e-07		H3BU78	0.0027006		O75546	30697		K7EN27	3.2e-07		I1VE18	9.0648e-08
H0YIZ0	8.9681e-06		Q15463	5.0111e-08		O14967	8.5087e-07		P21266	0.064		Q9P1A0	5.6e-06		H0YDG0	8.276e-05		M0QXF7	4e-06		P37108	0.00022543		H3BUK7	1.1332e-05		O94855	0.00047		K7EPF6	0.00074		I3L398	0.0059945
H0YJZ8	0.00087408		Q15758	1.0628e-07		O14980	0.0006185		P21281	8e-06		Q9P2J5	1.2e-06		H0YE04	2.06e-06		M0QYR1	55365		P37802	3.9391e-08		H3BVA8	0.030557		O94874	6.9e-06		K7EPV9	8.5e-07		I3L3U9	5.1397e-05
H0YKT8	3.0692e-06		Q15904	1.0162e-07		O15260	2.9729e-08		P21399	8.7e-06		Q9UBQ7	15535		H0YER7	4.3506e-05		M0R0K9	12152		P38606	2.9006e-07		H6WCP5	1.4253e-07		O94925	81813		K7EQA9	5.1e-07		I3QNU8	0.00041334
H0YL69	1.0966e-06		Q16187	0.001244		O19677	0.0061275		P21589	0.04		Q9UHB9	7e-07		H0YFA9	0.00012369		M0R0Y2	5.1e-06		P40261	4.1173e-08		H7BY16	6.1775e-06		O95202	2.6e-06		K7ER27	8e-07		I6TRR8	7.1613e-06
H0YLU2	1.0208e-06		Q16222	7.6556e-08		O19744	1.7829e-08		P22087	0.067		Q9UIQ6	16077		H0YFD6	0.00010466		M0R1V7	0.00065		P41250	0.0042553		H7BZG0	5.702e-06		O95347	6.6e-06		K7ER39	6.1e-05		J3JZZ9	3.178e-07
H0YMU3	2.6029e-06		Q16576	0.0018777		O43615	2.7576e-08		P23497	0.052		Q9UKK9	5e-08		H0YFI1	2.5804e-07		M0R389	5.6e-07		P41252	0.0008217		H7BZT7	5.3507e-07		O95373	3.4e-05		K7ESA3	9.6e-06		J3KPD9	5.1448e-08
H3BLU7	0.013869		Q16881	0.00084392		O60701	3.7464e-08		P26038	0.056		Q9UN47	76105		H0YHM6	4.0576e-05		O00264	3.8e-07		P43307	0.006021		H7C0A3	7.2124e-06		O95654	4.1e-06		L0R849	0		J3KQE5	6.5164e-06
H3BLZ8	5.8586e-06		Q1XBU6	0.022459		O75322	0.0024836		P26583	0.00045		Q9UNM7	5.1e-07		H0YHV5	0.0010614		O14660	2e-06		P43487	7.319e-08		H7C0V9	2.2116e-07		O95831	8.5e-06		M0QYN0	6.2e-07		J3KRY1	7.9213e-08
H3BMS6	3.5422e-07		Q2NKY5	6.2344e-08		O75367	0.00014412		P27105	6.6e-06		Q9UNN8	3e-06		H0YIV0	0.00040928		O14715	7.5e-06		P46783	2.2803e-05		H7C1D4	1.7719e-07		O96011	58994		M0QZS6	9.6e-07		J3QKT2	0.0017963
H3BND4	2.0174e-07		Q2TA84	0.010247		O75396	6.0172e-06		P27694	2e-06		Q9Y3Z3	63647		H0YIZ0	0.00014233		O14942	2.3e-05		P46940	0.00024964		H7C2C5	2.7893e-05		P00492	17429		M0R1V7	31824		J3QKZ8	0.0054782
H3BRK3	6.7012e-06		Q2TTR7	1.6921e-07		O95479	0.00019692		P27824	0.00013		Q9Y6K5	7.1e-06		H0YJ40	1.8454e-07		O14943	1.3e-07		P49591	0.018665		H7C312	4.4755e-07		P00558	20797		O00264	0.00022		J3QLE5	1.9695e-07
H3BT58	0.0042553		Q2VPA0	9.3895e-08		O95782	0.00016817		P29966	0.0016		T2DQ69	4.2e-06		H0YJ66	2.9599e-07		O14980	9.1e-07		P49736	1.6038e-07		H7C367	0.00018163		P01116	3188		O00461	5.3e-06		J3QLL0	4.4325e-05
H3BTN5	2.3331e-07		Q2VPJ6	3.9659e-05		P00167	3.1134e-06		P30536	0.99		U3PXP0	6.8e-07		H0YJI8	0.00074705		O14992	8.9e-05		P49773	5.813e-08		H7C3V5	1.8829e-07		P02786	6.9e-06		O14942	0.00036		J3QQV2	0.024206
H6WCP5	0.00017914		Q2VYF8	2.6636e-07		P00492	2.2969e-08		P34932	0.047		V9GYG0	30943		H0YKK6	1.7072e-07		O15067	1.9e-06		P52292	0.0034909		H7C3V6	1.3721e-06		P04066	3.3e-06		O14967	9.3e-07		J3QSA3	0.012437
H7BZ20	0.00036707		Q32Q10	1.526e-07		P00734	2.2384e-08		P36776	5.2e-06		V9HVU7	57678		H0YKS8	0.00019322		O43169	1.4e-06		P53004	0.0020014		H7C4H2	3.179e-07		P04183	18838		O14983	0.0003		J3QTR3	0.0043949
H7BZT7	9.639e-08		Q3B7X1	0.0077765		P02794	7.0877e-05		P36871	0.036					H0YKT6	1.2531e-07		O43681	2e-07		P53007	5.3089e-08		H7C597	9.9007e-08		P04632	55235		O14992	26596		K4DI93	0.0024623
H7C0A3	4.3152e-05		Q3LIE9	0.0060401		P02808	8.0824e-05		P40261	0.11					H0YKT8	1.2047e-05		O43776	0.00071		P53597	0.0039152		H7C5W9	6.8716e-05		P05023	0.00075		O15031	5e-06		K4DIE0	3.82e-07
H7C1D4	0.0013498		Q3LIF4	2.6768e-07		P04181	0.00026285		P42765	0.47					H0YLU2	2.5804e-07		O60282	5.7e-07		P53618	0.0017483		H9KVC9	1.943e-07		P05161	11001		O43175	23103		K7EJ44	5.1703e-06
H7C3A1	0.017757		Q4G148	7.1675e-08		P06744	0.00031419		P43121	9.9e-06					H0YLU7	1.1746e-06		O60361	0.00059		P53634	5.0569e-08		I1VE18	9.0648e-08		P05186	8.1e-06		O60568	7.9e-05		K7EJB9	0.022512
H7C597	0.0042103		Q4LE79	1.5558e-07		P07954	0.0015049		P43304	0.088					H0YMA0	3.0316e-07		O60518	4.6e-06		P54136	1.1795e-07		I3L398	0.0076696		P05362	4.8e-06		O60701	7.7e-07		K7EJJ5	0.00018711
H9KVC9	1.9546e-05		Q4W4Y1	1.3763e-07		P08237	0.00012683		P46087	6.9e-06					H0YMA1	1.972e-05		O60701	31473		P54886	0.00032156		I3L3M7	0.0084433		P06756	10371		O75322	0.00027		K7EKG4	8.2341e-08
I1SRC5	0.00079027		Q504U8	1.6941e-07		P09382	1.4969e-05		P46379	2.6e-06					H0YMU3	9.4186e-05		O75083	11144		P54920	9.3895e-08		I3L3U9	0.00020355		P07686	41454		O75396	0.00024		K7EKX0	0.0010593
I3L398	2.7808e-06		Q53EM5	0.00039587		P10619	5.4838e-06		P48681	2.4e-06					H0YNA5	1.5364e-07		O75322	8.9e-05		P55084	0.0022068		I3QNU8	1.377e-07		P07954	15174		O75718	3.3e-07		K7ELJ7	3.2837e-07
I6L957	0.001071		Q53ES0	9.3515e-06		P11047	0.0011044		P49189	6e-06					H3BNP9	0.00013118		O75367	34221		P55263	1.3552e-07		I6L957	0.0053341		P07996	8.6e-06		O75746	0.00076		K7EMN2	0.0096556
I6L965	0.00047825		Q53F35	7.1398e-05		P11216	5.1667e-08		P49321	0.00081					H3BNU3	0.00024689		O75546	2e-06		P60468	4.4291e-08		I6TRR8	8.9177e-08		P08134	15648		O75944	9.2e-07		K7EN27	3.0878e-05
I6L9I5	0.00058555		Q53F55	0.0010696		P11279	5.9649e-05		P49327	4.8e-05					H3BNV2	1.5309e-07		O75828	39027		P61026	4.7704e-06		I6YID7	0.00056667		P08195	0.00035		O94874	4.7e-06		K7EP67	0.0024187
I6LPK7	0.0065662		Q53FB0	4.0544e-05		P12109	4.9439e-05		P49419	0.26					H3BPK7	1.6318e-05		O94855	7.7e-06		P62312	1.1795e-07		J3KPD9	5.1448e-08		P08238	0.00026		O94925	5.4e-07		K7EPH2	0.015523
I6TRR8	0.0018934		Q53FG3	0.0047545		P13674	0.0028379		P49588	5e-07					H3BRU6	0.00025745		O94874	7e-06		P62979	7.966e-05		J3KQE5	2.7333e-06		P08473	0.00092		O95138	8.4e-07		K7ERZ3	1.1632e-07
J3KN16	0.0062708		Q53FR4	1.0628e-07		P14174	8.555e-06		P49792	5.4e-06					H3BU78	0.00047158		O95202	9.6e-06		P63096	0.00090999		J3KQL8	2.0706e-07		P08648	0.00049		O95202	0.00025		K7ESG8	1.7781e-05
J3KNQ4	0.00060423		Q53GB3	0.00011487		P14625	0.00053977		P49915	4e-06					H3BUK7	0.001381		O95347	2.2e-06		P67809	0.032863		J3KRY1	8.7707e-06		P09382	11794		O95479	3.9e-07		K7X1S0	4.7671e-05
J3KNW4	0.0012112		Q53GE3	0.00026014		P17655	2.4997e-08		P52306	2.4e-06					H3BVA8	2.8354e-05		O95373	4.4e-05		P67812	5.6759e-08		J3KTM9	6.0489e-05		P09622	57265		O95571	6e-06		K9MS24	1.673e-07
J3KPD9	0.0042553		Q53GN4	1.2462e-07		P19338	0.00030094		P54136	0.075					H7BY16	6.3698e-05		O95571	2.3e-07		P68363	0.00087408		J3QKT2	0.0013812		P0C7P4	3711		O95782	3.5e-06		L8B4R0	0.0043949
J3KPM9	0.0010645		Q53GW1	0.0062708		P20020	3.7739e-08		P54652	0.0025					H7BZG0	0.00025637		O95654	5.6e-06		P78527	0.0017754		J3QLE5	1.9695e-07		P0CG48	77144		P00505	2.4e-05		M0QX72	0.024363
J3KQ32	3.2182e-05		Q53H03	0.024669		P22061	6.867e-05		P54727	0.007					H7BZT7	5.0445e-05		O95831	9.9e-07		P80723	6.8923e-08		J3QLL0	0.0012616		P10644	28613		P00558	0.00051		M0QXB5	1.5364e-07
J3KQL8	1.5859e-06		Q53HE7	2.5983e-07		P27144	0.00050819		P54886	3.9e-06					H7C0A3	7.9383e-06		O96011	56788		P84077	0.0042659		J3QQV2	2.0706e-07		P10809	26994		P02765	1.8e-06		M0QXF7	2.0338e-06
J3KRI4	0.0015081		Q53HK8	0.00038943		P27824	0.00016171		P55060	7.3e-05					H7C0R3	0.00011347		P00492	6.9e-07		Q02978	6.2344e-08		J3QSA3	0.00016068		P11217	6.8e-05		P04066	0.00088		M0QXI6	0.00017314
J3KS22	2.4796e-07		Q53T76	0.00059594		P29144	0.0010687		P55145	0.07					H7C1D4	0.0016977		P00568	2.2e-06		Q04837	5.3646e-08		J3QTR3	5.3552e-05		P11586	0.00028		P05161	5.1e-07		M0R055	4.8946e-06
J3QKN0	0.00064823		Q53Z07	1.2543e-07		P29590	3.5714e-08		P55263	0.08					H7C2C5	0.00029918		P01116	2.3e-07		Q05193	0.008186		J7M2B1	2.2376e-07		P11717	8.6e-06		P06493	6.3e-06		M0R1M6	0.013405
J3QKT2	0.0042553		Q53ZP9	1.3351e-07		P30048	6.5573e-06		P55265	7.3e-06					H7C312	4.4755e-07		P02786	7e-06		Q05BR2	0.031987		K4DI93	0.0003772		P12081	4.6e-06		P07954	5.6e-05		M0R261	0.0097253
J3QKZ8	0.00095729		Q569J8	0.0044374		P30084	9.7404e-05		P55809	2e-06					H7C367	0.00033064		P04183	6e-07		Q05CW6	0.0031318		K4DIE0	3.82e-07		P12111	4.1e-06		P08134	1.8e-06		O00264	0.00168
J3QL56	2.4796e-07		Q58FF2	1.5528e-05		P30536	1.4603e-08		P62312	0.078					H7C3G9	1.2077e-07		P04632	3.6e-05		Q05D43	0.032863		K7EJ44	2.8485e-05		P12270	5e-07		P09382	4.1e-06		O00560	1.3436e-07
J3QS36	2.4796e-07		Q58FF9	5.7357e-05		P31150	3.8778e-08		P62826	0.015					H7C3V5	0.00016899		P05023	1.9e-06		Q07955	9.4984e-08		K7EJJ5	2.9882e-06		P13473	0.00031		P09486	8.2e-07		O14880	0.0011496
J3QSE0	0.0011374		Q59E93	4.7259e-08		P31930	1.109e-06		P62917	0.83					H7C4G5	2.7592e-05		P05161	0.0005		Q08ET0	3.434e-05		K7EKG4	1.6264e-07		P13489	5.4e-06		P0DME0	8.9e-07		O14943	1.4084e-07
J7FRP4	0.030697		Q59EF6	1.526e-07		P36871	0.00021365		P80723	0.077					H7C4H2	3.179e-07		P05186	2e-06		Q08J23	0.012541		K7EM90	0.0043949		P14174	0.00079		P10155	0.00079		O14967	1.0932e-05
J7M2B1	9.6478e-06		Q59EI9	9.7523e-08		P37108	0.00013876		P82979	0.13					H7C597	0.00080183		P05362	1.4e-06		Q09161	0.00072006		K7EMN2	2.6519e-05		P14314	4e-06		P10768	0.00011		O14992	0.0042491
K7EJ44	1.3308e-05		Q59ES3	5.8944e-08		P38606	0.00019979		Q00341	7.6e-06					H7C5W9	0.030557		P06756	9.3e-07		Q0D2M2	6.0566e-08		K7EN27	9.2051e-05		P14550	8.5e-06		P11216	23661		O19744	9.8737e-08
K7EN27	2.806e-05		Q59ET3	0.00021366		P42765	0.00024077		Q01813	9e-07					H9KVC9	1.7116e-07		P07686	3.7e-07		Q0D2Q6	3.0965e-05		K7EP67	1.6639e-07		P14625	0.00083		P11279	0.00044		O43776	4.5635e-07
K7ENY6	0.0007452		Q59EV6	1.7958e-07		P43307	0.00011679		Q02218	7.9e-06					I1VE18	9.0648e-08		P07910	32164		Q0EFC9	4.0505e-08		K7EPH2	3.5577e-07		P14868	9.3e-06		P11717	3.9e-06		O43854	1.1625e-07
K7EQA9	1.7909e-05		Q59EZ3	1.3872e-07		P46783	0.00012072		Q03252	0.0079					I3L0N3	1.4084e-07		P07954	20755		Q0IIN5	0.001138		K7EPW7	5.2972e-06		P15927	9.7e-06		P12111	7.8e-06		O60518	0.028657
K7ER00	2.5903e-05		Q59F25	1.7557e-07		P46940	0.0018824		Q05BV1	5.4e-06					I3L398	0.0001878		P07996	7.7e-06		Q0VGA5	0.018665		K7EQA9	0.018761		P17661	5.4e-06		P14174	8.4e-07		O75367	0.00013914
K7ER96	8.3128e-05		Q59F44	9.093e-08		P48681	0.00011578		Q05BW3	6e-06					I3L3E9	0.00030888		P08134	7.6e-05		Q0VGD6	0.012139		K7ERZ3	1.138e-07		P18754	4.1e-06		P14324	5.6e-07		O75369	4.0071e-05
K7ERZ3	0.00024513		Q59F66	0.013869		P49748	8.748e-05		Q05BW9	0.0074					I3L3M7	0.00023196		P08195	18318		Q12797	5.8185e-08		K7ESA3	1.4601e-07		P19367	0.00072		P15924	5.6e-06		O75396	0.0019486
K9MS24	0.0012258		Q59FF0	9.3895e-08		P49773	5.9098e-05		Q05BX4	6.4e-06					I3L3U9	1.0574e-05		P08238	3e-05		Q12907	0.014329		K7ESG8	3.916e-06		P19525	49698		P15927	25917		O94874	4.9048e-07
L8B4J3	0.0055235		Q59FG2	8.5088e-08		P53007	2.6641e-08		Q05C82	0.0064					I3L445	2.8244e-07		P08473	3.4e-07		Q13011	1.0162e-07		K7X1S0	1.673e-07		P20020	0		P17655	2.1e-06		O95325	1.6264e-07
M0QXB4	0.0055235		Q59FI0	1.0628e-07		P53621	3.5185e-05		Q05CK9	0.088					I3QNU8	0.0003284		P08574	1.3e-07		Q13126	9.7523e-08		K9MS24	1.673e-07		P21108	35357		P17661	4e-05		O95479	0.016078
M0QXB5	0.00020469		Q59FQ4	6.739e-05		P54578	0.00015108		Q05CM9	0.0001					I6L957	7.2744e-05		P08648	5.4e-07		Q13228	7.6556e-08		L8B4R0	5.3552e-05		P21399	8.7e-06		P17844	6.5e-07		O95782	0.034588
M0QXF7	0.00015162		Q59FV6	0.0047209		P54886	0.00013044		Q05CU6	7e-05					I6TRR8	0.0018745		P09382	7e-05		Q13263	0.02638		M0QX72	0.0025356		P21589	24059		P18031	5e-08		O95831	0.0096686
M0QYR1	4.5724e-06		Q59G92	0.0030274		P55145	3.0062e-05		Q05D33	9.8e-06					I6YID7	0.00045973		P09417	5.1e-06		Q13505	1.0945e-07		M0QXB5	1.5364e-07		P21964	81813		P19338	0.00081		P00167	3.1559e-07
M0R0K9	3.0747e-08		Q59G96	1.0162e-07		P55290	6.6739e-05		Q05D48	3.5e-06					J3JZZ9	1.4084e-07		P09622	17301		Q13620	0.0013434		M0QXF7	5.4531e-08		P22102	27553		P19823	7.3e-05		P02792	1.2921e-07
M0R0U3	0.00026703		Q59GL1	0.024669		P56199	0.00084273		Q07954	7.8e-06					J3KPD9	5.1448e-08		P09669	0.00036		Q13707	7.1675e-08		M0QXI6	0.0012414		P22307	12495		P20645	0.00064		P02794	0.00031667
M0R0Y2	0.016984		Q59GS3	1.2382e-07		P61026	6.4891e-05		Q08431	8e-07					J3KQE5	1.1734e-05		P09914	58462		Q13813	1.471e-07		M0QYR1	2.489e-07		P23381	20991		P20700	7e-08		P02808	1.1e-05
M0R1V7	0.010666		Q59GU5	1.4978e-07		P61160	0.00015794		Q08945	9.5e-06					J3KQL8	0.0003907		P0C7P4	1.3e-07		Q13850	5.4223e-08		M0R055	0.0040693		P23497	5e-07		P21399	0.00089		P04066	0.0014389
M0R389	9.4896e-05		Q59H94	9.0653e-08		P61163	9.0517e-06		Q08ES8	0.063					J3KRY1	1.1448e-05		P0CG48	0.00099		Q14019	8.5088e-08		M0R1M6	3.1297e-05		P23526	14246		P23246	0.00092		P04181	0.022171
O00116	3.692e-07		Q5CAQ5	6.4228e-05		P61326	0.00012428		Q08ET0	0.042					J3KTM9	0.00137		P10515	8e-07		Q14108	0.0077765		M0R261	2.6978e-05		P23528	8208		P23381	4.3e-07		P04745	1.4557e-07
O00264	6.0465e-05		Q5FWG8	7.8229e-06		P61981	7.4216e-06		Q08J23	8.6e-06					J3QKT2	0.00010007		P10644	20442		Q14222	0.0034283		O00264	0.00097543		P23634	0		P26022	0.00097		P04746	1.4557e-07
O00560	4.7822e-07		Q5H928	0.0021306		P62312	3.098e-08		Q09161	3.7e-06					J3QKZ8	0.00059001		P10809	52155		Q14455	0.029434		O00560	8.6001e-05		P26583	23824		P28331	5.6e-06		P07814	0.00055841
O00764	2.1096e-05		Q5JQ13	1.1792e-05		P62314	2.842e-05		Q0D2M2	0.062					J3QLL0	1.0585e-05		P11217	3.2e-07		Q14666	6.33e-08		O14880	2.5804e-07		P27105	4.8e-06		P29144	0.00036		P07954	0.014049
O14660	4.7822e-07		Q5JRS2	8.646e-06		P62333	7.5661e-05		Q0EFC9	0.78					J3QSA3	0.0026469		P11586	2.7e-05		Q14696	6.4306e-08		O14967	0.00029678		P27694	84194		P30048	67996		P08237	4.9459e-05
O14942	0.0013259		Q5JTV8	0.0020014		P67812	4.0198e-05		Q0IIN5	6.9e-05					J3QTR3	0.0023054		P11717	7.7e-06		Q14730	0.012139		O14980	0.00048564		P27824	0.00054		P30084	1.8e-06		P0DME0	6.8435e-08
O14943	0.0009615		Q5JYX0	7.8396e-08		P78461	1.4781e-08		Q0QF12	0.08					J7M2B1	0.00017039		P12111	5.6e-06		Q15046	9.0653e-08		O14992	2.2617e-05		P28331	5e-06		P30613	5.2e-07		P10155	0.00015618
O14980	0.00076891		Q5M7Z5	0.012139		P80723	2.4997e-08		Q0VGD6	0.081					K4DI93	0.00028381		P12270	8.6e-06		Q15404	9.0592e-05		O15067	3.8675e-07		P28838	14787		P31150	6e-07		P10515	0.020478
O14992	0.0008145		Q5QNZ2	8.8698e-09		P84077	0.00014273		Q0ZGT2	8.6e-06					K4DIE0	0.00028587		P13473	2273		Q15691	8.5088e-08		O15260	3.2123e-07		P29966	8e-05		P31153	5.4e-07		P10619	1.9499e-07
O15067	0.00020259		Q5T0I0	4.3713e-08		Q00765	0.00016392		Q12797	8.9e-06					K7EJ44	0.00025312		P13489	1.3e-06		Q15717	9.0653e-08		O19677	0.00063045		P30043	20014		P31930	0.00041		P11216	3.9361e-07
O15376	8.3919e-05		Q5T0R3	4.2357e-06		Q02978	3.4501e-06		Q12931	3.6e-06					K7EJB9	0.00018381		P14174	8.8e-07		Q15758	0.0014144		O19744	1.8596e-07		P30048	12139		P32004	1.2e-06		P11279	0.00030143
O43175	0.00012495		Q5T205	6.5784e-08		Q04837	1.9621e-05		Q13011	5.6e-06					K7EJJ5	0.0016223		P14314	4.5e-07		Q15904	0.0098049		O43776	4.5635e-07		P30536	19917		P35580	15238		P12270	1.1572e-07
O43681	2.2371e-07		Q5T3N0	1.3954e-07		Q05CK9	2.6803e-05		Q13041	5.7e-06					K7EKX0	4.9181e-07		P14550	1e-07		Q16222	8.7734e-08		O60282	2.3788e-07		P31939	1071		P37108	67996		P13639	0.0035849
O43776	7.162e-05		Q5T624	0.010247		Q05CR5	2.7576e-08		Q13185	0.22					K7EL40	0.00022344		P14625	0.0009		Q16576	0.034651		O60518	2.2116e-07		P34932	12293		P37802	1.3e-06		P14174	2.2116e-07
O60282	0.00030409		Q5T626	0.024669		Q05D48	7.2727e-05		Q13217	0.058					K7EM90	0.00044773		P15927	7.5e-06		Q16836	0.0053926		O60701	3.8069e-05		P36776	0.00082		P40261	6.6e-07		P14625	0.012223
O60361	0.0017827		Q5TBR1	0.0073937		Q05DA4	0.00075194		Q13283	2.4e-06					K7EMN2	0.00031341		P17661	5e-07		Q16881	0.00025569		O75322	5.7994e-05		P43121	9.9e-06		P41219	7e-08		P17655	1.6264e-07
O60518	3.1727e-07		Q5TE63	2.5802e-05		Q05DJ8	3.7739e-08		Q13344	0.007					K7EN27	0.00041334		P18754	3.3e-06		Q1JQ76	3.5505e-05		O75369	1.2833e-06		P43304	0.00097		P41250	83172		P17812	2.352e-07
O60701	2.4621e-05		Q5VSR5	6.159e-07		Q07812	0.0010301		Q13724	3.4e-06					K7EP67	0.0014013		P19367	3.2e-05		Q2F831	8.0539e-06		O75396	0.00025526		P46060	5.4e-06		P41252	4e-07		P19338	4.5137e-06
O75322	0.0011744		Q5ZEY3	0.00023775		Q07955	0.0005658		Q13727	1.7e-07					K7EPH2	9.8858e-06		P21266	3.8e-07		Q2TNB3	0.00017914		O75475	2.9316e-07		P46087	6.9e-06		P43307	1183		P20020	5.3055e-07
O75367	0.0017827		Q5ZPJ1	7.1398e-05		Q08211	0.00013939		Q13850	0.99					K7EPW7	0.00040146		P21281	31811		Q2TTR7	1.1757e-05		O94925	9.2188e-08		P46379	2.6e-06		P43487	2.5e-06		P21399	0.0003278
O75390	0.00032429		Q6DC98	0.017757		Q08257	3.5714e-08		Q14008	2e-06					K7EQA9	0.00032045		P21399	5.7e-07		Q2TU78	9.3895e-08		O95479	1.5364e-07		P48681	2.4e-06		P46783	39939		P22061	9.0648e-08
O75475	0.0011726		Q6FHE4	7.5159e-05		Q08ET0	1.8013e-05		Q14247	0.0062					K7ERZ3	1.2214e-07		P21964	7.4e-07		Q2VPJ6	0.033545		O95782	0.0052492		P49189	2e-07		P49189	5e-08		P23368	0.00074057
O75828	2.341e-07		Q6FHK8	0.00065595		Q08J23	3.7739e-08		Q14315	4e-06					K7ESA3	0.00055387		P22307	2.5e-06		Q2VYF8	9.7523e-08		O95831	0.015914		P49321	5e-05		P49591	0.00043		P23381	0.00049968
O76003	1.4842e-07		Q6FHP5	0.024669		Q0D2M2	4.5955e-05		Q14329	0.47					K7ESG8	8.9481e-05		P23381	12618		Q32Q10	5.8285e-05		P00167	0.00038673		P49327	0.00061		P49736	6e-06		P23526	0.0041469
O94855	0.0029326		Q6FHZ0	0.0026609		Q0EFC9	0.0083977		Q14696	0.043					K7X1S0	3.6944e-05		P23528	3.3e-05		Q32Q12	4.4291e-08		P02792	2.108e-05		P49411	26435		P49748	0.00085		P26022	0.030557
O94874	0.0038615		Q6I9V5	9.7523e-08		Q0QER2	0.00052697		Q14764	2.1e-06					K9MS24	0.003003		P26583	2e-08		Q3B792	8.7734e-08		P02794	1.7539e-07		P49588	0.00064		P52292	10258		P27144	3.6526e-06
O94925	0.0024727		Q6IAW5	0.024669		Q0QF12	4.9951e-05		Q14917	2.4e-06					L8B4R0	0.0023054		P27694	1e-07		Q3B7W7	5.8185e-08		P02808	6.5317e-05		P49591	30208		P53004	3.9e-07		P27348	0.00074483
O95347	0.00072513		Q6IBP2	8.7734e-08		Q0VGD6	0.0042594		Q14974	0.09					M0QX72	0.00016435		P27824	0.00083		Q3BDU5	6.1434e-08		P04181	0.00090791		P49792	5.4e-06		P53597	4.4e-07		P27824	0.00148
O95373	4.4317e-05		Q6IBS5	0.0026807		Q10471	7.9235e-06		Q15020	2.8e-06					M0QXB5	1.5364e-07		P28331	7e-07		Q3LIF4	2.6768e-07		P05161	1.9499e-07		P49915	13194		P53618	0.00085		P28331	1.5073e-07
O95571	0.021318		Q6LBS1	2.5983e-07		Q10713	2.9918e-08		Q15029	1.7e-06					M0QXF7	7.7939e-05		P28838	19003		Q3MIH3	7.966e-05		P06744	0.00043216		P50452	2e-07		P53634	3.9e-07		P29966	1.7728e-07
O95654	0.00014705		Q6MZI6	2.2381e-05		Q12931	3.4904e-05		Q15042	5e-06					M0QXI6	0.00025361		P29966	35306		Q496I0	7.4813e-08		P07814	1.6139e-07		P53004	1071		P54136	1.8e-06		P30048	1.0143e-05
O95831	1.7344e-07		Q6NTA2	0.0046751		Q13041	0.00021044		Q15075	8.6e-06					M0QYR1	0.023392		P30043	9.7e-05		Q49A90	7.162e-05		P07954	6.9856e-05		P54136	31987		P54886	7.7e-07		P30084	9.5497e-08
O96011	4.9567e-05		Q6NVC0	7.6894e-05		Q13126	3.5583e-08		Q15149	4.8e-06					M0R055	8.952e-05		P30048	3.8e-07		Q49AG2	5.8944e-08		P08237	6.7883e-05		P54819	94373		P54920	8e-07		P30536	2.352e-07
P00492	0.00020918		Q6NXF2	5.795e-06		Q13727	0.011638		Q15417	0.016					M0R1M6	0.0059521		P30084	2e-07		Q4LE79	1.5558e-07		P09622	0.0019486		P54886	5.5e-05		P55084	0.00069		P31150	0.0066463
P00505	0.039533		Q6PIN5	0.01653		Q13850	1.4603e-08		Q15436	7.3e-06					M0R248	1.1216e-07		P30085	8.2e-07		Q4W4Y1	0.00037459		P0DME0	9.2322e-08		P55060	0.0004		P55290	27315		P31153	0.0023687
P00558	7.3916e-06		Q6PIX2	1.1617e-05		Q14019	3.5714e-08		Q15459	0.0015					M0R261	0.00031516		P30536	17354		Q504U8	1.6941e-07		P10515	0.022642		P55145	6e-06		P61026	0.00079		P31930	1.2758e-06
P00568	0.00050354		Q6PJ72	1.0628e-07		Q14108	0.00016044		Q15582	3.3e-06					O00264	9.9192e-06		P36776	1.5e-06		Q53ET8	6.5366e-08		P10619	1.9499e-07		P55263	28608		P63096	11316		P35659	1.138e-07
P01116	0.0018273		Q6PJM5	0.024669		Q14112	1.3317e-05		Q15631	0					O00560	1.3436e-07		P40261	4e-06		Q53F35	9.2827e-08		P11047	2.1001e-05		P55265	0.00072		P67809	5e-08		P36551	2.2116e-07
P02786	0.0020014		Q6PJT4	0.00066406		Q14204	4.0201e-08		Q15645	5.4e-06					O14880	2.5804e-07		P42765	32575		Q53F55	6.7429e-08		P11216	7.1234e-07		P55809	1.2e-06		P67812	7.1e-06		P36871	0.014604
P04066	4.2591e-07		Q6PJY1	0.0020619		Q14329	5.9532e-05		Q15657	0.012					O14943	1.0443e-07		P43121	9e-08		Q53FA5	4.4291e-08		P11279	0.00052805		P61009	21585		P68363	50577		P37108	0.00028998
P04183	0.00025441		Q6PK56	9.5279e-05		Q14400	0.00041255		Q15691	2.2e-05					O14967	5.89e-06		P46060	9.5e-06		Q53FB0	2.8998e-05		P12109	5.127e-06		P61026	16576		P78527	0.00028		P40261	8.4325e-06
P04632	0.00045084		Q6PKD2	0.0042103		Q14455	2.2384e-08		Q15758	2.6e-06					O14980	0.00032942		P46087	7e-06		Q53FN7	0.0089576		P12270	1.1572e-07		P61163	7e-06		P84077	7e-05		P42765	1.2461e-05
P05161	0.0012655		Q6S8J3	0.0090392		Q14473	2.6641e-08		Q15942	0.21					O14992	0.0013199		P46379	9.6e-06		Q53FR4	0.015288		P13639	0.0001138		P61326	23079		Q02978	1.8e-06		P43307	9.6208e-05
P05186	4.8056e-07		Q6TXQ4	4.0723e-08		Q14666	1.956e-08		Q16222	0.89					O15067	0.0015985		P46781	0.00053		Q53G34	4.11e-06		P13674	0.0033896		P62312	5.4e-06		Q03252	8.9e-07		P43487	1.673e-07
P05362	0.0058962		Q6UVK1	5.1041e-08		Q14917	0.00011819		Q16555	0.006					O15451	2.8244e-07		P47756	0.00014		Q53G81	8.0468e-08		P14174	2.2116e-07		P62979	77144		Q05193	25119		P46783	1.2392e-05
P05455	4.5648e-05		Q6W6M8	5.5443e-08		Q14XT3	4.319e-05		Q16643	3.3e-06					O19677	0.00046301		P48681	2e-07		Q53GA0	7.8435e-08		P14625	9.9502e-06		P82979	14297		Q05BR2	4.8e-07		P46940	0.001365
P06733	0.0023318		Q6ZNL4	8.5088e-08		Q15156	3.5714e-08		Q16706	5e-07					O43592	1.8596e-07		P49189	1.3e-06		Q53GB3	1.9555e-05		P17655	1.4557e-07		Q00341	5e-05		Q05CK9	17827		P48681	1.1873e-07
P06756	0.002819		Q6ZVI6	0.0016152		Q15459	0.0002822		Q27J81	7.8e-06					O43615	1.5073e-07		P49321	4.6e-06		Q53GB9	7.6556e-08		P17812	2.2001e-07		Q01813	0.00098		Q05CU6	7e-08		P49189	0.014443
P07686	0.0091216		Q71V33	8.0872e-08		Q15463	0.00010745		Q2KQ72	6.6e-06					O43776	1.9254e-05		P49327	5e-07		Q53GL5	0.0077765		P19338	8.244e-06		Q02218	0.00082		Q05CW6	10527		P49327	1.4796e-05
P07910	5.76e-07		Q7KYK3	0.0027671		Q15582	1.9604e-08		Q2TB90	9.9e-06					O60282	0.00015102		P49411	1.3e-05		Q53GN6	0.018819		P21399	1.3328e-07		Q03135	93981		Q05D43	5e-08		P49773	6.0336e-05
P08134	0.00015648		Q7L4M3	0.021051		Q15758	0.00010253		Q2TTR7	8.6e-06					O60518	0.00026106		P49419	33509		Q53GW1	0.0098049		P22061	9.0648e-08		Q03252	1839		Q05D48	0.0008		P50502	1.0244e-07
P08195	0.0012822		Q7L553	3.7006e-08		Q16222	2.5785e-08		Q2VIN3	0.06					O60610	2.2001e-07		P49588	3.8e-07		Q53GY0	0.01144		P23368	1.8454e-07		Q05BV1	5.4e-06		Q05DA4	0.00061		P50570	0.0078251
P08238	0.0015415		Q7RTM4	0.0042553		Q16555	3.5583e-08		Q2VIR3	4.3e-06					O60701	0.00034976		P49792	6.3e-06		Q53H03	0.00067996		P23381	0.010991		Q05BW3	6e-06		Q08ET0	78039		P53007	2.7499e-07
P08473	0.0026276		Q7Z3Z9	1.1225e-07		Q16836	8.3598e-05		Q2YD88	0.0015					O75322	0.00017044		P49915	8e-05		Q53HA4	0.018665		P26639	0.00010275		Q05BW9	30888		Q08J23	3.1e-06		P53634	7.3767e-08
P08574	0.0023285		Q7Z4Y3	1.1795e-07		Q1JQ76	3.189e-05		Q32P42	1.1e-06					O75367	9.0793e-05		P50502	19003		Q53HB7	7.6556e-08		P27144	1.0938e-07		Q05BX4	0.00067		Q09161	12495		P54578	1.6837e-06
P08648	0.00027937		Q7Z675	1.6741e-07		Q2L6G3	2.9279e-08		Q32Q12	0.78					O75369	0.019472		P53004	13628		Q53HE7	9.7523e-08		P27348	6.4854e-05		Q05C82	0.00049		Q09666	3.8e-05		P54886	7.224e-05
P09382	0.001387		Q86SW4	0.0058962		Q2TTR7	0.00025099		Q32Q67	0.046					O75396	0.00018599		P53007	5.4e-07		Q53HH2	3.1565e-05		P27824	0.00034918		Q05CM9	5.9e-06		Q0D2M2	1.8e-06		P55145	1.5364e-07
P09417	0.0007067		Q86UY0	0.018503		Q2TUW9	3.3532e-05		Q3B792	0.0003					O76003	1.8596e-07		P54652	13713		Q53HJ8	8.5088e-08		P29144	0.01283		Q05D08	12139		Q0D2Q6	32898		P55290	0.0036044
P09914	0.001071		Q86VG2	1.0844e-05		Q2VIN3	0.0014781		Q3B7A7	7.8e-06					O94925	0.0014389		P54709	12408		Q53HK8	9.0653e-08		P30048	1.7664e-05		Q05D33	9.8e-06		Q0EFC9	2e-07		P56199	0.0010626
P0C7P4	0.01316		Q86XP3	1.4214e-07		Q2VIP3	0.0032253		Q3B7B9	9.8e-06					O95202	2.0703e-07		P54819	7e-05		Q53HW7	0.011326		P30084	9.5497e-08		Q05D48	3.4e-05		Q0IIN5	0.00039		P58107	1.2197e-07
P0CG48	0.0055235		Q86XU5	0.00034165		Q2VPJ6	0.0024836		Q3KNV1	6.5e-06					O95479	0.00098375		P54886	3.4e-07		Q53T76	0.0018813		P31150	1.9163e-07		Q07954	7.8e-06		Q0IJ56	6.5e-07		P61026	2.6776e-05
P10515	2.7334e-07		Q8IUB0	0.00051983		Q32Q12	0.0089707		Q3KQZ8	2e-07					O95654	2.352e-07		P55060	6.4e-05		Q53Z07	5.6088e-08		P31930	2.5064e-06		Q08431	7.1e-06		Q0QER2	3.9e-07		P61160	0.00011806
P10809	0.0072512		Q8N0Y7	6.4306e-08		Q32Q20	1.847e-08		Q3LIE9	0.21					O95782	0.0093888		P55145	1.9e-06		Q53ZP9	0.0015108		P35659	9.8915e-08		Q08945	4.9e-05		Q0VGA5	0.00043		P61326	1.8454e-07
P11217	2.4388e-05		Q8N1C8	0.01144		Q3B792	2.8844e-08		Q3MHV2	0.94					O95831	0.00011237		P55265	2.5e-06		Q569J8	0.0074395		P36551	2.2116e-07		Q08ES8	13531		Q0VGD6	78349		P61956	2.591e-06
P11586	0.0013636		Q8NBH6	6.33e-08		Q3B7A3	8.2287e-09		Q3MI39	0.026					P00167	3.1559e-07		P55809	3.7e-06		Q58FF9	0.00014767		P36871	0.012801		Q08J23	12495		Q10471	2e-08		P61981	2.9415e-05
P12081	0.00049403		Q8NBS9	0.018503		Q3B7W7	0.00012428		Q3ZCQ8	5e-06					P00558	0.00010112		P60468	0.00027		Q59EF6	1.0628e-07		P37108	1.1025e-07		Q09161	3.7e-06		Q10713	5.5e-05		P62314	0.0072469
P12111	0.0018777		Q8NBX0	6.8923e-08		Q3LIE9	1.4253e-05		Q49A78	1.6e-06					P00734	8.8201e-08		P61009	6.8e-05		Q59EI9	0.0013153		P40261	1.7004e-06		Q0D2M2	20014		Q12771	2e-06		P62333	0.015136
P12268	3.7781e-05		Q8NF19	1.0162e-07		Q3MHV2	0.014119		Q49AD3	7e-07					P02792	1.2921e-07		P61026	7.1e-06		Q59EL5	3.2335e-08		P41250	0.015158		Q0D2M6	5e-06		Q12797	9.3e-06		P67812	2.2467e-05
P12270	0.00093351		Q8NF91	0.0042553		Q3MI39	1.0871e-05		Q49AG2	8.1e-06					P02794	9.4204e-06		P61081	12061		Q59EM9	7.966e-05		P42765	8.9093e-08		Q0EFC9	52765		Q12907	5.2e-05		P67936	1.8166e-05
P13473	1.593e-05		Q8TAS6	1.0162e-07		Q3MIH3	0.00013124		Q49AI3	8.6e-06					P02808	1.042e-07		P61163	7.4e-05		Q59ES3	0.0014037		P43307	0.00084391		Q0IIN5	0.00074		Q13011	8.7e-06		P68363	0.0007627
P13489	4.7822e-07		Q8TES4	2.4103e-05		Q3SYK8	4.8982e-06		Q4LE36	3.9e-06					P04066	0.00063671		P61326	7.5e-07		Q59ET3	0.0069044		P43487	1.673e-07		Q0QF12	90954		Q13041	2e-07		P69849	3.1445e-07
P14174	0.00036439		Q8WUI6	0.00010896		Q49A90	6.1842e-05		Q4LE60	2.4e-06					P04181	0.00011662		P62312	1.6e-06		Q59EV6	4.4311e-05		P46783	3.1574e-05		Q0VGA5	30208		Q13126	3.8e-06		P78539	3.3588e-07
P14314	0.042283		Q8WUM4	5.7542e-08		Q4G148	1.3947e-08		Q4QQP8	2.4e-06					P05161	0.0001899		P62826	6e-05		Q59EZ3	1.3872e-07		P46940	2.0092e-05		Q0ZGT2	8.6e-06		Q13148	7e-08		P80723	1.3248e-07
P14625	0.02184		Q8WVM8	0.0062708		Q4LE36	0.00076348		Q4TT76	7.8e-06					P06744	0.0001754		P62917	1e-05		Q59F25	1.7557e-07		P48681	6.1207e-06		Q10713	6.6e-06		Q13228	6.6e-07		P84077	0.0019606
P15121	3.3445e-06		Q8WY81	0.00017428		Q502X2	3.7404e-05		Q4W4Y1	1.6e-06					P07814	0.0091293		P62979	0.00099		Q59F44	7.8275e-06		P49327	1.3328e-07		Q12797	86007		Q13263	1.2e-06		Q00325	9.5512e-07
P15927	0.0045796		Q92799	0.017757		Q53ET2	3.5583e-08		Q504U8	7.8e-06					P07954	0.00019223		P80723	12688		Q59FA2	9.7523e-08		P49773	1.6456e-07		Q12931	9.7e-05		Q13492	42103		Q00765	1.9655e-07
P17655	0.00023438		Q93008	1.4581e-07		Q53ET8	2.6641e-08		Q53EM5	0.0068					P08237	2.4662e-05		P82979	0.00047		Q59FF0	0.0036585		P50502	1.0244e-07		Q13011	12713		Q13620	12837		Q02978	0.00040146
P17812	2.7749e-05		Q93020	7.4813e-08		Q53F55	6.7253e-05		Q53EY8	0.13					P09622	0.00029678		Q00341	3e-08		Q59FG2	0.0038615		P50570	0.0056999		Q13041	0.00031		Q13727	2e-05		Q04837	4.1494e-05
P18754	5.11e-07		Q969X5	0.00057566		Q53FA5	4.1972e-05		Q53FG3	0.0031					P10155	2.7197e-05		Q01813	5.2e-07		Q59FV6	0.00027219		P53007	1.7728e-07		Q13257	6.9e-06		Q13813	4.7e-06		Q05D06	1.3328e-07
P19367	0.0038059		Q96A33	0.0036797		Q53FB0	0.0013787		Q53FG5	8.6e-06					P10515	0.00040928		Q02218	1.5e-07		Q59G75	1.4978e-07		P53621	0.0001025		Q13283	8.6e-06		Q14108	8e-05		Q05D43	0.00076512
P19525	0.0018777		Q96AG4	1.1795e-07		Q53FG3	6.8222e-05		Q53FN7	0.078					P10619	0.0003829		Q02978	5.4e-07		Q59G92	0.0025917		P53634	7.3767e-08		Q13724	4.8e-05		Q14222	14929		Q05D48	0.00021597
P21108	5.0742e-06		Q96AR9	1.2115e-05		Q53FR4	0.00093791		Q53FU3	0.034					P11047	0.0008862		Q03135	14348		Q59G96	0.0033755		P54578	2.2249e-07		Q13727	2.9e-05		Q14400	6.5e-05		Q05D76	0.00016703
P21266	0.013423		Q96B85	0.0066884		Q53FS6	8.184e-05		Q53FV3	0.082					P11216	1.0605e-07		Q05682	5e-07		Q59GS3	7.8435e-08		P54886	1.1873e-07		Q13850	19917		Q14455	7e-08		Q05DA4	0.0095925
P21281	1.8004e-07		Q96BA7	0.00012816		Q53FU3	1.9177e-08		Q53FW2	0.21					P11279	0.00041987		Q05BV1	1.6e-06		Q59GU5	1.5117e-07		P55060	6.6181e-05		Q13868	5e-07		Q14666	3.3e-07		Q05DJ8	9.089e-08
P21399	9.6593e-05		Q96BG6	0.0002605		Q53G69	2.7576e-08		Q53G69	6.6e-06					P12109	0.00032032		Q05BW3	1.9e-06		Q59H15	6.1434e-08		P55145	1.5364e-07		Q13907	38089		Q14730	10684		Q07666	1.2197e-07
P21589	0.0042553		Q96C71	7.4813e-08		Q53G72	0.00017579		Q53G81	0.0004					P13639	0.0026019		Q05BX4	4.9e-07		Q59H94	9.0653e-08		P55290	0.024183		Q14008	2e-06		Q15165	4.3e-07		Q07812	0.0027717
P22087	0.014033		Q96G03	0.01839		Q53GE3	4.9758e-06		Q53GB9	0.0061					P13674	0.00011071		Q05CU6	23599		Q59HE2	0.0020561		P56199	5.6502e-05		Q14165	5e-07		Q15404	30208		Q07955	3.6139e-06
P22102	0.00017224		Q96GX3	2.1568e-07		Q53GK6	0.00015371		Q53GG0	0.00079					P13797	9.5446e-05		Q05D33	3.7e-06		Q5EB52	1.4333e-07		P58107	1.2197e-07		Q14247	77765		Q15435	20661		Q08211	0.0009607
P23381	0.00056903		Q96IF9	0.00014767		Q53GL6	1.4253e-05		Q53GS1	0.0007					P14174	2.2116e-07		Q05D48	1.4e-07		Q5FWG8	0.00119		P61026	7.7782e-06		Q14315	4e-05		Q15463	0.00087		Q08257	1.3248e-07
P23497	0.00054354		Q96IS6	0.014095		Q53GQ8	8.3598e-05		Q53GX4	0.47					P14550	1.365e-07		Q05DA4	31641		Q5H928	9.9687e-06		P61163	1.4459e-05		Q14696	77765		Q15717	5.3e-06		Q08ET0	4.0327e-05
P23526	8.8056e-05		Q96QK1	1.0162e-07		Q53GR7	1.0118e-05		Q53GX7	4.7e-05					P14625	0.00067232		Q07954	2e-06		Q5I6Y5	6.1434e-08		P61326	1.8454e-07		Q14764	16179		Q15758	6e-07		Q08J23	2.5322e-07
P23528	0.00026661		Q96RE1	0.00051983		Q53GW3	0.00099389		Q53GY0	0.024					P14868	1.8596e-07		Q08431	5.3e-07		Q5J908	9.0653e-08		P61956	7.4627e-08		Q14917	0.0005		Q15904	2e-07		Q0D2M2	2.9415e-05
P26038	2.0255e-05		Q96TA1	0.0010038		Q53HB3	1.6691e-05		Q53GZ5	5.9e-06					P17655	1.365e-07		Q08945	8.8e-07		Q5JQ13	0.0030274		P61981	1.6456e-05		Q15020	2.8e-06		Q16187	2.7e-07		Q0EFC9	2.0123e-05
P26583	8.1646e-06		Q99523	8.2677e-08		Q53HB7	3.7404e-05		Q53HJ4	8.9e-06					P19338	0.00010826		Q08ES8	4e-05		Q5JRS2	0.00033222		P62314	3.1991e-06		Q15029	13129		Q16555	0.0004		Q0IJ56	1.0244e-07
P27105	3.5422e-07		Q99529	6.454e-05		Q53HH2	2.8747e-05		Q53HJ8	8.1e-06					P21399	0.00059001		Q08ET0	0.00077		Q5JTV8	0.026778		P62333	0.00046886		Q15042	5e-06		Q16576	0.00025		Q0QF12	0.00042638
P27694	0.0022999		Q99685	2.6636e-07		Q53HJ8	1.7829e-08		Q53HP2	0.0076					P22061	9.0648e-08		Q08J23	7.7e-06		Q5JWS0	0.010247		P67812	8.3671e-05		Q15046	0.00042		Q16836	23405		Q0VGA5	0.0017963
P27824	0.0050454		Q99988	0.00023559		Q53HQ0	2.8782e-08		Q53HS0	0.52					P22087	4.0048e-05		Q09161	9e-07		Q5JYX0	1.8696e-05		P67936	1.6608e-07		Q15075	8.6e-06		Q16881	1.2e-06		Q0VGD6	0.013871
P28331	0.0077765		Q9BR63	8.7734e-08		Q53HS0	0.00014905		Q53HU8	0.052					P22102	2.0703e-07		Q0D2M2	6.4e-05		Q5M7Z5	0.032863		P68363	0.00037867		Q15136	19055		Q1XBU6	6.5e-07		Q10471	2.9946e-05
P28838	0.0008145		Q9BST8	1.2676e-05		Q53XL8	0.00012544		Q53HW7	0.0038					P23368	0.00010782		Q0D2M6	9.5e-06		Q5QNZ2	0.015458		P84077	5.2456e-06		Q15149	4.8e-06		Q2F831	7e-05		Q10713	1.8136e-07
P29966	0.00010684		Q9BSW5	1.3983e-07		Q53Z07	2.0346e-05		Q53XL8	0.1					P23381	0.00011436		Q0EFC9	9.4e-05		Q5ST81	0.021815		Q00325	8.488e-05		Q15404	57422		Q2NKY5	2.3e-07		Q12771	0.0073125
P30043	5.6766e-05		Q9BUX5	0.0052765		Q569J8	0.00061241		Q53Y51	0.56					P23526	0.00067232		Q0IIN5	7.9e-05		Q5T0I0	0.014787		Q00765	1.9655e-07		Q15436	0.00084		Q2TA84	0.00017		Q13126	1.7539e-07
P30048	0.03872		Q9BV28	9.7523e-08		Q58F09	0.00019587		Q53ZP9	8.6e-06					P26022	0.00045333		Q0IJ56	19003		Q5T0R3	0.0068484		Q02978	0.00021642		Q15459	28516		Q2TNB3	17827		Q13148	1.4084e-07
P30085	0.00074406		Q9BVS9	7.6556e-08		Q58F26	0.00096936		Q549M8	2.8e-06					P26639	4.1206e-05		Q0QF12	15936		Q5T205	0.0067337		Q04837	1.0542e-07		Q15631	90401		Q2TTR7	1333		Q13263	0.00019457
P30536	0.0042103		Q9BW34	0.0052765		Q58FF2	0.00020091		Q567R9	0.13					P27144	1.6616e-06		Q0VGD6	11766		Q5T624	0.001071		Q05BX4	0.00071356		Q15645	9.9e-06		Q2VPA0	3.9e-07		Q13404	1.3328e-07
P31150	1.9278e-07		Q9BWD1	0.00018269		Q59E93	0.00026285		Q567U8	6.9e-06					P27348	1.9775e-05		Q0ZGT2	7.7e-06		Q5T626	0.00067996		Q05CK9	0.0041065		Q15657	43868		Q2VPJ6	5e-05		Q13492	0.0012381
P31153	0.023274		Q9BXP5	1.3872e-07		Q59EF6	2.4997e-08		Q569J8	0.09					P27824	0.00024317		Q10713	5.4e-06		Q5T7C4	7.6556e-08		Q05CM9	2.9316e-07		Q15691	0.00047		Q2VYF8	8.5e-06		Q13707	5.1448e-08
P31939	2.889e-07		Q9C0E8	8.2677e-08		Q59EG0	3.5714e-08		Q58F05	9.8e-06					P28331	2.5322e-07		Q12771	24795		Q5TE63	1.0232e-07		Q05D06	1.3328e-07		Q15942	12465		Q32Q10	24101		Q13850	2.352e-07
P34932	0.0036033		Q9HAP0	0.00031906		Q59EI9	1.2902e-05		Q58F09	8e-07					P29144	6.1898e-05		Q12797	3.2e-06		Q5U0B3	5.5443e-08		Q05D08	1.3328e-07		Q16222	59182		Q32Q12	3.9e-07		Q13868	2.9761e-07
P36776	5.6516e-05		Q9HAP1	4.7808e-05		Q59EL5	1.6148e-05		Q58FF2	0.00014					P29966	2.7499e-07		Q12931	1.3e-05		Q5U5J2	9.0653e-08		Q05D43	2.5726e-05		Q16643	0.00042		Q3B792	2e-06		Q14108	4.2823e-05
P36871	1.0887e-07		Q9HBB2	8.0468e-08		Q59ES3	0.00010253		Q58FF3	0.00012					P30048	2.102e-05		Q12965	8.2e-07		Q5UGI3	7.966e-05		Q05D48	2.8547e-05		Q16706	5e-07		Q3B7W7	2.5e-06		Q14204	5.5417e-07
P36873	7.7644e-07		Q9NSD9	8.7734e-08		Q59ET3	0.0011764		Q58FF9	0.00012					P30084	8.1782e-06		Q13011	1.1e-07		Q5VSR5	2.2141e-07		Q05D76	2.1376e-07		Q16881	22494		Q3B7X1	7.7e-07		Q14315	0.00051301
P40261	0.00036439		Q9NYU2	5.6759e-08		Q59EV6	5.4838e-06		Q58FG1	0.00042					P31150	0.0042971		Q13041	1.8e-07		Q5ZPJ1	7.5741e-08		Q05DA4	0.002152		Q1AHP8	4.8e-06		Q3BDU5	1.4e-07		Q14329	1.6827e-07
P40925	1.2046e-06		Q9NZ08	4.9604e-09		Q59EY4	8.2287e-09		Q59E89	0.82					P31930	5.5888e-06		Q13092	2.5e-07		Q6DC98	9.0653e-08		Q05DJ8	1.2208e-07		Q27J81	65874		Q3LIE9	1.2e-06		Q14400	0.00014947
P40926	0.00030409		Q9NZN4	0.0072256		Q59F66	0.00035444		Q59E93	3.4e-05					P36551	6.8216e-05		Q13185	4e-07		Q6FGD7	3.0588e-08		Q07666	1.2197e-07		Q28617	63647		Q3LIF4	6.8e-06		Q14455	2.352e-07
P41250	0.0017307		Q9NZS6	1.8128e-05		Q59F68	3.9939e-05		Q59EC0	7.3e-06					P36871	4.0048e-05		Q13217	12135		Q6FGG2	5.5443e-08		Q07812	1.7219e-07		Q2KQ72	6.6e-06		Q3MHV2	0.00097		Q14473	3.967e-07
P43121	0.0063647		Q9P0I2	0.00017871		Q59FC6	0.0010544		Q59EF6	0.023					P37108	1.1025e-07		Q13283	9.1e-07		Q6FGS1	7.8435e-08		Q07955	2.9932e-05		Q2TB90	9.9e-06		Q49A90	12139		Q14666	1.1111e-07
P43304	0.00042744		Q9P1A0	0.00034097		Q59FG2	3.5241e-05		Q59EI4	0.28					P38606	0.0001429		Q13344	14221		Q6FGU2	6.33e-08		Q08211	2.728e-05		Q2TNB3	30697		Q4G148	1.7e-07		Q14730	0.004311
P46087	0.0020014		Q9P1N1	0.0045796		Q59FH0	4.1972e-05		Q59EZ3	8.6e-06					P40261	2.1424e-05		Q13492	362		Q6FGX3	6.5366e-08		Q09161	0.00034661		Q2TTR7	8.6e-06		Q4LE79	5.6e-06		Q14917	0.00011327
P46379	4.2591e-07		Q9P2B2	1.2543e-07		Q59G26	0.00034933		Q59F03	9e-07					P41250	0.00014136		Q13724	2.4e-05		Q6FHJ9	5.0569e-08		Q0D2M2	4.3987e-06		Q2VIN3	2712		Q4W4Y1	24757		Q14XT3	0.00079798
P46781	0.0018526		Q9P2E9	1.3351e-07		Q59GL1	2.6803e-05		Q59F25	5e-06					P42765	0.0038557		Q13727	8.2e-05		Q6FHK8	2.1774e-05		Q0EFC9	8.0233e-06		Q2VIR3	1144		Q504U8	6.9e-06		Q15006	2.7421e-07
P47756	0.0014592		Q9UBG0	0.00058121		Q59GM9	4.7226e-08		Q59FC6	0.00097					P43307	4.2686e-06		Q13850	17354		Q6FHM4	6.33e-08		Q0IJ56	1.0244e-07		Q2YD88	4787		Q53EM5	15267		Q15075	3.5388e-05
P47985	0.0064145		Q9UBQ7	0.012139		Q59GW6	0.00064223		Q59FD8	2e-06					P43487	1.673e-07		Q13868	8.6e-06		Q6FHP5	1.1133e-05		Q0QEL2	0.005778		Q32P42	1.1e-06		Q53ES0	29215		Q15435	2.7499e-07
P48681	0.01653		Q9UG59	0.00068951		Q59GX6	2.2969e-08		Q59FF0	4.5e-06					P46087	2.0703e-07		Q13907	3.7e-06		Q6FHU3	2.3073e-05		Q0QER2	1.4068e-05		Q32Q10	55101		Q53F55	6.4e-06		Q15582	0.00041334
P49321	3.6763e-06		Q9UHB9	1.0628e-07		Q59H09	3.5714e-08		Q59FG2	2.6e-06					P46783	4.1938e-05		Q14008	1e-07		Q6FHV6	1.0162e-07		Q0VGA5	0.011833		Q32Q12	94967		Q53FB0	1232		Q15738	1.8596e-07
P49327	5.269e-05		Q9UIQ6	1.6208e-07		Q59H15	5.6262e-05		Q59FH0	0.0004					P46940	0.0029089		Q14019	0.00054		Q6FHZ0	0.023744		Q10471	0.0094865		Q32Q67	98049		Q53FG3	7.3e-07		Q16187	0.0063223
P49411	0.015041		Q9UKK9	8.0468e-08		Q59HE2	1.6095e-05		Q59FU3	0.0061					P48681	0.00026106		Q14247	56849		Q6FID4	8.5088e-08		Q12771	0.00021209		Q3B792	17517		Q53FN7	0.0002		Q16555	1.7539e-07
P49419	0.00079153		Q9UMY3	0.0070234		Q5H928	8.4621e-05		Q59FV6	0.065					P48723	0.00034804		Q14315	3.4e-05		Q6I9V5	0.0013153		Q12931	8.4964e-05		Q3B7A7	36439		Q53FR4	6e-07		Q16658	1.377e-07
P49588	0.0003285		Q9UNM1	1.3763e-07		Q5J7V8	0.00078406		Q59FV9	3.7e-06					P49189	0.00027732		Q14400	16078		Q6IAS8	1.0162e-07		Q13041	1.5674e-05		Q3B7B9	13681		Q53G34	188		Q16822	2.3788e-07
P49591	0.00049403		Q9UNN8	9.3895e-08		Q5JQ13	0.0012618		Q59FY9	2.6e-06					P49327	0.00084627		Q14666	7.8e-07		Q6IAW5	0.0094967		Q13126	1.7539e-07		Q3KNV1	9e-06		Q53G81	2e-06		Q1JQ76	0.00016684
P49792	0.0049698		Q9Y266	8.5088e-08		Q5JRX3	0.0004011		Q59G12	0.89					P49748	0.0075929		Q14696	8.2e-07		Q6IBG5	7.1675e-08		Q13263	1.1572e-07		Q3KPI8	16232		Q53GA0	4.3e-07		Q1LZN2	2.9889e-07
P49915	0.00076503		Q9Y2R0	5.517e-06		Q5JXB7	8.8948e-05		Q59G16	2.6e-06					P49773	1.6456e-07		Q14764	4.7e-06		Q6IBH6	1.1166e-07		Q13344	7.3276e-07		Q3KQZ8	2e-07		Q53GB3	25222		Q1XBU6	1.0244e-07
P50502	0.0077765		Q9Y3Z3	0.015288		Q5JYX0	4.7659e-06		Q59G24	0.013					P50502	9.5382e-08		Q14917	2e-07		Q6IBP2	8.7734e-08		Q13404	1.3328e-07		Q3LIF4	6e-07		Q53GB9	7.5e-07		Q2F831	9.7301e-06
P52306	2.2371e-07		Q9Y490	5.6718e-06		Q5QNZ2	3.3531e-05		Q59G26	0.46					P50570	0.00077917		Q14XT3	0.00048		Q6IC76	0.01602		Q13492	3.4178e-07		Q3MIH3	77144		Q53GE3	1e-07		Q2L6G3	1.6258e-07
P53004	0.00068828		Q9Y6K5	1.7139e-07		Q5QPL9	1.5804e-05		Q59GH7	5.4e-06					P53621	0.00066714		Q15020	5.1e-06		Q6LAP8	5.3089e-08		Q13707	0.00080558		Q3ZCQ8	8.3e-06		Q53GL5	8.2e-07		Q2NKY5	1.2531e-07
P53007	0.012139		R4GMQ5	3.3519e-08		Q5QTS3	3.3235e-05		Q59GL1	0.088					P53634	7.3767e-08		Q15029	5.7e-05		Q6LBS1	9.7523e-08		Q13727	4.7047e-06		Q49A78	1.6e-06		Q53GN6	35734		Q2TA84	0.000825
P54136	0.00027087		R4GMX5	0.00010349		Q5SU16	0.0006274		Q59GU5	0.096					P54578	0.00063524		Q15042	5.3e-06		Q6LET3	9.7523e-08		Q13868	2.9761e-07		Q49A90	12219		Q53GW1	2e-07		Q2TNB3	0.019003
P54652	2.3311e-05		S4R3N1	1.3065e-07		Q5T0I0	5.0049e-08		Q59GY3	0.62					P54886	9.0793e-05		Q15046	0.00052		Q6LEU0	0.014232		Q14108	0.00013509		Q49AD3	7e-07		Q53GY0	3.1e-07		Q2TTR7	3.9093e-06
P54727	0.00057228		T2DQ69	1.4214e-07		Q5T3N1	4.617e-05		Q59H15	0.043					P55060	0.00024872		Q15075	7.7e-06		Q6MZI6	7.6725e-06		Q14112	2.9761e-07		Q49AG2	18665		Q53H03	0.00091		Q2TUW9	2.2594e-05
P54819	0.0013097		U3KPR7	2.5802e-05		Q5T8U7	2.9729e-08		Q59H94	2e-07					P55145	1.5364e-07		Q15136	29601		Q6NTA2	9.3895e-08		Q14204	5.2582e-07		Q49AI3	0.00047		Q53HA4	0.00043		Q2VIK8	0.0012959
P54886	0.00019678		U3KQ84	0.0001001		Q5TEJ7	9.1773e-06		Q59HH3	7.8e-06					P55263	1.0876e-07		Q15149	1.4e-06		Q6NVC0	3.5228e-05		Q14315	5.4214e-06		Q4LE36	0.00084		Q53HE7	5.3e-06		Q2VIP3	0.029967
P55060	0.00046813		U3KQF3	0.0098848		Q5U0C3	0.00013044		Q5BKV1	3.4e-05					P55290	0.018761		Q15404	3.2e-05		Q6NXF2	7.5859e-08		Q14329	1.6827e-07		Q4LE60	8.6e-05		Q53HK8	42398		Q32Q12	1.4559e-05
P55145	0.0012967		U3PXP0	4.7629e-08		Q5U0I6	1.1633e-06		Q5CAQ4	4.6e-05					P56199	0.0015281		Q15417	96935		Q6NZI2	0.016319		Q14400	0.0050582		Q4QQP8	2.4e-06		Q53HW7	6.1e-07		Q32Q67	2.2001e-07
P55263	3.5422e-07		V9GYG0	6.5366e-08		Q5U5J2	2.86e-08		Q5H907	0					P61026	3.346e-06		Q15436	9.3e-07		Q6P0M4	1.4978e-07		Q14730	0.010668		Q4TT76	7.8e-06		Q53T76	0.00013		Q3B792	1.4253e-07
P55265	0.00022716		V9GYY3	5.4551e-06		Q5ZEZ4	0.01683		Q5H909	0					P61160	1.2842e-06		Q15459	37363		Q6P2D7	0.0098049		Q14917	1.673e-07		Q4W4Y1	0.0006		Q53Z07	3.9e-07		Q3B7X1	2.6208e-05
P55809	2.0678e-06		V9GZ37	4.1913e-06		Q60FE5	0.028192		Q5H924	1.1e-06					P61163	3.2057e-07		Q15582	7e-07		Q6PIX2	0.00010235		Q14XT3	0.0044574		Q504U8	7.8e-06		Q53ZP9	3.4e-06		Q3KQZ8	0.00024953
P60468	0.0092067		V9H023	1.9003e-07		Q65ZQ3	0.00075194		Q5JQ13	6.2e-05					P61326	1.8454e-07		Q15631	6.4e-07		Q6PJ76	0.024669		Q15006	6.0008e-07		Q53FG3	30303		Q569J8	0.00083		Q3LIE9	0.0024187
P61009	0.014058		V9HW84	6.0257e-05		Q69EZ8	2.2384e-08		Q5M7Z9	4.7e-05					P61956	1.3713e-05		Q15645	1.3e-06		Q6PJM5	0.024669		Q15075	1.601e-07		Q53FG5	10295		Q56G89	5.5e-05		Q3MHV2	0.0068198
P61026	4.8571e-07		V9HWD6	9.2915e-07		Q6FGD7	1.0584e-06		Q5NKV8	4.8e-06					P61981	3.5388e-05		Q15691	7e-06		Q6PJT4	0.00011465		Q15404	2.5804e-07		Q53FI1	84194		Q58FF2	5e-06		Q3MI39	0.019895
P61081	2.1195e-07		V9HWE1	7.3244e-05		Q6FGE5	1.1252e-08		Q5RLJ0	2.8e-06					P62314	1.8493e-05		Q15717	26937		Q6PJY1	0.020848		Q15435	3.0185e-07		Q53FN7	10933		Q58FF9	3.4e-07		Q3MIH3	0.0043949
P61163	8.7628e-05					Q6FGG2	2.0844e-08		Q5SSJ5	7e-06					P62333	2.7045e-05		Q15758	9.6e-06		Q6PJY7	7.6556e-08		Q15459	0.00014544		Q53FV3	79278		Q59E93	2.7e-05		Q3SYK8	5.6752e-07
P61326	0.023079					Q6FGX3	2.6641e-08		Q5T0I0	6.4e-06					P67812	1.5364e-07		Q15942	72534		Q6PK56	0.0022379		Q15463	1.3436e-07		Q53FW2	24059		Q59EF6	2.1e-06		Q49A78	1.2876e-07
P61803	0.017353					Q6FHF5	0.00095376		Q5TA01	0.29					P67936	1.8587e-05		Q16187	10037		Q6PKD2	0.0059182		Q15582	7.224e-05		Q53G69	6.4e-06		Q59ES3	5e-07		Q49A90	0.027957
P62312	0.001071					Q6FHJ9	3.7346e-06		Q5U071	0.00018					P68363	0.0030841		Q16643	7e-07		Q6TXQ4	0.0049198		Q15738	2.352e-07		Q53G72	19987		Q59ET3	0.00024		Q4G148	1.3248e-07
P62826	9.9796e-06					Q6FHM6	1.9964e-08		Q5VU62	0.66					P80723	1.0054e-07		Q16706	8.6e-06		Q6UVK1	0.0021067		Q15758	0.00026232		Q53G81	7112		Q59EV6	9.3e-06		Q4LE36	0.00019457
P62917	0.00095717					Q6FHP5	1.8326e-05		Q5W0H4	8.6e-06					P84077	1.2366e-07		Q16836	3.7e-05		Q6W6M8	0.003188		Q16222	2.352e-07		Q53GA0	4425		Q59EZ3	3.9e-06		Q4LE58	4.5635e-07
P62979	0.0055235					Q6FHV6	9.4301e-05		Q6DC98	0.0079					Q00325	1.6343e-06		Q16851	24031		Q6ZNL4	0.0038615		Q16555	1.7539e-07		Q53GE3	9e-05		Q59F25	7.6e-06		Q4QQP8	2.7232e-07
P80723	0.00017914					Q6FHX6	0.00068513		Q6DD88	0.22					Q00765	1.9655e-07		Q16881	10401		Q6ZVI6	0.029257		Q16658	0.025569		Q53GG0	1071		Q59F44	0.00037		Q4W4Y1	1.8454e-07
P82979	0.0047014					Q6FI37	0.0045931		Q6DRA6	0.041					Q02978	3.5538e-07		Q1AHP8	11522		Q7KYK3	0.00041297		Q16706	0.00012227		Q53GQ8	2e-06		Q59F66	4.7e-07		Q502X2	4.7671e-05
Q00341	0.00070391					Q6FI54	4.0077e-08		Q6FGD7	0.068					Q04837	8.0567e-05		Q1G0L6	16524		Q7KYM9	0.0083537		Q16791	0.0049178		Q53GS1	6.9e-06		Q59FF0	3.9e-07		Q504U8	4.4157e-07
Q01813	0.0015707					Q6I9V5	1.2902e-05		Q6FGH9	4.1e-06					Q05BX4	0.00020792		Q1XBU6	19003		Q7L4M3	0.0056152		Q16822	2.3788e-07		Q53GX7	0.00027		Q59FG2	5.1e-07		Q53EM5	0.025569
Q02218	0.00029177					Q6IAW5	0.0056336		Q6FHJ9	0.097					Q05CK9	7.0417e-05		Q27J81	24773		Q7L4N0	6.33e-08		Q16836	0.031284		Q53GZ5	48533		Q59FI0	11407		Q53ET2	1.7539e-07
Q03252	3.9304e-06					Q6IB58	2.9729e-08		Q6FHV6	0.096					Q05CR5	1.2208e-07		Q28617	28436		Q7L553	2.2756e-05		Q16881	1.0322e-07		Q53HA4	30208		Q59FQ4	9.5e-05		Q53ET8	1.3721e-06
Q05BV1	1.0833e-05					Q6IB76	3.5714e-08		Q6FHX6	0.35					Q05D06	0.00010139		Q2KQ72	2.2e-06		Q7Z3Z9	0.00011312		Q1JQ76	5.2595e-05		Q53HJ4	8.9e-06		Q59FV6	17914		Q53F26	1.4557e-07
Q05BW3	0.028026					Q6IBG5	3.081e-05		Q6FI03	2.4e-06					Q05D08	0.00059001		Q2TB90	9e-08		Q7Z4W8	5.4223e-08		Q1XBU6	1.0244e-07		Q53HJ6	33755		Q59G92	3e-08		Q53F35	8.0625e-07
Q05BW9	2.8558e-05					Q6IBH6	1.8326e-05		Q6I9V5	0.94					Q05D43	0.0024773		Q2TNB3	0		Q7Z4Y3	1.1795e-07		Q2F831	0.00097719		Q53HJ8	8.1e-06		Q59G96	83172		Q53F55	9.2648e-05
Q05BX4	0.0012967					Q6IBN1	0.00012099		Q6IAX2	0.21					Q05D48	0.02654		Q2TTR7	7.7e-06		Q7Z675	0.014065		Q2L6G3	1.7758e-07		Q53HP2	28491		Q59GL1	17827		Q53FA5	1.673e-07
Q05C82	3.0508e-05					Q6IBS5	0.0027505		Q6IAX6	0.0074					Q05D76	0.00036524		Q2VIR3	1.1e-06		Q86TY5	7.4813e-08		Q2TNB3	0.010421		Q53HU0	31464		Q59GX5	4.3e-07		Q53FB0	1.2259e-05
Q05CK9	0.0021067					Q6IBT3	0.00014069		Q6IBA2	0.013					Q05DA4	0.00014399		Q2XQU9	11613		Q86UY0	0.0016979		Q2TTR7	4.4151e-05		Q53HW7	90954		Q59H15	1.4e-07		Q53FG5	5.077e-05
Q05CM9	0.0011726					Q6LAF9	0.00017549		Q6IBG5	0.0001					Q05DJ8	9.8737e-08		Q32P42	3.5e-06		Q86VG2	0.00012495		Q2TUW9	5.2361e-08		Q53Z07	32863		Q59H94	7e-08		Q53FN7	1.9579e-07
Q05CU6	4.9575e-05					Q6LAP8	2.6641e-08		Q6IBH6	0.89					Q07666	0.00066203		Q32Q10	5.6e-05		Q86WV2	4.3434e-08		Q2VIK8	0.0054544		Q53ZP9	8.6e-06		Q59HE2	0		Q53FR4	0.00010964
Q05D08	0.00012053					Q6LBS1	7.141e-06		Q6IBM8	1.7e-06					Q07812	1.7219e-07		Q32Q12	0.00059		Q86XP3	1.4214e-07		Q2VIN3	0.00060367		Q549M8	0.00028		Q5CAQ5	2.5e-05		Q53FS6	0.00025513
Q05D33	0.0045796					Q6LC01	0.00025875		Q6IBN1	0.003					Q07955	6.2714e-07		Q32Q67	10245		Q86XU5	0.00024757		Q2VPJ6	6.8394e-05		Q567R9	14297		Q5FWG8	12773		Q53G34	6.376e-07
Q05D48	0.00054354					Q6LCB5	2.1325e-08		Q6IBQ5	0.007					Q08211	0.00029615		Q3B792	5.5e-07		Q86Y82	0.014232		Q2YD88	0.0030841		Q567U8	1653		Q5H928	13345		Q53G72	0.00041334
Q08431	1.6563e-07					Q6LER6	9.9254e-06		Q6IBR2	0.073					Q08257	1.0653e-07		Q3B7A7	2e-06		Q8IUB0	0.0038924		Q32Q10	2.5804e-07		Q58F05	0.00087		Q5I6Y5	1.4e-07		Q53GE3	1.0881e-06
Q08945	3.0484e-05					Q6LET3	2.2969e-08		Q6IBT3	0.05					Q08ET0	2.9838e-07		Q3B7B9	3.7e-06		Q8N0Y7	0.00019376		Q32Q12	5.1448e-08		Q58F09	9.7e-05		Q5J7V8	2.5e-05		Q53GK6	0.0015806
Q08ES8	0.00038536					Q6MZI6	0.000362		Q6IC76	0.078					Q08J23	1.136e-07		Q3B7W7	5.6e-05		Q8N4V1	9.7523e-08		Q3B792	1.4253e-07		Q58F26	1.9e-05		Q5J908	4.3e-07		Q53GL6	0.0014013
Q08J23	0.013613					Q6NS36	7.0877e-05		Q6LC01	0					Q09161	0.0001275		Q3KNV1	6.3e-07		Q8N519	6.1434e-08		Q3B7A3	1.0054e-07		Q58FF2	1.3e-05		Q5JQ13	1.3e-05		Q53GN4	1.0291e-05
Q09161	0.00090682					Q6NVC0	3.3075e-05		Q6LDX7	0.66					Q0D2M2	2.0876e-05		Q3KPI8	0.00078		Q8NBS9	0.0016979		Q3B7W7	1.8454e-07		Q58FF3	9e-06		Q5JRS2	0.00011		Q53GR7	9.5261e-05
Q0D2M2	0.0048505					Q6NVI4	2.9928e-08		Q6LEU0	5.4e-06					Q0EFC9	1.7441e-05		Q3KQZ8	2.3e-07		Q8NBX0	6.5366e-08		Q3KQZ8	1.4253e-07		Q58FF9	16613		Q5JTV8	0.00037		Q53GS1	1.0132e-06
Q0EFC9	0.001071					Q6NVW9	7.1201e-06		Q6NTA2	0.0022					Q0IJ56	9.5382e-08		Q3MI39	44773		Q8NCW5	1.1166e-07		Q3LIE9	0.0086883		Q58FG1	0.00069		Q5JWS0	6.6e-07		Q53GW3	0.00017044
Q0IIN5	0.00031769					Q6NWZ1	0.00022624		Q6NUR1	4.1e-06					Q0QEL2	0.00047258		Q3MIH3	0.00099		Q8NF19	0.0098049		Q3MI39	7.3767e-08		Q59E93	3.6e-05		Q5JYX0	20208		Q53H82	3.0736e-07
Q0IJ56	0.0077765					Q6NXF2	0.0038434		Q6NUR7	0.00096					Q0QER2	0.0018924		Q3ZCQ8	4.9e-06		Q8TAS6	1.0162e-07		Q3MIH3	5.3552e-05		Q59EC0	0.00072		Q5M7Z5	5.4e-07		Q53HA4	0.0017963
Q0QF12	1.9485e-06					Q6NZ44	3.1379e-05		Q6NVI4	4.1e-06					Q0QF12	3.6152e-05		Q49A78	8.7e-07		Q8TBX0	9.3895e-08		Q3SYK8	5.6752e-07		Q59EF6	30347		Q5QNZ2	6e-05		Q53HB3	0.00017319
Q0VGA5	0.00049403					Q6P1N4	0.0011911		Q6NVV1	0.001					Q0VGA5	5.5195e-05		Q49A90	0.00065		Q8TC12	8.2677e-08		Q49A90	3.2453e-05		Q59EZ3	8.6e-06		Q5ST81	0.00041		Q53HB7	4.7671e-05
Q0VGD6	0.018461					Q6P587	8.3598e-05		Q6NVY0	0.0041					Q0VGD6	0.00022856		Q49AD3	4.1e-06		Q8TEP9	0.024669		Q49AG2	2.0706e-07		Q59F03	0.00014		Q5SX91	2.7e-07		Q53HG5	1.564e-07
Q0ZGT2	0.00060223					Q6PIX2	0.00046353		Q6NX68	2e-07					Q10471	2.6741e-05		Q49AG2	2.9e-06		Q8TES4	5.8363e-05		Q4LE36	1.6456e-05		Q59F25	5e-06		Q5T0I0	0.00033		Q53HJ4	2.9452e-07
Q10713	2.889e-07					Q6PJ43	0.00040572		Q6P0M4	7.3e-06					Q10713	1.2214e-07		Q49AI3	7.7e-06		Q8WUI6	0.0045796		Q4LE58	4.5635e-07		Q59FC6	0.00083		Q5T0R3	0.00082		Q53HQ0	1.3673e-07
Q12771	0.0014144					Q6PJ72	2.2109e-05		Q6P1L4	7.3e-06					Q12771	0.00059001		Q4KWH8	8.2e-07		Q8WV80	9.7523e-08		Q4W4Y1	1.8454e-07		Q59FD8	0		Q5T205	21157		Q53HS0	0.00088075
Q12797	2.889e-07					Q6PJT4	0.00061241		Q6P1N4	1.4e-06					Q13041	0.00010591		Q4LE36	8e-05		Q8WVM8	0.0098049		Q502X2	1.673e-07		Q59FF0	0.00026		Q5T3N0	16753		Q53HW7	2.1728e-05
Q12931	7.4215e-05					Q6PJY1	0.00052598		Q6P1Q5	0.29					Q13126	1.7539e-07		Q4LE60	5.6e-05		Q8WY81	0.030697		Q53ET2	1.7539e-07		Q59FG2	2.6e-06		Q5T624	0.00054		Q53XL8	0.0012883
Q12965	0.00074406					Q6PJY7	3.5583e-08		Q6P474	2e-07					Q13263	0.0064279		Q4QQP8	8.8e-06		Q8WYJ5	8.5088e-08		Q53F55	3.0314e-07		Q59FH0	10933		Q5T626	0.00091		Q53Z07	1.578e-05
Q13011	1.5558e-07					Q6PK50	0.0032343		Q6P6D7	0.71					Q13404	1.3328e-07		Q4TT76	2e-06		Q92520	6.8923e-08		Q53FA5	1.673e-07		Q59FU3	13222		Q5TBR1	7.4e-07		Q53ZP9	2.9316e-07
Q13041	0.0022198					Q6PKD2	0.00061241		Q6P996	2e-07					Q13492	5.7173e-05		Q4W4Y1	8.7e-07		Q92616	0.00041621		Q53FB0	0.022537		Q59FV6	19363		Q5U0B3	6e-07		Q549M8	5.0324e-07
Q13217	9.9835e-08					Q6ZNL4	0.00023961		Q6PJJ3	5.9e-06					Q13727	0.0038228		Q504U8	2e-06		Q92791	1.2078e-07		Q53FG3	0.00032045		Q59FV9	3.7e-06		Q5U5J2	7e-08		Q562Z6	0.00020447
Q13283	3.5422e-07					Q70UQ0	1.6713e-08		Q6PJL0	9.8e-06					Q13868	2.9761e-07		Q53EY8	2e-07		Q92820	0.0052765		Q53FG5	1.9499e-07		Q59FY9	2.6e-06		Q5VSR5	7e-07		Q567R9	8.0625e-07
Q13344	2.9463e-05					Q7Z497	1.4044e-06		Q6PJT4	0.063					Q14108	0.0016726		Q53F60	12408		Q93008	1.4581e-07		Q53FK2	2.352e-07		Q59G12	10813		Q5VXV3	8.9e-07		Q58F26	3.4862e-05
Q13724	5.087e-05					Q7Z4W8	4.3128e-05		Q6PJY1	0.85					Q14112	0.00013559		Q53FA5	0.00027		Q93020	6.33e-08		Q53FN7	2.5322e-07		Q59G16	2.6e-06		Q5ZEY3	5e-05		Q59E93	0.0087454
Q13727	0.0055235					Q7Z7J6	0.00012287		Q6PJY7	5.7e-06					Q14204	1.5376e-07		Q53FG3	54118		Q969G5	1.0162e-07		Q53FR4	1.8602e-07		Q59G24	14973		Q6DC98	7e-08		Q59EF6	1.6264e-07
Q13850	0.0042103					Q7Z7M4	3.3235e-05		Q6PK50	0.0004					Q14315	0.0088964		Q53FG5	7.7e-06		Q969X5	0.01008		Q53FS6	2.9511e-05		Q59G26	38898		Q6FGS1	4.3e-07		Q59EI9	0.0034109
Q13868	4.0467e-07					Q7Z7M5	6.7253e-05		Q6PK56	0.0006					Q14329	0.0004314		Q53FI1	15363		Q96A33	0.00047554		Q53G34	1.0054e-07		Q59GH7	5.4e-06		Q6FGU2	6.6e-06		Q59ET3	0.023731
Q13907	0.0027671					Q86TQ8	0.00050575		Q6PKD2	0.39					Q14400	5.5052e-05		Q53FN7	33007		Q96AR9	0.022221		Q53G72	1.1025e-07		Q59GU5	12807		Q6FHE4	0.00044		Q59EV6	1.9499e-07
Q14008	0.00028959					Q86UY0	0.0054022		Q6QE17	0.00041					Q14455	1.365e-07		Q53FS4	24539		Q96BG6	0.0049698		Q53GE3	3.5535e-08		Q59GX6	14439		Q6FHK8	73168		Q59F25	0.029405
Q14019	0.0063193					Q86VG2	0.00046353		Q6TXQ4	0.009					Q14666	1.0876e-07		Q53FU3	7e-06		Q96C71	8.0468e-08		Q53GK6	3.7285e-05		Q59H15	23734		Q6FHP5	31769		Q59F66	2.3013e-07
Q14247	0.00036439					Q86XU5	0.00026085		Q6U7G8	2.4e-06					Q14730	0.00034699		Q53FV3	10121		Q96DB5	9.3895e-08		Q53GL6	0.0050582		Q59H94	0.00096		Q6FHU3	16637		Q59F68	4.8798e-05
Q14315	1.2358e-06					Q86YQ4	1.4781e-08		Q6U8A4	2.8e-06					Q14917	6.1347e-05		Q53FW2	35306		Q96G03	0.0030888		Q53GN4	0.012165		Q59HH3	36439		Q6FHV6	2e-07		Q59FA2	3.4178e-07
Q14329	0.00012859					Q8IUB0	0.014569		Q6UVK1	8.5e-06					Q14XT3	1.2545e-07		Q53G69	5.6e-06		Q96GX3	7.8435e-08		Q53GQ8	0.00056849		Q5BKV1	9e-05		Q6FHX6	4.8e-07		Q59FC6	0.0055116
Q14455	2.3261e-07					Q8IV28	1.3317e-05		Q6W6M8	7.1e-05					Q15075	0.00266		Q53G72	0.00034		Q96H31	7.966e-05		Q53GR7	0.022986		Q5CAQ4	9.8e-05		Q6FHZ0	0.00024		Q59FF0	2.0876e-05
Q14696	0.0058428					Q8IXJ3	1.3358e-05		Q6ZVI6	0.3					Q15404	2.5804e-07		Q53G81	0.0004		Q96HY6	1.0628e-07		Q53GW3	0.0065087		Q5H907	0		Q6FID4	5e-06		Q59FH0	0.00011436
Q14730	0.0033755					Q8IY98	2.2109e-05		Q701L7	9.6e-06					Q15424	1.7728e-07		Q53GA0	8.2e-07		Q96IF9	0.023316		Q53GX7	0.00010275		Q5H909	0		Q6I9U3	0.00064		Q59G75	0.00041334
Q14764	7.4501e-06					Q8N4C5	3.7739e-08		Q71UA4	4.1e-06					Q15435	1.564e-07		Q53GB9	7e-07		Q96IR1	6.4306e-08		Q53H82	3.0736e-07		Q5H924	1.1e-06		Q6IAS8	7.8e-06		Q59GM9	3.2446e-07
Q14917	2.2371e-07					Q8N5K1	2.0548e-08		Q71UA6	2.6e-06					Q15459	0.0016796		Q53GE3	0.00089		Q96IX5	6.8923e-08		Q53HA4	0.011833		Q5H928	43702		Q6IAW5	0.00036		Q59GW6	0.0002448
Q14974	7.187e-06					Q8N5M8	0.00019518		Q75MY8	0.028					Q15463	0.0011308		Q53GR7	12676		Q96QB7	4.0505e-08		Q53HB3	0.0040134		Q5J908	24669		Q6IBH6	9.9e-06		Q59GX6	2.8503e-07
Q15020	0.0006377					Q8NBH6	0.0036035		Q76LA1	8e-07					Q15582	9.7278e-08		Q53GS1	7e-06		Q96QK1	0.0049198		Q53HB7	1.673e-07		Q5JQ13	2.2e-05		Q6IBN1	0.00012		Q59H15	0.00081982
Q15029	0.0017827					Q8NBJ7	2.5785e-08		Q76MU0	0.0062					Q15738	1.365e-07		Q53GX7	5.7e-07		Q96RE1	0.0038924		Q53HG5	3.08e-07		Q5JYX0	1.2e-06		Q6IBP2	7.7e-07		Q59H94	0.00059347
Q15042	5.4988e-07					Q8TC62	1.4253e-05		Q7KYM9	0.94					Q15758	0.0032939		Q53GZ5	1.8e-06		Q99529	7.7908e-05		Q53HH2	0.00019748		Q5M7Z5	5072		Q6IBS5	5.1e-07		Q59HE2	0.00022856
Q15046	0.00091813					Q8TCT9	2.9729e-08		Q7KYN0	1.2e-06					Q16187	0.00033221		Q53H82	6.3e-06		Q99685	9.7523e-08		Q53HJ4	2.9452e-07		Q5M7Z9	0.00027		Q6IC76	0.00055		Q59HF3	0.00061516
Q15075	3.859e-07					Q8TES4	0.021769		Q7KZF4	4.5e-06					Q16222	1.0054e-07		Q53HH2	0.0003		Q99720	5.3646e-08		Q53HS0	1.7539e-07		Q5NKV8	4.8e-06		Q6LBS1	5.3e-06		Q5H928	2.6121e-05
Q15149	0.0058962					Q8WUI6	0.00017708		Q7L4N0	0.07					Q16555	6.0014e-05		Q53HJ4	3.2e-06		Q99988	0.0040811		Q53HW7	0.0003258		Q5QPK2	27045		Q6LC01	0.00077		Q5JP53	0.00022418
Q15293	0.00048182					Q8WUM0	3.926e-07		Q7L9L4	0.24					Q16658	0.00014065		Q53HJ6	2.3e-07		Q9BPW8	6.6485e-08		Q53XL8	0.0004961		Q5RLJ0	0.00028		Q6LEU0	8.9e-07		Q5JQ13	0.00019457
Q15404	5.2996e-05					Q8WUQ0	3.053e-08		Q7RU04	0.0059					Q16706	0.004594		Q53HJ8	2.9e-06		Q9BQ02	0.012356		Q53Z07	1.788e-05		Q5SSJ5	7e-06		Q6MZI6	29202		Q5JRS0	0.0013556
Q15417	0.00013418					Q8WV80	3.5583e-08		Q7Z3Z9	1.2e-06					Q16791	0.0007627		Q53HK8	1.4e-06		Q9BR63	1.0162e-07		Q53ZP9	6.0658e-07		Q5SX86	2282		Q6NSF2	3e-05		Q5JRX3	3.7963e-05
Q15436	0.00035006					Q8WVM8	2.9729e-08		Q7Z4W1	4.8e-06					Q16822	0.00010191		Q53HP2	0.00082		Q9BSE8	3.3359e-08		Q549M8	5.0324e-07		Q5SX87	2282		Q6NTA2	11617		Q5JTV8	0.00032248
Q15459	1.3159e-06					Q8WYJ5	3.3864e-05		Q7Z4X0	5e-06					Q16836	0.00062388		Q53HS0	19219		Q9BSQ6	5.9737e-08		Q562Z6	0.0032797		Q5SX90	2885		Q6NWZ1	0.0004		Q5M7Z5	1.6956e-07
Q15582	4.0467e-07					Q92799	0.00067107		Q7Z4Y3	9.6e-06					Q16881	0.00016669		Q53HU8	65592		Q9BST8	0.0070919		Q569J8	0.0043949		Q5T0I0	6.4e-06		Q6NXF2	5.9e-07		Q5QNZ2	1.673e-07
Q15631	1.0807e-05					Q92820	2.2954e-05		Q7Z7J6	0.052					Q1JQ76	0.00017183		Q53HW7	11732		Q9BSW5	5.6088e-08		Q58F09	1.4663e-05		Q5T5C7	30208		Q6NZI2	6.5e-05		Q5QPL9	0.0012397
Q15645	6.8177e-07					Q92841	2.9328e-05		Q86SE5	0.073					Q1XBU6	9.5382e-08		Q53XL8	81243		Q9BTV4	0.026994		Q58F26	6.5635e-06		Q5T765	3.7e-06		Q6P2D7	8.2e-07		Q5QTS3	1.082e-05
Q15657	8.356e-05					Q92900	2.9729e-08		Q86SX1	0.00032					Q2F831	1.3452e-05		Q53Y51	2.2e-06		Q9BTY2	9.3895e-08		Q58FF2	4.7558e-06		Q5TA01	64476		Q6PIN5	70391		Q5RKV6	2.2116e-07
Q15691	4.0104e-06					Q969X5	5.679e-05		Q86TX4	0.00032					Q2TA84	0.0001147		Q53Z07	6.3e-07		Q9BV28	1.1166e-07		Q59E93	8.2608e-06		Q5TBR0	26023		Q6PIX2	3e-06		Q5RLJ0	5.0324e-07
Q15717	0.02726					Q96A33	3.7739e-08		Q86U75	0.0044					Q2TNB3	1.4782e-07		Q53ZP9	7.7e-06		Q9BVC6	7.049e-06		Q59EF6	1.4557e-07		Q5U071	92198		Q6PJ43	0.00044		Q5SU16	0.00021952
Q15942	0.00049807					Q96AG4	7.0139e-06		Q86V81	0.75					Q2TTR7	0.00023687		Q549M8	5.1e-06		Q9BVS9	0.00042128		Q59EL5	5.3997e-08		Q5U5J2	24669		Q6PJ72	6e-07		Q5T085	1.7728e-07
Q16222	0.00013909					Q96AR9	0.00014069		Q86VP6	4.6e-05					Q2VIK8	0.0017008		Q567R9	0.00047		Q9BWD1	0.01089		Q59ES3	0.00026232		Q5VTE0	10031		Q6PJ76	1.3e-05		Q5T0I0	2.3474e-07
Q16555	3.0837e-05					Q96B07	0.0015119		Q86X91	6e-06					Q2VIN3	0.00032448		Q567U8	7e-06		Q9BXP5	1.3872e-07		Q59EV6	1.9499e-07		Q5VXV3	26276		Q6PJM5	5.1e-07		Q5T3N1	0.0097444
Q16643	0.00056538					Q96B85	0.0060261		Q86XE2	2e-07					Q2VIP3	0.00022289		Q569J8	28436		Q9BXV4	3.582e-08		Q59EY4	1.0054e-07		Q65ZQ3	15092		Q6PJT4	40683		Q5T5C7	0.0017963
Q16706	0.010247					Q96BA7	0.0011911		Q8IY97	6e-06					Q2VPJ6	0.00017978		Q58F05	3.7e-06		Q9BXV5	1.1166e-07		Q59F03	6.1076e-05		Q6DD88	54354		Q6PJY1	9.3e-05		Q5TBR1	0.0059221
Q16836	0.0057265					Q96BG6	0.0035127		Q8IZP2	0.0084					Q2YD88	3.7547e-05		Q58F09	1.4e-05		Q9BZ93	4.1404e-08		Q59F25	2.6258e-07		Q6DRA6	17307		Q6PJY7	6.6e-07		Q5TCD1	2.102e-05
Q16851	0.0059268					Q96CP5	3.5714e-08		Q8N0Y7	0.78					Q32Q10	2.5804e-07		Q58FF2	9.9e-05		Q9BZT2	7.6556e-08		Q59F66	0.0024137		Q6FG59	12139		Q6PK56	0.00087		Q5TEJ7	9.2325e-05
Q1AHP8	2.4796e-07					Q96DG6	0.00050916		Q8N163	7.7e-06					Q32Q12	6.5044e-06		Q58FF3	1.2e-05		Q9H3N1	4.3999e-08		Q59F68	0.00015614		Q6FGD7	74406		Q6PKD2	0.0002		Q5U0C3	0.010133
Q1G0L6	9.0199e-06					Q96E39	0.0014781		Q8N1F7	4.3e-06					Q32Q20	2.352e-07		Q58FF9	10608		Q9H488	0.013613		Q59FA2	3.4178e-07		Q6FGE5	10171		Q6S8J3	11878		Q5U0I6	9.1388e-05
Q1XBU6	0.0077765					Q96H31	0.00013124		Q8N519	0.0043					Q3B792	1.4253e-07		Q58FG1	0.00023		Q9H7Z7	9.7523e-08		Q59FC6	1.3398e-05		Q6FGG2	2726		Q6TXQ4	42578		Q5U5J2	1.1111e-07
Q27J81	4.7822e-07					Q96IF9	0.00015927		Q8N6B4	0.8					Q3B7A3	5.8826e-08		Q59E93	9.3e-07		Q9HAP0	0.0016285		Q59FF0	8.3892e-08		Q6FGS1	4425		Q6UVK1	5.5e-05		Q5VSQ6	1.8596e-07
Q28617	0.00019837					Q96IR1	4.5187e-05		Q8NBJ5	0.019					Q3B7A7	2.0703e-07		Q59EC0	2.5e-06		Q9HAP1	0.023316		Q59FG2	1.3615e-05		Q6FGU2	29792		Q6W6M8	5.4e-07		Q5VU62	1.7539e-07
Q2KQ72	0.00072513					Q96IS6	0.021187		Q8NCA5	5e-07					Q3B7W7	1.8454e-07		Q59EF6	22697		Q9HAV7	7.319e-08		Q59FH0	0.0061533		Q6FH17	11717		Q6ZNL4	5.5e-05		Q5VXV3	6.8435e-08
Q2TB90	0.00044418					Q96MR6	0.0003774		Q8NG23	0.05					Q3B7X1	3.2589e-05		Q59EL5	35306		Q9HBB2	0.0018777		Q59G26	4.4866e-06		Q6FHJ9	17074		Q6ZVI6	4.5e-05		Q5ZEZ4	0.00030819
Q2TNB3	0.00026657					Q96QB7	0.0095767		Q8TAS6	3.7e-06					Q3LIE9	6.4229e-05		Q59EZ3	7.7e-06		Q9NPA9	0.0045796		Q59G75	1.4115e-05		Q6FHK7	8552		Q70UQ0	7.5e-07		Q60FE5	9.1296e-05
Q2TTR7	0.00046813					Q96RE1	0.014569		Q8TBR3	0.007					Q3MHV2	9.7762e-05		Q59F03	2e-06		Q9NQ88	1.0628e-07		Q59GL1	0.0041065		Q6FHK9	30697		Q71RH4	6.5e-07		Q65ZQ3	0.029473
Q2VIN3	0.00046588					Q99460	0.00014148		Q8TC62	0.21					Q3MI39	0.0021414		Q59F25	5.3e-06		Q9NSD9	1.0162e-07		Q59GM9	6.4689e-07		Q6FHP5	13613		Q71V33	0.00051		Q6DC98	0.0024201
Q2VIP3	1.8277e-06					Q99529	0.00041857		Q8TCG4	0.073					Q3MIH3	0.0023054		Q59FC6	0.0009		Q9NUJ1	1.2796e-07		Q59GX6	3.178e-07		Q6FHU3	15288		Q75MY7	56538		Q6FGD7	3.8315e-08
Q2VIR3	2.4254e-07					Q99720	2.0809e-05		Q8TD27	0.051					Q3SYK8	7.9998e-05		Q59FD8	1e-05		Q9NYU2	0.0018777		Q59H94	5.9854e-06		Q6FHV6	11914		Q7KYK3	8.4e-07		Q6FGG2	6.0658e-07
Q2XQU9	0.0012112					Q9BQ02	4.2691e-05		Q8WUI6	5.7e-06					Q49A78	1.0443e-07		Q59FF0	2.5e-05		Q9NZ08	0.0058729		Q59HF3	0.0011621		Q6FI03	8.6e-06		Q7KYM9	6.5e-07		Q6FGU2	0.0050888
Q32P42	5.11e-07					Q9BSD0	0.00042605		Q8WUM4	1.6e-06					Q49A90	0.010991		Q59FG2	9.6e-06		Q9NZS6	0.0066755		Q5H928	1.208e-05		Q6FIG4	14592		Q7L4M3	2e-05		Q6FGX3	1.3721e-06
Q32Q10	0.00044306					Q9BSE8	3.6652e-05		Q8WVM8	0.068					Q49AG2	2.0706e-07		Q59FH0	19003		Q9P0I2	1.2102e-07		Q5J7V8	0.00070581		Q6FII1	3.3e-06		Q7L553	7e-05		Q6FHJ9	4.8324e-07
Q32Q12	0.00033083					Q9BSQ6	2.8095e-06		Q8WY81	2.6e-06					Q4G148	8.6936e-08		Q59FU3	66746		Q9P1A0	0.00045084		Q5JP53	0.00059583		Q6I9V5	65214		Q7RTM4	7.4e-07		Q6FHK7	1.4253e-07
Q32Q67	3.5422e-07					Q9BSW5	0.00018023		Q8WYJ5	8.1e-06					Q4LE36	0.00023175		Q59FV6	15158		Q9P1N1	0.0018777		Q5JQ13	6.5388e-06		Q6IAX2	3335		Q7Z3Z9	1.2e-06		Q6FHK8	1.2054e-05
Q3B792	0.000186					Q9BTI9	0.00013876		Q92526	0.08					Q4LE58	0.00022532		Q59FV9	9e-07		Q9P2E9	0.015156		Q5JRS0	1.183e-06		Q6IAX6	30888		Q7Z4W8	6e-07		Q6FHK9	0.01054
Q3B7A7	4.7822e-07					Q9BUV4	2.8747e-05		Q92542	4.3e-06					Q4QQP8	2.7792e-07		Q59FY9	9.6e-06		Q9UBG0	0.0016285		Q5JRX3	2.0871e-07		Q6IBA2	14973		Q7Z4Y3	1.8e-06		Q6FHP5	0.026355
Q3B7W7	0.0026604					Q9BV61	3.4904e-05		Q92616	5.4e-06					Q4W4Y1	0.00026106		Q59G16	9.6e-06		Q9UBQ7	0.032863		Q5JTV8	8.455e-05		Q6IBG5	1071		Q7Z675	6.7e-06		Q6FHU3	2.3788e-07
Q3B7X1	0.00011135					Q9BXV5	2.2764e-05		Q92797	7e-07					Q502X2	3.6944e-05		Q59G24	3.3e-07		Q9UFN0	9.7523e-08		Q5JXB7	2.0885e-06		Q6IBM8	13129		Q86SW4	5e-08		Q6FHV6	1.1289e-07
Q3KNV1	2.7115e-07					Q9BZ93	0.00096936		Q92799	0.015					Q53EM5	0.00067644		Q59G26	75963		Q9UG59	2.222e-06		Q5JYX0	3.9262e-07		Q6IBN0	23449		Q86TY5	4.3e-06		Q6FI52	1.2332e-05
Q3KPI8	0.00056954					Q9BZT2	2.86e-08		Q92804	0.0044					Q53ET2	6.0014e-05		Q59GH7	6.3e-06		Q9UHA4	6.8923e-08		Q5M7Z9	0.00010275		Q6IC76	2276		Q86U75	0.0004		Q6FID4	1.4782e-07
Q3KQZ8	0.00017914					Q9BZY1	3.5714e-08		Q92900	8.1e-06					Q53F55	3.0314e-07		Q59GX6	38292		Q9UIJ7	4.9237e-08		Q5QPL9	0.0064672		Q6LBS1	13373		Q86UY0	0.0001		Q6I9V5	0.0034109
Q3LIE9	0.0018777					Q9H2R8	3.2375e-08		Q93020	5e-07					Q53FA5	1.673e-07		Q59H94	1.9e-05		Q9UKK9	0.00017284		Q5QTS3	1.2921e-07		Q6LET3	17429		Q86VG2	0.00092		Q6IAW5	0.0032645
Q3LIF4	2.2078e-06					Q9H369	7.57e-05		Q96A33	5.4e-06					Q53FB0	3.0758e-06		Q59HH3	2e-06		Q9UMH5	0.0098916		Q5RKV6	2.2116e-07		Q6NS35	10488		Q86XP3	4.2e-06		Q6IB58	1.2208e-07
Q3MHV2	8.6468e-05					Q9H857	8.3593e-06		Q96AG4	0.072					Q53FG3	7.7713e-05		Q5BKV1	6.5e-05		Q9UNM1	2.9143e-08		Q5RLJ0	5.0324e-07		Q6NUR1	0.00037		Q86XU5	0.00095		Q6IB91	2.3788e-07
Q3MI39	3.5228e-05					Q9HAP1	0.00044579		Q96AR9	6.2e-06					Q53FG5	0.0001899		Q5CAQ4	1.3e-05		Q9UNN8	6.6485e-08		Q5SU16	0.00148		Q6NUR7	0.00042		Q86Y82	8.9e-07		Q6IBG5	9.5497e-08
Q3MIH3	0.0055235					Q9HAV7	2.2109e-05		Q96AW5	9.9e-06					Q53FI1	1.365e-07		Q5H907	0.00029		Q9UQC1	0.015741		Q5T5C7	0.011833		Q6NVC0	60401		Q8IUB0	0.00074		Q6IBH6	8.1626e-05
Q3ZCQ8	4.296e-06					Q9NPA9	0.0086692		Q96B07	0.027					Q53FK2	4.146e-07		Q5H909	0.00029		Q9Y266	1.1795e-07		Q5T8U7	3.2123e-07		Q6NVI4	4.1e-06		Q8IWP6	1071		Q6IBN0	0.00013389
Q49A78	0.0069397					Q9NPJ3	2.4693e-08		Q96BA7	0.0007					Q53FR4	0.0078415		Q5H924	3.5e-06		Q9Y2R0	5.1652e-08		Q5TCD1	2.2499e-06		Q6NVW9	18434		Q8IXH2	5.1e-07		Q6IBN1	0.0077932
Q49A90	0.010666					Q9NQ81	2.6952e-08		Q96BG6	0.00022					Q53FS6	0.028783		Q5H928	9.1e-07		Q9Y3D6	8.0468e-08		Q5TEJ7	4.6721e-07		Q6NVY0	188		Q8N0Y7	1292		Q6IBS5	0.0053791
Q49AD3	0.00052795					Q9NQT3	1.4781e-08		Q96BS4	0.067					Q53G69	1.5073e-07		Q5J908	9.5e-07		Q9Y3Z3	0.031987		Q5U0C3	1.5756e-06		Q6NWZ1	12139		Q8N1C8	0.00073		Q6IC76	0.00024551
Q49AI3	0.0029326					Q9NR30	2.9729e-08		Q96C61	3.2e-07					Q53G72	1.7831e-05		Q5JQ13	2.2e-05		Q9Y490	0.0008145		Q5U0I6	0.00023796		Q6NX68	2e-07		Q8N519	1.4e-07		Q6ICQ8	3.4618e-07
Q4KWH8	0.0033755					Q9NX63	7.4865e-06		Q96C71	2e-06					Q53G89	0.00042628		Q5JYX0	9e-08		Q9Y5M8	7.4813e-08		Q5U5J2	1.6264e-07		Q6P0M4	0.00036		Q8N5M8	27937		Q6IPW8	0.0031746
Q4LE36	0.00012859					Q9NZ87	0.0061926		Q96CF6	9.6e-06					Q53GE3	6.3425e-05		Q5M7Z5	8751		Q9Y6K5	0.0013153		Q5VU62	1.7539e-07		Q6P1L4	7.3e-06		Q8NBH6	3.3e-07		Q6LAF9	0.0035998
Q4LE60	0.00095034					Q9NZE6	0.0033085		Q96D47	3.3e-06					Q53GK6	0.00045333		Q5M7Z9	5.7e-07		R4GMQ5	1.9717e-05		Q5VXV3	9.2322e-08		Q6P1N4	0.00023		Q8NBS9	0.0001		Q6LAP8	2.7499e-07
Q4QQP8	0.0012759					Q9NZL9	9.8363e-05		Q96DB5	2.8e-06					Q53GL6	4.5108e-05		Q5NKV8	1.4e-06		R4GMX5	0.0042398		Q5ZEZ4	8.7058e-06		Q6P1N7	20395		Q8NCW5	4.1e-06		Q6LBS1	1.9499e-07
Q4TT76	0.016731					Q9P1N8	2.2969e-08		Q96FS1	0.078					Q53GN4	0.00011819		Q5QPK2	9e-08		R4GN98	5.2256e-08		Q60FE5	3.8418e-06		Q6P474	2e-07		Q8NF19	2e-07		Q6LC01	0.00026657
Q4W4Y1	0.0002605					Q9P2J5	0.00022058		Q96FW1	0.058					Q53GQ8	0.00070524		Q5QTS3	5.4e-05		S4R3N1	2.9143e-08		Q65ZQ3	4.0935e-05		Q6P996	2e-07		Q8NF91	7.4e-07		Q6LCB5	2.0703e-07
Q504U8	0.0019625					Q9TNU8	1.7829e-08		Q96GW1	3.2e-05					Q53GR7	0.001729		Q5RLJ0	5.1e-06		S4R435	7.319e-08		Q6FGD7	3.8315e-08		Q6PIN5	12139		Q8TAS6	2e-07		Q6LDX7	1.5488e-07
Q53EM5	0.00014973					Q9UBC5	5.9794e-05		Q96H53	0.03					Q53GW3	9.6666e-05		Q5SSJ5	23231		T2DQ69	1.4214e-07		Q6FGU2	3.0403e-07		Q6PJJ3	0.00081		Q8TC62	0.00073		Q6LER6	1.213e-07
Q53EY8	0.0077765					Q9UBG0	2.9729e-08		Q96HX7	0.00026					Q53GX7	4.1206e-05		Q5SX90	71655		U3KPR7	6.2625e-08		Q6FHJ9	4.8324e-07		Q6PJK6	1.9e-05		Q8TEP9	5.4e-07		Q6MZI6	3.9547e-06
Q53F60	2.3261e-07					Q9UBR2	0.000137		Q96HY6	2.6e-06					Q53GZ5	6.5524e-07		Q5T0I0	4.9e-07		U3KQ84	0.018914		Q6FHK7	1.4253e-07		Q6PJL0	9.8e-06		Q8TES4	4.3e-07		Q6NS36	0.00031667
Q53FA5	0.0092067					Q9UEH5	3.5714e-08		Q96IF9	5.5e-05					Q53H82	3.0736e-07		Q5TA01	5.4e-07		U3KQF3	8.7248e-06		Q6FHK8	2.1338e-06		Q6PJY1	50163		Q8WUI6	31318		Q6NSB3	1.4557e-07
Q53FG3	6.7475e-06					Q9UFN0	5.1173e-05		Q96KB5	0.031					Q53HA4	5.5195e-05		Q5U071	3.4e-07		U3PXP0	9.9087e-05		Q6FHK9	0.018761		Q6PJY7	5.7e-06		Q8WUM4	2e-06		Q6NTA2	9.4159e-05
Q53FG5	0.0022247					Q9UHQ9	3.2795e-05		Q96M86	4.1e-06					Q53HB3	9.9819e-06		Q5U5J2	10245		V9GYG0	6.679e-05		Q6FHP5	0.0017354		Q6PK50	0.00095		Q8WV80	3.8e-06		Q6NVC0	0.00017677
Q53FI1	0.00079675					Q9UIJ7	8.3598e-05		Q96P70	8.2e-06					Q53HB7	3.6944e-05		Q5VXV3	41774		V9GYY3	0.010389		Q6FHU3	0.006885		Q6PK56	0.00011		Q8WVM8	2e-07		Q6NVI1	1.7728e-07
Q53FN7	0.00014099					Q9UIL5	3.1323e-05		Q96QB7	0.78					Q53HH2	1.4782e-07		Q65ZQ3	46428		V9HW62	1.3763e-07		Q6FHV6	1.1289e-07		Q6PKI6	44719		Q8WY81	3e-08		Q6NVI4	0.0043948
Q53FS4	0.00018409					Q9UJZ1	6.4072e-06		Q96QK1	0.009					Q53HJ4	0.0024412		Q6DD88	48436		V9HW84	0.0065097		Q6FI37	2.6887e-06		Q6S8J3	10933		Q92520	2e-07		Q6NVW9	3.2161e-07
Q53FU3	0.01653					Q9UL31	3.2375e-08		Q96T67	0.057					Q53HQ0	2.1297e-07		Q6DRA6	1.7e-05		V9HWD6	0.00018621		Q6FI52	1.1666e-07		Q6TXQ4	74406		Q92616	3.5e-06		Q6NVY8	0.00054956
Q53FV3	0.0032165					Q9UMJ0	0.00016917		Q96TA1	0.00035					Q53HS0	0.00031202		Q6FGD7	7.2e-05		V9HWJ1	0.00028652		Q6FID4	1.4782e-07		Q6U8A4	2.8e-06		Q92799	3.3e-07		Q6NWZ1	2.9552e-05
Q53FW2	0.001071					Q9UMX5	2.427e-08		Q99529	2e-06					Q53HW7	4.4925e-05		Q6FGE5	0.00028					Q6IAW5	0.00063394		Q6UVK1	0.00025		Q92820	0.00076		Q6NXF2	9.4588e-05
Q53G69	0.00017871					Q9UMY2	0.00030612		Q99536	0.052					Q53XL8	5.2115e-05		Q6FGG2	1e-07					Q6IB91	2.3788e-07		Q6W6M8	0.00039		Q93008	4.6e-06		Q6NZ44	0.00046817
Q53G81	0.00017265					Q9UN47	0.018057		Q9BPX3	7.7e-06					Q53Z07	2.7754e-05		Q6FGH9	5.6e-06					Q6IBG5	3.0209e-06		Q71UA4	7.3e-06		Q969X5	9e-08		Q6P179	0.0012618
Q53GA0	1.9278e-07					Q9UNM1	6.9414e-06		Q9BQ02	0.86					Q53ZP9	3.6107e-07		Q6FGS1	8.2e-07					Q6IBH6	1.4782e-07		Q75MY8	0.00017		Q96A33	3e-06		Q6P1N4	0.00019955
Q53GB3	0.0042353					Q9UQM3	3.8148e-06		Q9BR63	0.028					Q549M8	5.0324e-07		Q6FGU2	4e-05					Q6IBM8	1.4782e-07		Q76LA1	8e-07		Q96AG4	1.8e-06		Q6P1N7	9.8737e-08
Q53GB9	0.012139					Q9Y2B0	5.7544e-05		Q9BS14	7e-05					Q562Z6	0.00059001		Q6FH17	7e-07					Q6IBN0	0.00048291		Q76MU0	77765		Q96AR9	2e-05		Q6P1Q5	0.00010921
Q53GE3	0.0010773					Q9Y3B8	1.3871e-05		Q9BSJ8	0.00043					Q569J8	9.0793e-05		Q6FHJ9	3.7e-06					Q6IBN1	0.00076512		Q7KYM9	77765		Q96B85	0.00012		Q6P2D7	0.0011218
Q53GG0	0.037424					Q9Y6E3	3.4697e-05		Q9BSQ6	0.16					Q58F05	1.2531e-07		Q6FHK7	6.9e-07					Q6IBQ5	7.3276e-07		Q7KYN0	0.00029		Q96BA7	73168		Q6P587	1.7539e-07
Q53GQ8	3.5422e-07					R4GN64	4.4734e-05		Q9BST8	9.9e-05					Q58F09	0.00032226		Q6FHK8	0.00034					Q6IBT3	0.013976		Q7KZ24	55549		Q96BG6	10509		Q6P6D7	1.4134e-05
Q53GR7	7.5564e-08					S4R3N1	6.9414e-06		Q9BSV4	5.6e-05					Q58F26	0.0047391		Q6FHK9	0					Q6IC76	0.0010736		Q7KZF4	0.00026		Q96G03	0.00017		Q6PIX2	0.0051183
Q53GS1	0.00038656					S4R435	2.2852e-06		Q9BSW5	0.47					Q58FF2	0.00045059		Q6FHP5	2.7e-05					Q6ICQ8	3.4618e-07		Q7L9L4	12389		Q96GX3	8.5e-06		Q6PJ43	0.0019953
Q53GX4	0.00014831					U3KQ84	6.4155e-05		Q9BUX5	5e-07					Q59E93	0.00063019		Q6FHU3	2.3e-05					Q6LAP8	1.7728e-07		Q7RU04	38924		Q96IF9	0.00036		Q6PJ72	0.00059001
Q53GX7	0.00030409					U3KQF3	0.002635		Q9BV61	3.6e-06					Q59EF6	1.365e-07		Q6FI03	9.1e-07					Q6LBS1	1.9499e-07		Q7Z3Z9	1.2e-06		Q96IR1	3.9e-07		Q6PJH4	0.00040146
Q53GY0	6.4212e-06					U3PXP0	0.00022057		Q9BVS9	4.6e-06					Q59EI9	1.3328e-07		Q6FID4	8.7e-07					Q6LC01	0.009311		Q7Z4W1	4.8e-06		Q96IS6	0.0001		Q6PJY1	0.017263
Q53GZ5	5.6456e-06					U6A216	3.8842e-05		Q9BWF4	4.1e-06					Q59EL5	0.0044098		Q6FIG4	6.3e-06					Q6LDX7	1.5488e-07		Q7Z4W8	10247		Q96KP4	0.0002		Q6PJY7	0.012842
Q53H82	0.0026276					V9GYG0	2.2788e-05		Q9BX68	0.42					Q59ES3	0.0032939		Q6FII1	7e-07					Q6LER6	0.00014178		Q7Z4X0	0.00096		Q96QB7	2e-07		Q6PK50	0.030557
Q53HA4	0.00049403					V9GZ54	0.0050338		Q9BXJ9	3.7e-06					Q59ET3	0.00014061		Q6I9V5	1.1e-06					Q6MZI6	1.4445e-06		Q7Z4Y3	5.5e-05		Q96QK1	2e-07		Q6PK56	0.0078357
Q53HH2	0.0085021					V9H1D9	0.00048308		Q9BZZ5	0.0044					Q59EV6	0.0003829		Q6IAW5	22014					Q6NS36	1.7539e-07		Q7Z5X3	9.6e-06		Q96RE1	0.00074		Q6PKD2	0.0091293
Q53HJ4	0.028608					V9HW26	0.00090298		Q9H2M9	6.9e-06					Q59EY4	5.8826e-08		Q6IAX2	4.3e-05					Q6NTA2	0.00011802		Q7Z759	10548		Q96T67	6.5e-07		Q6PKD3	2.3788e-07
Q53HJ6	0.0055235					V9HW79	0.00011021		Q9H3U1	2.4e-06					Q59F03	0.0026937		Q6IBA2	3.3e-07					Q6NVI4	1.4782e-07		Q86SX1	0.00023		Q96TA1	14199		Q6S8J3	0.0057713
Q53HP2	0.0006545					V9HW84	0.0018514		Q9H488	0.0042					Q59F25	0.00040146		Q6IBG5	0.00014					Q6NVW9	3.2161e-07		Q86TX4	0.00038		Q99523	2.7e-07		Q6U8A4	1.673e-07
Q53HS0	3.2683e-08					V9HWD6	0.045016		Q9H4N1	4.3e-06					Q59F66	0.00041929		Q6IBH6	0.00097					Q6NVY8	1.5364e-07		Q86V81	98049		Q99529	0.00086		Q6ZNL4	0.00033575
Q53HU0	0.015546					V9HWH9	1.4776e-08		Q9H4N8	0.028					Q59F68	0.014914		Q6IBM8	5.7e-05					Q6NWZ1	0.00017314		Q86VP6	0.00044		Q99536	4.2e-05		Q6ZXV5	2.9599e-07
Q53HU8	0.029857					X6RJP6	0.00088363		Q9H4N9	3.3e-06					Q59FA2	3.4178e-07		Q6IBQ5	14221					Q6NXF2	4.6489e-06		Q86X80	5e-06		Q99685	8.5e-06		Q70UQ0	6.2857e-08
Q53HW7	3.5422e-07								Q9H930	0.052					Q59FC6	0.0014013		Q6IBS5	33007					Q6NZ44	2.7496e-06		Q86X91	6e-06		Q99988	3.2e-05		Q71RH4	1.2531e-07
Q53XL8	3.5989e-08								Q9HAP0	1.7e-05					Q59FF0	0.0036044		Q6IVY5	73158					Q6P179	2.2116e-07		Q86XE2	2e-07		Q9BQ02	0.00016		Q71V33	0.00090206
Q53Z07	0.005971								Q9HAV7	0.87					Q59FG2	0.00012349		Q6LAP8	5.4e-07					Q6P1N4	4.6599e-05		Q8IUB0	0.00032		Q9BSD0	4.6e-07		Q75MY7	1.4084e-07
Q53ZP9	0.0023824								Q9HC38	5.4e-06					Q59FH0	7.8938e-05		Q6LBS1	3.8e-07					Q6P1Q5	0.0014722		Q8IWP6	62157		Q9BSE8	8.9e-07		Q7KYM9	0.015198
Q549M8	3.2845e-07								Q9NQ82	0.015					Q59G26	0.00011878		Q6LET3	6.9e-07					Q6P2D7	0.0089409		Q8IY97	6e-06		Q9BST8	0.00036		Q7L4K8	0.00053774
Q567R9	0.0047014								Q9NVA2	0.0088					Q59G75	8.214e-05		Q6LEU0	9.2e-07					Q6P587	1.7539e-07		Q8IY98	1e-06		Q9BTI9	4.6e-07		Q7L4N0	8.2701e-08
Q567U8	3.692e-07								Q9NYU2	7.1e-06					Q59GL1	8.5358e-05		Q6NTA2	16445					Q6P6D7	1.1737e-06		Q8N0Y7	19363		Q9BTV4	4.3e-07		Q7Z497	5.1396e-07
Q569J8	0.0040683								Q9NZE6	0.027					Q59GM9	1.0732e-07		Q6NUR1	5.6e-06					Q6PIX2	4.8733e-06		Q8N163	7.7e-06		Q9BUX5	11557		Q7Z4W8	3.4047e-05
Q58F05	0.001071								Q9NZM1	2.3e-06					Q59GU5	1.564e-07		Q6NUR7	0.00074					Q6PJ43	5.686e-05		Q8N1C8	13613		Q9BV28	8.4e-07		Q7Z4Y3	2.5322e-07
Q58F09	0.00027937								Q9P0M6	0.00025					Q59GW6	4.3528e-05		Q6NVC0	9e-08					Q6PJ72	0.00037806		Q8N1F7	0.00053		Q9BVC6	15379		Q7Z7J6	0.00049587
Q58FF2	0.024669								Q9P2B2	2.4e-06					Q59GX6	1.6956e-07		Q6NVI4	5.6e-06					Q6PJ76	1.673e-07		Q8N2K0	50799		Q9BVS9	6.6e-07		Q7Z7M4	2.9952e-06
Q58FF3	0.037424								Q9P2J5	2.4e-06					Q59H15	0.00030306		Q6NVV1	3.3e-05					Q6PJH4	2.6258e-07		Q8N519	42553		Q9BW34	2.3e-07		Q7Z7M5	2.0569e-06
Q58FF9	0.0026276								Q9UBG0	6.6e-06					Q59H94	0.010421		Q6NVW9	1.4e-06					Q6PJT4	0.0052052		Q8NBJ5	29434		Q9BWD1	24496		Q86TQ8	0.0016524
Q58FG1	1.0012e-05								Q9UEL2	8.2e-06					Q59HE2	1.7462e-05		Q6NVY0	7e-05					Q6PJY7	1.7539e-07		Q8NI98	15741		Q9BXP5	3.9e-06		Q86TY5	1.7539e-07
Q59E89	0.00022382								Q9UHD8	0.07					Q59HF3	6.7204e-05		Q6NX68	2.3e-07					Q6PK50	9.2648e-05		Q8TAS6	3.7e-06		Q9BXV4	1.7e-07		Q86V81	3.2453e-05
Q59E93	0.004448								Q9UHG3	1.2e-06					Q5H928	4.5041e-06		Q6P0M4	9e-07					Q6PK56	3.5388e-05		Q8TCG4	14144		Q9BXV5	6e-07		Q86VG2	0.012777
Q59EC0	0.00022716								Q9UHX1	4.6e-06					Q5J7V8	0.00066356		Q6P1L4	2.5e-06					Q6S8J3	0.00079798		Q8TD27	55175		Q9BZT2	3.8e-06		Q86XU5	0.0050668
Q59EI4	0.0019477								Q9UJZ1	0.18					Q5JP53	8.4586e-05		Q6P1N4	4.4e-05					Q6U8A4	1.673e-07		Q8WUI6	0.00088		Q9C0E8	2.7e-07		Q86Y04	2.6925e-07
Q59EL5	3.0338e-06								Q9UKM9	0.089					Q5JQ13	0.030557		Q6P2D7	27957					Q6ZNL4	5.9987e-08		Q8WUM4	0.0006		Q9H3N1	5e-06		Q8IWP6	0.002166
Q59F03	5.272e-05								Q9ULV4	0.044					Q5JRS0	0.010331		Q6P474	2.3e-07					Q70UQ0	1.0653e-07		Q8WVM8	8e-07		Q9H488	1.4e-07		Q8IXH2	0.00045851
Q59F25	5.4988e-07								Q9UMH6	0.097					Q5JRX3	0.00043028		Q6P6D7	0.0002					Q71V33	1.8454e-07		Q8WY81	2.6e-06		Q9HAP0	36439		Q8IXJ3	6.0474e-05
Q59FC6	0.02184								Q9UMS4	6.1e-06					Q5JTV8	2.9761e-07		Q6P996	2.3e-07					Q75MY7	1.6956e-07		Q8WYJ5	8.1e-06		Q9HAP1	0.00068		Q8IY98	0.00049476
Q59FD8	0.0002172								Q9UP43	8.6e-06					Q5JXB7	0.00028463		Q6PJJ3	8.8e-05					Q7L4K8	5.9745e-06		Q92542	4.3e-06		Q9HB74	6e-08		Q8N0Y7	2.2717e-05
Q59FF0	0.0018627								Q9UQ16	0.81					Q5JYX0	0.00049337		Q6PJL0	3.7e-06					Q7L4N0	0.0031201		Q92616	0.00055		Q9HBB2	0.00089		Q8N4C5	2.352e-07
Q59FH0	0.0051621								Q9Y266	0.48					Q5M7Z5	7.3305e-08		Q6PJY7	1.8e-07					Q7Z497	0.023279		Q92797	7e-07		Q9HDC9	0.0001		Q8N519	9.3898e-05
Q59FU3	2.7568e-06								Q9Y305	0.055					Q5M7Z9	4.1206e-05		Q6PK50	0.00028					Q7Z4W8	7.2129e-08		Q92799	66276		Q9NPA9	8e-05		Q8N5M8	0.00027732
Q59FV6	0.020226								Q9Y3B8	0.02					Q5QNZ2	1.673e-07		Q6PK56	0.00031					Q7Z7J6	2.8656e-05		Q92804	3367		Q9NQ81	7.7e-07		Q8NBH6	0.018142
Q59G12	4.6328e-05								Q9Y3D6	0.32					Q5QPL9	3.9414e-05		Q6PKD2	37918					Q7Z7M4	2.5429e-06		Q92820	17313		Q9NQ88	2.8e-06		Q8NBJ7	2.2001e-07
Q59G16	4.2591e-07								Q9Y3E8	5.4e-06					Q5QTS3	1.2921e-07		Q6PKI6	22344					Q7Z7M5	1.0507e-06		Q92882	62708		Q9NTK5	8.4e-07		Q8NBX0	1.4084e-07
Q59G24	0.012139								Q9Y3Z3	0.13					Q5RKV6	2.2116e-07		Q6TXQ4	3.2e-05					Q86TY5	1.7539e-07		Q92900	8.1e-06		Q9NYU2	3.6e-05		Q8NF19	1.5073e-07
Q59G26	3.1928e-06								Q9Y490	7.6e-05					Q5RLJ0	5.0324e-07		Q6U8A4	5.1e-06					Q86UY0	0.0083998		Q93020	4.2e-06		Q9NZ08	15042		Q8TAS6	0.00049786
Q59GL1	0.0014411								Q9Y570	1.7e-06					Q5SU16	0.00014014		Q6UVK1	4.6e-07					Q86V81	1.0113e-07		Q969X5	29992		Q9NZN4	1.5e-05		Q8TC62	0.0024187
Q59GU5	2.2074e-05								Q9Y617	8.9e-06					Q5T0I0	1.8136e-07		Q6W6M8	6.9e-05					Q86VG2	4.8733e-06		Q96A33	7.3e-06		Q9NZS6	0.00032		Q8TCT9	1.6956e-07
Q59GX6	2.0599e-05								Q9Y6K5	0.0028					Q5T3N1	0.00016658		Q70UQ0	23054					Q86XU5	1.9747e-05		Q96AM7	12728		Q9P0I2	8.1e-06		Q8TEP9	8.5721e-08
Q59GY3	1.1355e-05								R4GN98	0.011					Q5T5C7	5.5195e-05		Q71UA4	1.9e-06					Q86Y04	2.6925e-07		Q96AR9	6.2e-06		Q9P1A0	5.6e-06		Q8TES4	0.00013426
Q59H15	0.023734								S4R3G0	0.16					Q5TBR1	3.0859e-05		Q71UA6	9.6e-06					Q8IV28	2.9761e-07		Q96AW5	9.9e-06		Q9P1N1	10031		Q8WUM0	6.4083e-06
Q59H94	0.0005964								T2DQ69	2.8e-06					Q5TCD1	0.00044432		Q71V07	16219					Q8IXH2	0.0023401		Q96B07	45796		Q9P2B2	2.5e-06		Q8WUM4	3.3392e-07
Q59HE2	0.00044775								U5Y1J8	0.052					Q5TEJ7	0.00033341		Q75MY8	22962					Q8IXJ3	2.7985e-07		Q96BA7	12089		Q9P2E9	3.4e-06		Q8WUQ0	4.9766e-08
Q59HH3	4.7822e-07								V5NQU4	0.78					Q5U0C3	1.0055e-05		Q76LA1	5.4e-07					Q8IY98	0.00011282		Q96BG6	0.0001		Q9UBG0	45796		Q8WV80	1.7539e-07
Q5BKV1	1.0106e-05								V9H0D5	0.00026					Q5U0I6	6.1581e-07		Q76MU0	56849					Q8N0Y7	4.8716e-08		Q96C19	10247		Q9UBQ7	5.4e-07		Q8WVM8	2.352e-07
Q5CAQ4	6.6611e-07								V9HW90	0.19					Q5U5J2	8.9517e-08		Q7KYN0	9e-08					Q8N519	0.00090772		Q96C61	0.00018		Q9UG59	2219		Q8WY81	0.030557
Q5H907	1.0042e-06								W8QEH3	0.0097					Q5VSQ6	1.1625e-07		Q7KZ24	88415					Q8N5K1	3.6322e-07		Q96C71	5.4e-06		Q9UHA4	5.3e-06		Q92799	0.0055869
Q5H909	1.0042e-06								X5D2J9	4.1e-06					Q5VU62	6.8216e-05		Q7KZF4	2.5e-05					Q8N5M8	0.0010427		Q96CF6	9.6e-06		Q9UIJ7	5.6e-06		Q92820	0.0020825
Q5H924	5.11e-07								X5D945	0.079					Q5VYK3	2.5322e-07		Q7L4N0	0.00066					Q8NBH6	1.5608e-05		Q96CS3	5e-07		Q9UIQ6	6.2e-06		Q92841	0.00026288
Q5H928	0.022082														Q5ZEZ4	0.0010051		Q7L9L4	8.4e-07					Q8NBX0	1.3248e-07		Q96D47	4.1e-06		Q9UKK9	5e-08		Q92896	3.522e-07
Q5J7V8	1.5873e-07														Q65ZQ3	0.00017914		Q7RU04	71867					Q8NF19	1.6264e-07		Q96DB5	5.4e-06		Q9UMH5	4e-08		Q93020	0.025057
Q5J908	1.9564e-07														Q69EZ8	8.8201e-08		Q7Z3Z9	7e-07					Q8TAS6	1.1289e-07		Q96FS1	0.00034		Q9UMY3	22092		Q969X5	2.5936e-05
Q5JQ13	1.6082e-05														Q6DC98	0.00013604		Q7Z4W1	0.00055					Q8TBR3	7.3276e-07		Q96FW1	18298		Q9UN47	0.00039		Q96A33	1.7728e-07
Q5JX45	0.0019477														Q6FGD7	3.8315e-08		Q7Z4W8	4e-06					Q8TC62	0.0086883		Q96GW1	0.00018		Q9UNM1	1.7e-07		Q96AG4	0.00059001
Q5JYX0	0.023079														Q6FGU2	3.0403e-07		Q7Z4X0	16336					Q8TEP9	1.0054e-07		Q96H31	77144		Q9UNM7	5.1e-07		Q96AR9	0.00053813
Q5M7Z5	2.889e-07														Q6FHF5	0.00017835		Q7Z4Y3	9.5e-07					Q8TES4	3.1328e-06		Q96H53	252		Q9UQC1	0.00089		Q96AW5	0.0010556
Q5M7Z9	0.00030409														Q6FHJ9	4.8324e-07		Q7Z4Z1	2.3e-07					Q8WUI6	1.673e-07		Q96HX7	0.0001		Q9UQV0	8e-07		Q96B85	0.00064469
Q5NKV8	0.0058962														Q6FHK7	1.4253e-07		Q86SE5	97641					Q8WUM0	1.1472e-05		Q96HY6	1.7e-06		Q9Y2R0	4.3e-06		Q96BG6	0.0014381
Q5QPK2	0.0020619														Q6FHK8	4.0432e-06		Q86SW4	7866					Q8WUM4	3.3392e-07		Q96IF9	0.00088		Q9Y3D6	2e-07		Q96DG6	4.6379e-08
Q5QTQ6	0.00034165														Q6FHK9	1.4253e-07		Q86SX1	6e-05					Q8WUQ0	1.1928e-07		Q96M27	1.2e-06		Q9Y3Z3	0.0009		Q96GE4	1.0653e-07
Q5QTS3	0.012837														Q6FHP5	1.1301e-05		Q86TQ8	33007					Q8WUW7	0.0051943		Q96P70	0.00087		Q9Y490	0.00086		Q96GX3	0.0088414
Q5RLJ0	3.2845e-07														Q6FHU3	2.3788e-07		Q86TX4	5.9e-05					Q8WV80	1.7539e-07		Q96QB7	52765		Q9Y5M8	8.7e-06		Q96H31	0.0043949
Q5SSJ5	8.191e-05														Q6FHV6	0.023557		Q86UY0	33007					Q8WY81	8.777e-08		Q96QK1	0.00035		Q9Y6E3	1144		Q96IF9	0.0092878
Q5SX86	4.7182e-05														Q6FHX6	0.00022532		Q86V81	9.5e-05					Q8WYJ5	9.7798e-06		Q96RE1	0.00032		Q9Y6K5	7.1e-06		Q96IR1	1.0079e-05
Q5SX87	5.5898e-05														Q6FI37	0.001389		Q86VP6	9.8e-05					Q92799	0.00018599		Q96T67	31488		R4GMQ5	22089		Q96MR6	0.03121
Q5SX90	1.4456e-07														Q6FI52	1.1666e-07		Q86X80	9.5e-06					Q92841	9.8021e-05		Q96TA1	0.00079		R4GMX5	7.2e-05		Q96QB7	0.00011155
Q5SX91	5.5695e-05														Q6FID4	1.4782e-07		Q86X91	1.9e-06					Q92896	6.5444e-07		Q99529	0.00053		R4GN98	3.5e-06		Q96T67	1.0054e-07
Q5T0I0	0.0012967														Q6I9V5	1.3328e-07		Q86XE2	2.3e-07					Q93020	1.3328e-07		Q9BPX3	1.3e-05		S4R3N1	5e-08		Q99439	5.9071e-07
Q5T5C7	0.00049403														Q6IAW5	0.00040959		Q8IWP6	1612					Q969X5	6.4229e-05		Q9BR63	52765		S4R435	1.7e-07		Q99460	0.00035795
Q5T765	2.3744e-07														Q6IB58	1.2531e-07		Q8IY97	1.9e-06					Q96AG4	0.0023966		Q9BS14	6e-05		T2DQ69	4.2e-06		Q99523	1.6956e-07
Q5TA01	4.4105e-05														Q6IB91	0.00010191		Q8IY98	2.9e-05					Q96AR9	1.797e-05		Q9BSE8	20848		U3KPR7	4.2e-06		Q99529	0.0022227
Q5TBR0	0.00011814														Q6IBG5	9.5497e-08		Q8IZP2	0.00059					Q96AW5	2.0706e-07		Q9BSJ8	0.00032		U3KQ84	0.0006		Q99988	0.012846
Q5U071	5.4318e-06														Q6IBH6	4.0935e-05		Q8N0Y7	0.00072					Q96B07	0.010245		Q9BST8	2e-06		U3KQF3	25543		Q9BQ02	2.9694e-06
Q5U5J2	0.0021412														Q6IBM8	0.00017409		Q8N163	3.5e-06					Q96B85	0.00047526		Q9BSV4	7.7e-05		U3PXP0	6.8e-07		Q9BQG0	5.7868e-07
Q5VTE0	0.00082511														Q6IBN0	6.109e-05		Q8N1F7	1.1e-06					Q96BA7	0.0012618		Q9BTI9	94967		V9GYY3	5.2e-07		Q9BR63	0.015158
Q5VU62	0.0024059														Q6IBN1	7.2982e-05		Q8N5K1	2.3e-07					Q96BG6	2.7634e-05		Q9BUS0	63647		V9GZ37	0.00052		Q9BS26	0.0013055
Q65ZQ3	0.013959														Q6IBS5	8.8716e-05		Q8NBS9	33007					Q96C71	1.3328e-07		Q9BUX5	4.8e-06		V9HVU7	1.4e-07		Q9BSD0	0.0001074
Q6DC98	0.0012884														Q6IBT3	0.00027001		Q8NFH3	3e-07					Q96DG6	4.6379e-08		Q9BV61	9.7e-05		V9HW62	2e-07		Q9BSE8	2.5215e-05
Q6DD88	0.0017307														Q6IC76	0.00017544		Q8NG23	1.9e-06					Q96E39	0.00060367		Q9BVS9	0.00012		V9HW84	0.00049		Q9BSQ6	0.00075428
Q6DRA6	0.010004														Q6ICQ8	3.4618e-07		Q8TAS6	9e-07					Q96GX3	4.4022e-07		Q9BWF4	0.00053		V9HWD6	26751		Q9BST8	0.0020374
Q6FG59	1.7909e-05														Q6IPW8	0.00014096		Q8TBR3	14221					Q96H31	5.3552e-05		Q9BX68	26721		V9HWE1	0.00014		Q9BSW5	1.2545e-07
Q6FGD7	0.00015762														Q6LC01	0.00013131		Q8TD27	4e-07					Q96IF9	1.5076e-05		Q9BXJ9	0.00041		V9HWJ1	3.9e-06		Q9BTI9	5.7616e-05
Q6FGE5	0.010247														Q6LCB5	1.4557e-07		Q8WUI6	1.8e-07					Q96IR1	4.5766e-05		Q9BZ93	17193					Q9BTV4	9.249e-08
Q6FGG2	0.0087533														Q6LDX7	7.3247e-05		Q8WUM4	8.7e-07					Q96IS6	0.0066584		Q9H2M9	6.9e-06					Q9BUM6	2.0706e-07
Q6FGH9	0.0018777														Q6LER6	1.213e-07		Q8WY81	4.7e-06					Q96MR6	6.1437e-08		Q9H3N1	29434					Q9BUV4	0.0007627
Q6FGS1	1.9278e-07														Q6MZI6	5.0545e-06		Q8WYJ5	2.9e-06					Q96QB7	7.7577e-06		Q9H3U1	2.4e-06					Q9BUX5	1.4084e-07
Q6FGU2	0.0014211														Q6NS36	9.4204e-06		Q92542	1.1e-06					Q96S52	2.2001e-07		Q9H488	36439					Q9BV28	1.0653e-07
Q6FH17	0.00056538														Q6NTA2	0.0014659		Q92616	1.6e-06					Q96T67	1.4557e-07		Q9H4N1	0.00059					Q9BVS9	0.00071356
Q6FHF5	1.0833e-05														Q6NVC0	9.4461e-06		Q92797	4.1e-06					Q96TA1	0.0030841		Q9H4N9	0.00024					Q9BWF4	0.0023054
Q6FHJ9	0.035432														Q6NVI1	2.7499e-07		Q92799	19779					Q99439	5.9071e-07		Q9H930	5e-07					Q9BXP5	2.5322e-07
Q6FHK7	0.021051														Q6NVI4	0.0021889		Q92882	5.6e-06					Q99460	0.0020094		Q9HAP0	0.00029					Q9BXV4	1.53e-05
Q6FHK8	0.00076105														Q6NVW9	3.2161e-07		Q92900	2.9e-06					Q99529	6.4012e-06		Q9HC38	4.1e-06					Q9BXV5	3.9394e-05
Q6FHK9	0.00026657														Q6NWZ1	0.00017314		Q93020	9.4e-07					Q99720	2.6733e-07		Q9NQ81	15819					Q9BZ93	0.00015191
Q6FHP5	0.0077765														Q6NXF2	0.0026767		Q969X5	16643					Q99988	4.9874e-05		Q9NQG5	2e-06					Q9BZU1	1.3328e-07
Q6FHU3	0.0008145														Q6NZ44	1.1512e-05		Q96A33	2.2e-06					Q9BQ02	5.1523e-06		Q9NXZ8	1071					Q9H3A5	0.0010556
Q6FHV6	3.581e-05														Q6P179	0.00031202		Q96AM7	5.8e-05					Q9BR63	1.9499e-07		Q9NYU2	8e-05					Q9H488	0.0024773
Q6FHX6	0.0004292														Q6P1L4	1.9579e-07		Q96AR9	4.1e-07					Q9BSD0	0.0058396		Q9NZE6	45796					Q9H857	0.00076459
Q6FI03	3.5422e-07														Q6P1N4	0.0053638		Q96AW5	9e-08					Q9BSE8	0.0019649		Q9NZL4	6.9e-06					Q9HAP1	0.0042853
Q6FII1	0.019917														Q6P1Q5	5.9071e-07		Q96BA7	0.00047					Q9BSQ6	2.7066e-07		Q9NZM1	0.00093					Q9HAV7	1.601e-07
Q6IAW5	0.00016529														Q6P2D7	0.00024988		Q96BG6	5.8e-05					Q9BST8	3.3169e-06		Q9P0M6	82511					Q9NPA9	0.0016297
Q6IAX2	0.00062157														Q6P587	1.7539e-07		Q96C19	8.6e-06					Q9BSW5	8.0778e-05		Q9P2B2	2.4e-06					Q9NQ81	0.029186
Q6IAX6	2.8558e-05														Q6P6D7	6.5986e-06		Q96C61	2.6e-05					Q9BTI9	0.0016977		Q9P2J5	2.4e-06					Q9NQ88	2.2116e-07
Q6IBA2	0.012139														Q6PIX2	0.00043328		Q96C71	9.4e-07					Q9BTV4	1.1511e-07		Q9UBG0	6.6e-06					Q9NR31	1.4782e-07
Q6IBG5	0.0021973														Q6PJ43	0.00032339		Q96CF6	9.5e-07					Q9BUM6	2.0706e-07		Q9UBQ7	5072					Q9NUJ1	2.2116e-07
Q6IBH6	0.00072909														Q6PJ72	0.0007627		Q96FS1	2.5e-06					Q9BUV4	0.00022136		Q9UEL2	8.2e-06					Q9NX63	1.1751e-05
Q6IBM8	0.0017827														Q6PJ76	0.00020021		Q96FW1	11991					Q9BUX5	2.352e-07		Q9UHA4	11449					Q9NZE6	0.0018621
Q6IBN0	0.02726														Q6PJH4	2.6258e-07		Q96GW1	3.9e-05					Q9BV28	2.2001e-07		Q9UHG3	1.2e-06					Q9NZN4	1.9579e-07
Q6IBN1	0.00040138														Q6PJJ3	4.2098e-07		Q96GX3	3.7e-06					Q9BV61	8.4964e-05		Q9UJ70	35326					Q9P1G4	1.9499e-07
Q6IBQ5	2.9463e-05														Q6PJT4	0.00015378		Q96H31	0.00099					Q9BVS9	1.4782e-07		Q9UJZ1	61286					Q9P1N9	0.0012618
Q6IBR2	0.00049403														Q6PJY1	0.00015217		Q96HX7	8.9e-05					Q9BVU3	2.2001e-07		Q9UL31	27937					Q9P2B2	2.6728e-07
Q6IBS5	0.0088989														Q6PJY7	0.00071346		Q96HY6	8.5e-06					Q9BWF4	2.5804e-07		Q9ULV4	6377					Q9P2J5	0.00090791
Q6IBT3	0.0013104														Q6PK50	0.0016297		Q96IF9	4.7e-05					Q9BXV4	6.5257e-08		Q9UMH5	1316					Q9TNU8	9.8737e-08
Q6IC76	0.001071														Q6PK56	0.0014013		Q96IR1	5e-05					Q9BXV5	1.673e-07		Q9UMS4	31199					Q9UBC5	0.013471
Q6IVY5	2.1959e-07														Q6PKD2	5.3243e-05		Q96KP4	21518					Q9BZ93	8.777e-08		Q9UN47	17265					Q9UBG0	4.276e-07
Q6LAP8	0.012139														Q6S8J3	8.2462e-05		Q96M27	1.6e-06					Q9BZU1	1.3328e-07		Q9UNM1	67675					Q9UBQ7	1.6956e-07
Q6LBS1	0.024669														Q6U8A4	0.00059001		Q96M86	6.5e-06					Q9H369	0.0017953		Q9UQ16	0.0004					Q9UE89	0.014748
Q6LC01	0.00016483														Q6URC4	2.2001e-07		Q96P70	3.8e-05					Q9H3A5	2.0706e-07		Q9Y305	39149					Q9UFN0	1.8454e-07
Q6LDX7	0.0024059														Q6ZNL4	0.00069022		Q96QB7	9.4e-05					Q9H3N1	0.00010838		Q9Y3B8	15741					Q9UHQ9	0.00019594
Q6LET3	0.00020918														Q71RH4	8.6936e-08		Q96QK1	10029					Q9H488	0.0067023		Q9Y3D6	0.00083					Q9UHS8	2.1728e-05
Q6NS35	1.523e-06														Q71UA4	1.8596e-07		Q96T67	50739					Q9H857	0.009154		Q9Y3E8	4.1e-06					Q9UIJ7	6.3679e-06
Q6NSF2	0.0029326														Q71V33	0.00022856		Q96TA1	16628					Q9HAP1	1.4323e-05		Q9Y3I0	36797					Q9UIL5	0.0012618
Q6NTA2	0.00025883														Q75MY7	1.7728e-07		Q99529	1.7e-05					Q9HAV7	1.601e-07		Q9Y3Z3	1602					Q9UIQ6	1.8596e-07
Q6NUR1	0.00014705														Q7KYM9	0.00034699		Q99720	4.6e-06					Q9NPA9	0.0032939		Q9Y490	9e-05					Q9UJZ1	2.3434e-06
Q6NUR7	0.00026275														Q7L4K8	8.5032e-05		Q9BPX3	7.2e-06					Q9NQ81	3.0139e-05		Q9Y570	19363					Q9ULV4	1.4901e-07
Q6NVI4	0.0033755														Q7L4N0	8.2701e-08		Q9BS14	1e-05					Q9NQ88	2.2116e-07		Q9Y5B9	5.4e-06					Q9UMH5	0.0183
Q6NVV1	0.0012967														Q7Z497	1.1374e-05		Q9BS26	0.00072					Q9NR31	1.4782e-07		Q9Y617	11254					Q9UMJ0	0.0020959
Q6NVY0	0.00014053														Q7Z4W8	2.8001e-05		Q9BSD0	30438					Q9NUJ1	2.2116e-07		Q9Y6C9	17757					Q9UMY2	0.00020065
Q6NWZ1	0.0062708														Q7Z4Y3	2.0703e-07		Q9BSE8	8.5e-05					Q9NX63	5.3818e-05		Q9Y6E3	23079					Q9UNM1	0.00018746
Q6NX68	0.001071														Q7Z759	0.0001899		Q9BSJ8	1.9e-05					Q9NYD7	3.0646e-07		Q9Y6K5	39568					Q9UQ16	4.4157e-07
Q6NZI2	0.0088458														Q7Z7J6	0.0011862		Q9BSQ6	0.00038					Q9NZ87	6.4854e-05		R4GN98	54854					Q9UQM3	4.5912e-05
Q6P0M4	0.00010072														Q7Z7M4	1.819e-05		Q9BST8	3.9e-05					Q9NZE6	0.0088415		S4R3N1	34456					Q9UQV0	0.0002473
Q6P1L4	0.00087408														Q7Z7M5	7.7008e-06		Q9BSV4	3.1e-05					Q9P1G4	1.9499e-07		S4R435	36439					Q9Y266	1.564e-07
Q6P1N4	5.1866e-05														Q86TQ8	5.0608e-05		Q9BSW5	0.00039					Q9P1N9	1.9499e-07		T2DQ69	2.8e-06					Q9Y2B0	3.9959e-05
Q6P1N7	1.1166e-07														Q86TY5	1.7539e-07		Q9BTI9	96652					Q9P2J5	1.2833e-07		U5Y1J8	5e-07					Q9Y3I0	0.00059001
Q6P1Q5	0.017757														Q86UY0	0.00023107		Q9BTV4	1898					Q9TNU8	1.8596e-07		V5NQU4	49403					Q9Y3Z3	0.00079299
Q6P2D7	0.0004242														Q86V81	6.5164e-05		Q9BUS0	28436					Q9UBC5	2.1056e-07		V9H0D5	8.8e-06					Q9Y490	0.0014819
Q6P474	2.0174e-07														Q86VG2	0.00043328		Q9BUX5	5.4e-06					Q9UBR2	9.9152e-08		W8QEH3	28845					Q9Y4L1	0.0010311
Q6P6D7	8.9283e-06														Q86XU5	0.00057224		Q9BV61	1.3e-05					Q9UE89	0.0019095		X5D2J9	2e-05					Q9Y5M8	3.179e-07
Q6P996	2.0174e-07														Q8IUB0	0.00059001		Q9BVS9	6.6e-07					Q9UFN0	1.8454e-07		X5D7P1	25443					Q9Y6C2	0.00041334
Q6P9B6	2.2371e-07														Q8IV28	0.00013559		Q9BWF4	5.6e-06					Q9UHQ9	0.033236		X5D945	54354					Q9Y6E3	0.00015091
Q6PIN5	0.00012053														Q8IWP6	0.0003721		Q9BWY6	2e-07					Q9UHS8	0.0003258								R4GN64	3.6516e-06
Q6PJ43	6.2462e-05														Q8IXH2	2.7558e-05		Q9BX68	9e-07					Q9UIJ7	7.9396e-08								S4R3N1	0.0031641
Q6PJJ3	0.00023984														Q8IY97	1.8596e-07		Q9BXJ9	9e-07					Q9UIL5	5.6476e-05								S4R435	1.9499e-07
Q6PJL0	0.0045796														Q8IY98	3.0757e-07		Q9BZ93	8.4e-07					Q9UJZ1	7.6392e-06								U3KQ84	2.4017e-05
Q6PJT4	8.8183e-05														Q8N0Y7	4.8716e-08		Q9H2M9	7e-06					Q9ULV4	8.8273e-05								U3KQF3	5.3015e-05
Q6PJY1	0.00026491														Q8N519	6.8708e-05		Q9H2R8	6e-06					Q9UMH5	0.00016731								U3PXP0	0.023279
Q6PJY7	0.0089576														Q8N5M8	0.00027732		Q9H3N1	7202					Q9UMJ0	8.0871e-05								V9GYG0	0.0012264
Q6PK50	0.0014643														Q8NBH6	0.00059001		Q9H3U1	8.8e-06					Q9UMY2	0.001003								V9H1D9	0.023279
Q6PK56	0.001071														Q8TAS6	0.0015619		Q9H488	43028					Q9UN47	0.00088556								V9HW26	0.00010201
Q6PKD2	0.0039468														Q8TC62	6.4229e-05		Q9H4N1	5.5e-07					Q9UNM1	0.00031667								V9HW62	6.7229e-07
Q6PKI6	0.0017376														Q8TEP9	2.0703e-07		Q9H4N8	0.00069					Q9UQM3	0.00065173								V9HW79	0.00032045
Q6QE17	0.001199														Q8TES4	0.0050582		Q9H4N9	7e-07					Q9Y2B0	2.0517e-05								V9HW84	0.019243
Q6S8J3	0.0013259														Q8WUI6	0.0013199		Q9HAP0	6.7e-05					Q9Y3B8	2.9452e-07								V9HWD6	0.00050132
Q6TXQ4	0.0077765														Q8WUM0	7.772e-07		Q9HAV7	6.3e-06					Q9Y3I0	2.6279e-05								V9HWH9	3.6322e-07
Q6U7G8	2.2371e-07														Q8WUM4	0.00026587		Q9HB74	7.3e-07					Q9Y490	2.9415e-05								V9HWJ1	2.2116e-07
Q6U8A4	0.0042553														Q8WUQ0	2.8869e-08		Q9MY34	73158					Q9Y4L1	2.1093e-06								W5X314	0.00014199
Q6W6M8	0.00070391														Q8WUW7	0.00012417		Q9NQ39	4.6e-05					Q9Y5M8	3.179e-07								X6RJP6	4.4535e-06
Q6ZVI6	5.6887e-06														Q8WV80	1.7539e-07		Q9NQ81	81255					Q9Y6C2	2.2116e-07
Q70UQ0	0.0040683														Q8WVM8	1.365e-07		Q9NR31	8.7e-07					Q9Y6E3	0.00081768
Q71RH4	0.000172														Q8WY81	0.0020214		Q9NVA2	69699					R4GN64	5.7119e-06
Q71V07	0.00178														Q8WYJ5	0.00026166		Q9NXZ8	10991					S4R328	7.4194e-05
Q76LA1	2.0839e-07														Q92799	0.00045851		Q9NYU2	2.6e-05					S4R3N1	0.00024338
Q76MU0	0.00014099														Q92820	0.00047769		Q9NZL4	2.2e-06					S4R435	1.9499e-07
Q7KYM9	0.0007067														Q92841	2.2645e-05		Q9NZM1	20953					U3KQ84	0.00010681
Q7KYN0	0.0011843														Q92896	2.7742e-07		Q9P0M6	35928					U3KQF3	2.881e-06
Q7KZ24	0.0011801														Q92900	1.6264e-07		Q9P2B2	8.8e-06					U3PXP0	8.0456e-08
Q7KZF4	0.0018627														Q93020	0.00018278		Q9P2J5	2e-07					U6A216	3.2007e-05
Q7L4N0	0.0066653														Q969X5	6.4229e-05		Q9UBG0	2.2e-06					V9GZ54	0.0086459
Q7L9L4	0.012389														Q96AG4	2.5746e-05		Q9UBQ7	8751					V9H1D9	8.0456e-08
Q7RU04	8.2463e-05														Q96AR9	0.0030501		Q9UEL2	3.4e-07					V9HW26	0.0022782
Q7Z3Z9	0.00093025														Q96AW5	0.00047584		Q9UFN0	4.6e-06					V9HW79	0.0013349
Q7Z4W1	2.4796e-07														Q96B07	0.00059001		Q9UHA4	3.2e-06					V9HW84	0.0012968
Q7Z4W8	0.0020175														Q96B85	0.0001147		Q9UHG3	1.3e-06					V9HWD6	0.00040374
Q7Z4X0	4.5019e-07														Q96BA7	0.00011819		Q9UIJ7	2e-07					V9HWJ1	2.2116e-07
Q7Z4Y3	0.0017827														Q96BG6	0.00029354		Q9UJ70	1119					W5X314	0.015845
Q7Z4Z1	0.0055235														Q96BS4	4.0048e-05		Q9UKM9	68668					X6RJP6	5.5794e-08
Q7Z5X3	5.11e-07														Q96C71	0.00059001		Q9UL31	1.1e-06
Q7Z759	0.0018777														Q96DG6	6.8216e-05		Q9ULV4	12946
Q7Z7J6	0.010247														Q96E39	0.00032448		Q9UNM1	0.00019
Q86SX1	0.00041709														Q96GX3	4.4022e-07		Q9UNN8	12408
Q86TQ8	0.0088989														Q96H31	0.0023054		Q9UQ16	13212
Q86TX4	2.2687e-06														Q96IF9	0.00017231		Q9Y266	25569
Q86U75	6.0106e-05														Q96IR1	4.5057e-06		Q9Y2B0	1.1e-06
Q86V81	0.0033755														Q96IS6	0.00053391		Q9Y305	11114
Q86VP6	0.00020187														Q96MR6	6.1437e-08		Q9Y3B8	1.1e-06
Q86XE2	2.0174e-07														Q96QB7	0.018076		Q9Y3D6	3.7e-06
Q8IUB0	0.00055249														Q96RE1	0.00059001		Q9Y3I0	15891
Q8IWP6	0.0012112														Q96TA1	3.7547e-05		Q9Y490	1.8e-05
Q8IXH2	0.0035071														Q99439	5.9071e-07		Q9Y570	37231
Q8IY97	0.00012974														Q99460	4.7078e-05		Q9Y617	3.2e-06
Q8IY98	2.1195e-05														Q99529	0.00091445		Q9Y6C9	9.7e-07
Q8IZP2	0.0076832														Q99720	2.6733e-07		Q9Y6K5	12768
Q8N0Y7	0.0030274														Q99988	0.00027024		R4GN98	0.0003
Q8N163	0.0038269														Q9BQ02	6.5705e-05		S4R3G0	23629
Q8N1F7	5.4715e-06														Q9BR63	4.4106e-05		S4R3N1	7.7e-07
Q8N519	0.0024059														Q9BS26	0.00026527		S4R435	3.6e-05
Q8N5K1	0.0055235														Q9BSD0	4.3207e-05		T2DQ69	5.1e-06
Q8N5M8	0.00030524														Q9BSE8	9.9069e-06		V5NQU4	11866
Q8NBJ5	0.0006377														Q9BSQ6	2.7066e-07		V9H0D5	7.8e-06
Q8NG23	2.5983e-07														Q9BST8	0.00026836		V9HVU7	12618
Q8NHW5	0.00078188														Q9BSW5	1.2545e-07		V9HW62	5.6e-06
Q8NI98	1.5407e-07														Q9BTI9	3.8766e-05		X5D2J9	5.6e-06
Q8TAS6	0.0036317														Q9BTV4	2.0736e-07		X5D7P1	7e-05
Q8TBR3	2.9463e-05														Q9BUM6	2.0706e-07		X5D945	1.1e-06
Q8TC62	0.0018777														Q9BUV4	0.00059001
Q8TCG4	3.5759e-05														Q9BUX5	1.4084e-07
Q8TD27	5.3035e-08														Q9BVS9	6.8216e-05
Q8WUI6	0.00089719														Q9BWF4	0.00080558
Q8WUM4	0.0002605														Q9BXJ9	1.365e-07
Q8WVM8	0.0086755														Q9BXP5	2.0703e-07
Q8WY81	0.0027979														Q9BXV4	6.49e-06
Q92526	0.0011934														Q9BXV5	3.9394e-05
Q92542	0.0067941														Q9BZ93	0.00032069
Q92616	8.3293e-05														Q9BZU1	5.3181e-05
Q92797	0.00011916														Q9H2R8	1.2876e-07
Q92799	1.3351e-07														Q9H2U2	1.2208e-07
Q92804	1.727e-05														Q9H369	7.6249e-05
Q92820	0.012597														Q9H3A5	0.00047584
Q92882	3.4071e-07														Q9H3N1	1.601e-07
Q92900	0.001071														Q9H488	6.53e-05
Q93020	2.0499e-07														Q9H857	6.2694e-05
Q93084	3.859e-07														Q9HAP1	0.0014288
Q969X5	0.00060423														Q9HAV7	1.601e-07
Q96A33	6.0738e-07														Q9HB74	6.2571e-05
Q96AG4	0.00036439														Q9NPA9	0.0012147
Q96AM7	0.0021919														Q9NPJ3	1.5457e-07
Q96AR9	0.014297														Q9NQ81	0.0017695
Q96AW5	0.00034681														Q9NQ88	2.2116e-07
Q96B07	0.00028236														Q9NR30	2.0703e-07
Q96BA7	0.0025309														Q9NR31	1.4782e-07
Q96BG6	0.00030409														Q9NUJ1	2.2116e-07
Q96BS4	0.014033														Q9NX63	9.4463e-05
Q96C19	4.0467e-07														Q9NZ87	0.0017963
Q96C61	3.6352e-05														Q9NZE6	0.00047652
Q96C71	2.0499e-07														Q9NZL9	0.002731
Q96CF6	0.00040138														Q9P1G4	1.9499e-07
Q96CS3	7.3629e-07														Q9P1N9	0.00010921
Q96D47	2.7334e-07														Q9P2B2	2.7784e-07
Q96FS1	0.0048505														Q9P2J5	0.0021567
Q96FW1	0.00083597														Q9UBC5	0.00013218
Q96GX3	0.013613														Q9UBG0	1.2208e-07
Q96H31	0.0055235														Q9UBQ7	7.3305e-08
Q96H53	5.3063e-06														Q9UBR2	0.0012849
Q96HE7	0.0045796														Q9UE89	0.00023393
Q96HX7	0.0011744														Q9UEL2	9.2322e-08
Q96IF9	0.0002172														Q9UFN0	0.00027031
Q96IR1	0.0013956														Q9UHQ9	3.1477e-05
Q96KB5	0.00016785														Q9UHS8	4.4925e-05
Q96KP4	0.0042553														Q9UIJ7	1.4159e-05
Q96M27	3.1185e-06														Q9UIL5	0.0014013
Q96P70	8.5159e-05														Q9UIQ6	2.352e-07
Q96QB7	0.001071														Q9UJZ1	2.632e-05
Q96QK1	5.0719e-05														Q9UKK9	1.1111e-07
Q96RE1	0.00093664														Q9ULV4	0.00015378
Q96T67	0.0096382														Q9UMH5	0.00053939
Q96TA1	0.0006408														Q9UMJ0	0.0007592
Q99529	0.00026813														Q9UMY2	0.00023407
Q99536	0.00022445														Q9UN47	6.4229e-05
Q99961	0.0016857														Q9UNM1	0.00011155
Q9BPX3	4.7294e-06														Q9UQ16	1.6264e-07
Q9BQ02	0.0055235														Q9UQM3	1.6416e-05
Q9BR63	0.0013788														Q9UQV0	0.00010047
Q9BS14	0.0016753														Q9Y266	9.702e-08
Q9BS26	0.0082556														Q9Y2B0	4.1598e-05
Q9BSD0	0.0083848														Q9Y3B8	2.9452e-07
Q9BSE8	0.0019625														Q9Y3I0	0.00016925
Q9BSJ8	0.00015865														Q9Y3Z3	0.00035768
Q9BSQ6	0.00075559														Q9Y490	0.00034606
Q9BST8	4.278e-05														Q9Y4L1	0.00035138
Q9BSV4	0.0031162														Q9Y5M8	3.179e-07
Q9BSW5	0.00095944														Q9Y6C2	2.2116e-07
Q9BTI9	0.00014443														Q9Y6E3	1.9015e-05
Q9BTV4	0.017343														Q9Y6K5	2.5322e-07
Q9BUS0	0.00019837														R4GN64	3.6532e-05
Q9BUV4	0.0026945														S4R328	0.0248
Q9BUX5	5.4988e-07														S4R3N1	0.00054172
Q9BV61	7.4215e-05														S4R435	1.9499e-07
Q9BVS9	0.001071														U3KQ84	0.00015588
Q9BW34	0.00028424														U3KQF3	1.3627e-05
Q9BWY6	0.001071														U3PXP0	8.0456e-08
Q9BX68	3.7867e-05														U6A216	1.0322e-07
Q9BXJ9	0.0012669														V9GYG0	5.5502e-06
Q9BZ93	0.014452														V9GZ54	0.00020639
Q9BZZ5	0.00066485														V9H1D9	8.0456e-08
Q9H2M9	3.692e-07														V9HW26	0.00010876
Q9H2R8	7.4493e-07														V9HW79	0.00026106
Q9H3N1	0.0042553														V9HW84	0.0014459
Q9H3U1	6.2413e-07														V9HWJ1	0.0001899
Q9H488	9.2526e-05														W5X314	0.00013624
Q9H4N8	0.00017914														X6RJP6	5.5794e-08
Q9H4N9	0.0020783
Q9H930	0.00054354
Q9HAP0	0.00065275
Q9HB74	3.13e-05
Q9MY34	2.1959e-07
Q9NPA9	0.0058428
Q9NQ39	3.3809e-05
Q9NQ81	0.010247
Q9NQ82	0.00022864
Q9NQG5	3.2845e-07
Q9NTK5	3.2182e-05
Q9NVA2	2.6658e-05
Q9NXZ8	2.1195e-07
Q9NYU2	0.001071
Q9NZE6	0.00028236
Q9NZL9	0.00010906
Q9NZM1	0.00022864
Q9P0M6	0.0011692
Q9P2B2	0.0012759
Q9P2J5	0.0004351
Q9UBQ7	2.889e-07
Q9UEL2	0.011168
Q9UHD8	0.010666
Q9UHG3	4.7822e-07
Q9UHX1	0.00078349
Q9UIJ7	0.037424
Q9UJ70	0.00054354
Q9UJZ1	5.0296e-06
Q9UKM9	3.5173e-06
Q9ULV4	0.00045593
Q9UMH5	1.0555e-05
Q9UMH6	0.00010556
Q9UMS4	1.2788e-07
Q9UQ16	7.8688e-05
Q9UQD4	0.0016857
Q9Y266	1.5558e-07
Q9Y3B8	2.4254e-07
Q9Y3D6	2.976e-07
Q9Y3I0	0.00049403
Q9Y3Z3	0.013931
Q9Y490	0.00053844
Q9Y570	0.00056376
Q9Y5B9	4.5019e-07
Q9Y617	2.889e-07
Q9Y6C9	0.00027937
Q9Y6E3	5.7989e-05
Q9Y6K5	0.0112
R4GN98	4.2894e-08
S4R3G0	1.4218e-06
S4R3N1	0.020366
S4R435	0.00052918
T2DQ69	0.0004242
U5Y1J8	0.00054354
V5NQU4	2.976e-07
V9H062	7.5381e-07
V9H0D5	1.8734e-05
V9HVU7	0.00012495
V9HW62	3.4071e-07
V9HW88	0.00026709
V9HW90	0.00080449
V9HWJ1	0.00010684
W8QEH3	0.00069625
X5D7P1	0.00028686
X5D945	0.0031318
